# Supplementary material
Source: PubMed Central journal article supplement (PMC8388068)

## Supplemental information

### A time-resolved proteomic and prognostic map of COVID-19

Vadim Demichev, Pinkus Tober-Lau, Oliver Lemke, Tatiana Nazarenko, Charlotte Thibeault, Harry Whitwell, Annika Röhl, Anja Freiwald, Lukasz Szyrwił, Daniela Ludwig, Clara Correia-Melo, Simran Kaur Aulakh, Elisa T. Helbig, Paula Stubbemann, Lena J. Lippert, Nana-Maria Grüning, Oleg Blyuss, Spyros Vernardis, Matthew White, Christoph B. Messner, Michael Joannidis, Thomas Sonnweber, Sebastian J. Klein, Alex Pizzini, Yvonne Wohlfarter, Sabina Sahanic, Richard Hilbe, Benedikt Schaefer, Sonja Wagner, Mirja Mittermaier, Felix Machleidt, Carmen Garcia, Christoph Ruwwe-Glösenkamp, Tilman Lingscheid, Laure Bosquillon de Jarcy, Miriam S. Stegemann, Moritz Pfeiffer, Linda Jürgens, Sophy Denker, Daniel Zickler, Philipp Enghard, Aleksej Zelezniak, Archie Campbell, Caroline Hayward, David J. Porteous, Riccardo E. Marioni, Alexander Uhrig, Holger Müller-Redetzky, Heinz Zoller, Judith Löffler-Ragg, Markus A. Keller, Ivan Tancevski, John F. Timms, Alexey Zaikin, Stefan Hippenstiel, Michael Ramharter, Martin Witzernath, Norbert Suttorp, Kathryn Lilley, Michael Mülleder, Leif Erik Sander, PA-COVID-19 Study group, Markus Ralser, and Florian Kurth

| Patient state                 | Descriptor                                                       | Score |
|-------------------------------|------------------------------------------------------------------|-------|
| Uninfected                    | No clinical or virological evidence of infection                 | 0     |
| Ambulatory                    | No limitation of activities                                      | 1     |
|                               | Limitation of activities                                         | 2     |
| Hospitalised - mild disease   | No oxygen therapy                                                | 3     |
|                               | Oxygen by mask or nasal prongs                                   | 4     |
| Hospitalised - severe disease | Non-invasive ventilation or high-flow oxygen                     | 5     |
|                               | Intubation and mechanical ventilation                            | 6     |
|                               | Ventilation + additional organ support (vasopressors, RRT, ECMO) | 7     |
| Dead                          | Death                                                            | 8     |

Supplementary Table 1. **WHO ordinal scale for clinical improvement in COVID-19 as used in the study** (World Health Organisation 2020).

|                                                    | All patients |             | No invasive mechanical ventilation     |             |                                              |             |                                               |             | Invasive mechanical ventilation                    |             |                                                         |             | Deceased** |             |
|----------------------------------------------------|--------------|-------------|----------------------------------------|-------------|----------------------------------------------|-------------|-----------------------------------------------|-------------|----------------------------------------------------|-------------|---------------------------------------------------------|-------------|------------|-------------|
|                                                    | All patients |             | Max WHO 3<br>No supplemental<br>oxygen |             | Max WHO 4<br>Supplemental low<br>flow oxygen |             | Max WHO 5<br>Supplemental high<br>flow oxygen |             | Max WHO 6<br>Invasive<br>mechanical<br>ventilation |             | Max WHO 7<br>additional organ<br>replacement<br>therapy |             |            |             |
| <b>Number of patients</b>                          | 139          | 100%        | 23                                     | 17%         | 33                                           | 24%         | 14                                            | 10%         | 6                                                  | 4%          | 63                                                      | 45%         | 17         | 12%         |
| <b>Sex</b>                                         |              |             |                                        |             |                                              |             |                                               |             |                                                    |             |                                                         |             |            |             |
| Female                                             | 44           | 32%         | 13                                     | 57%         | 8                                            | 24%         | 3                                             | 21%         | 1                                                  | 17%         | 19                                                      | 30%         | 3          | 18%         |
| Male                                               | 95           | 68%         | 10                                     | 43%         | 25                                           | 76%         | 11                                            | 79%         | 5                                                  | 83%         | 44                                                      | 70%         | 14         | 82%         |
| <b>Age, years (Median, IQR)</b>                    | 61           | 50 - 71     | 49                                     | 35 - 70     | 63                                           | 48 - 71     | 62                                            | 49 - 85     | 64                                                 | 59 - 71     | 62                                                      | 53 - 72     | 69         | 55 - 77     |
| ≥65                                                | 57           | 41%         | 6                                      | 26%         | 16                                           | 48%         | 6                                             | 43%         | 3                                                  | 50%         | 26                                                      | 41%         | 11         | 65%         |
| <b>BMI (kg/m<sup>2</sup>, Median, IQR)</b>         | 27.8         | 24.7 - 31.9 | 25.4                                   | 23.0 - 30.6 | 27.2                                         | 23.3 - 30.3 | 27.1                                          | 23.3 - 34.9 | 26.6                                               | 24.6 - 28.1 | 29.4                                                    | 25.7 - 34.1 | 29.0       | 24.8 - 31.0 |
| < 25 kg/m <sup>2</sup>                             | 40           | 29%         | 10                                     | 43%         | 13                                           | 39%         | 3                                             | 21%         | 2                                                  | 33%         | 12                                                      | 20%         | 4          | 24%         |
| ≥ 25 kg/m <sup>2</sup>                             | 97           | 71%         | 13                                     | 57%         | 20                                           | 61%         | 11                                            | 79%         | 4                                                  | 66%         | 49                                                      | 80%         | 13         | 76%         |
| <b>Pre-existing conditions</b>                     |              |             |                                        |             |                                              |             |                                               |             |                                                    |             |                                                         |             |            |             |
| CCI (Median, IQR)                                  | 3            | 1 - 4       | 1                                      | 0 - 3       | 4                                            | 1 - 5       | 3                                             | 1 - 6       | 2.5                                                | 2 - 5       | 3                                                       | 1 - 4       | 3          | 3 - 6       |
| <3                                                 | 65           | 47%         | 16                                     | 70%         | 13                                           | 39%         | 7                                             | 50%         | 3                                                  | 50%         | 26                                                      | 41%         | 2          | 12%         |
| ≥3                                                 | 74           | 53%         | 7                                      | 30%         | 20                                           | 61%         | 7                                             | 50%         | 3                                                  | 50%         | 37                                                      | 59%         | 15         | 88%         |
| Hypertension                                       | 78           | 56%         | 6                                      | 26%         | 21                                           | 64%         | 7                                             | 50%         | 3                                                  | 50%         | 41                                                      | 65%         | 15         | 88%         |
| Congestive heart failure                           | 7            | 5%          | 0                                      | 0%          | 3                                            | 9%          | 0                                             | 0%          | 1                                                  | 17%         | 3                                                       | 5%          | 1          | 6%          |
| h/o myocardial infarction                          | 13           | 9%          | 1                                      | 4%          | 2                                            | 6%          | 1                                             | 7%          | 1                                                  | 17%         | 8                                                       | 13%         | 1          | 6%          |
| Chronic lung disease                               | 22           | 16%         | 2                                      | 9%          | 6                                            | 18%         | 1                                             | 7%          | 2                                                  | 33%         | 11                                                      | 17%         | 3          | 18%         |
| Asthma                                             | 7            | 5%          | 1                                      | 4%          | 2                                            | 6%          | 0                                             | 0%          | 0                                                  | 0%          | 4                                                       | 6%          | 1          | 6%          |
| COPD                                               | 15           | 11%         | 1                                      | 4%          | 5                                            | 15%         | 0                                             | 0%          | 1                                                  | 17%         | 8                                                       | 13%         | 2          | 12%         |
| on home oxygen therapy                             | 6            | 4%          | 0                                      | 0%          | 1                                            | 3%          | 0                                             | 0%          | 1                                                  | 17%         | 4                                                       | 6%          | 2          | 12%         |
| Diabetes                                           | 31           | 22%         | 1                                      | 4%          | 9                                            | 27%         | 4                                             | 29%         | 1                                                  | 17%         | 16                                                      | 25%         | 3          | 18%         |
| Type II diabetes (% of diabetes)                   | 30           | 97%         | 1                                      | 100%        | 8                                            | 89%         | 4                                             | 100%        | 1                                                  | 100%        | 16                                                      | 100%        | 3          | 100%        |
| Oral hypoglycaemic drugs                           | 16           | 12%         | 0                                      | 0%          | 5                                            | 15%         | 2                                             | 14%         | 0                                                  | 0%          | 9                                                       | 14%         | 2          | 12%         |
| Insulin therapy                                    | 11           | 8%          | 0                                      | 0%          | 6                                            | 18%         | 2                                             | 14%         | 0                                                  | 0%          | 3                                                       | 5%          | 0          | 0%          |
| Chronic kidney disease                             | 19           | 14%         | 2                                      | 9%          | 8                                            | 24%         | 3                                             | 21%         | 0                                                  | 0%          | 6                                                       | 10%         | 2          | 12%         |
| Requiring RRT                                      | 2            | 2%          | 0                                      | 0%          | 1                                            | 3%          | 0                                             | 0%          | 0                                                  | 0%          | 1                                                       | 2%          | 1          | 6%          |
| Chronic liver disease                              | 8            | 6%          | 2                                      | 9%          | 3                                            | 9%          | 1                                             | 7%          | 0                                                  | 0%          | 2                                                       | 3%          | 1          | 6%          |
| Lipid metabolism disorder                          | 21           | 15%         | 4                                      | 17%         | 9                                            | 27%         | 1                                             | 7%          | 1                                                  | 17%         | 6                                                       | 10%         | 3          | 18%         |
| h/o stroke                                         | 7            | 5%          | 0                                      | 0%          | 1                                            | 3%          | 1                                             | 7%          | 1                                                  | 17%         | 4                                                       | 6%          | 1          | 6%          |
| Ischemic (% of stroke)                             | 6            | 86%         | 0                                      | 0%          | 1                                            | 100%        | 1                                             | 100%        | 1                                                  | 100%        | 3                                                       | 75%         | 0          | 0%          |
| Active malignancy                                  | 3            | 2%          | 0                                      | 0%          | 0                                            | 0%          | 0                                             | 0%          | 1                                                  | 17%         | 2                                                       | 3%          | 1          | 6%          |
| h/o solid organ transplant                         | 3            | 2%          | 0                                      | 0%          | 2                                            | 6%          | 0                                             | 0%          | 0                                                  | 0%          | 1                                                       | 2%          | 1          | 6%          |
| h/o immunosuppressive therapy within past 3 months | 13           | 9%          | 2                                      | 9%          | 4                                            | 12%         | 2                                             | 14%         | 0                                                  | 0%          | 5                                                       | 8%          | 3          | 18%         |
| h/o smoking                                        | 33           | 24%         | 6                                      | 26%         | 14                                           | 42%         | 2                                             | 14%         | 2                                                  | 33%         | 9                                                       | 14%         | 2          | 12%         |
| Current smoker                                     | 5            | 4%          | 1                                      | 4%          | 2                                            | 6%          | 0                                             | 0%          | 1                                                  | 17%         | 1                                                       | 2%          | 0          | 0%          |
| <b>Outpatient medication</b>                       |              |             |                                        |             |                                              |             |                                               |             |                                                    |             |                                                         |             |            |             |
| Total amount (Median, IQR)                         | 2            | 1 - 3       | 1                                      | 0 - 2       | 3                                            | 2 - 5       | 1                                             | 0 - 2       | 5                                                  | 2 - 8       | 2                                                       | 1 - 4       | 2          | 1 - 3       |
| ARB                                                | 24           | 17%         | 2                                      | 9%          | 6                                            | 18%         | 2                                             | 14%         | 0                                                  | 0%          | 14                                                      | 22%         | 2          | 12%         |
| ACE-I                                              | 22           | 22%         | 3                                      | 13%         | 8                                            | 24%         | 1                                             | 7%          | 0                                                  | 0%          | 10                                                      | 16%         | 2          | 12%         |
| Lipid lowering agents                              | 25           | 25%         | 2                                      | 9%          | 11                                           | 33%         | 0                                             | 0%          | 1                                                  | 17%         | 11                                                      | 17%         | 3          | 18%         |

|                                               |       |        |   |        |    |        |    |         |    |         |    |         |    |         |
|-----------------------------------------------|-------|--------|---|--------|----|--------|----|---------|----|---------|----|---------|----|---------|
| <b>Duration of hospital course* (days)</b>    | 20    | 9 - 48 | 7 | 4 - 10 | 14 | 9 - 17 | 20 | 13 - 28 | 38 | 24 - 71 | 46 | 32 - 75 | 28 | 16 - 46 |
| Proning**                                     | 51    | 38%    | - | -      | -  | -      | -  | -       | 2  | 33%     | 49 | 78%     | 13 | 76%     |
| Mechanical ventilation**                      | 69    | 50%    | - | -      | -  | -      | -  | -       | 6  | 100%    | 63 | 100%    | 17 | 100%    |
| RRT                                           | 46    | 33%    | 0 | 0%     | 1  | 3%     | 0  | 0%      | 1  | 17%     | 44 | 70%     | 15 | 88%     |
| ECMO**                                        | 22    | 16%    | - | -      | -  | -      | -  | -       | -  | -       | 22 | 35%     | 8  | 47%     |
| ARDS                                          | 76    | 55%    | 0 | 0%     | 3  | 9%     | 7  | 50%     | 4  | 67%     | 62 | 98%     | 17 | 100%    |
| Sepsis                                        | 41    | 29%    | 0 | 0%     | 2  | 6%     | 3  | 21%     | 2  | 33%     | 34 | 54%     | 12 | 71%     |
| Thromboembolic event                          | 32    | 23%    | 0 | 0%     | 1  | 3%     | 2  | 14%     | 1  | 17%     | 28 | 44%     | 8  | 47%     |
| Cardiopulmonary resuscitation**               | 7     | 6%     | 0 | 0%     | 0  | 0%     | 0  | 0%      | 0  | 0%      | 7  | 12%     | 2  | 12%     |
| <b>Outcome</b>                                |       |        |   |        |    |        |    |         |    |         |    |         |    |         |
| Deceased (incl. DNI/DNR)                      | 20*** | 14%    | 0 | 0%     | 1  | 3%     | 2  | 14%     | 0  | 0%      | 17 | 27%     | -  | -       |
| DNI/DNR                                       | 3     | 2%     | 0 | 0%     | 1  | 3%     | 2  | 14%     | 0  | 0%      | 0  | 0%      | -  | -       |
| Secondary DNI/DNR                             | 4     | 3%     | 0 | 0%     | 0  | 0%     | 0  | 0%      | 0  | 0%      | 4  | 6%      | 4  | 24%     |
| Requiring new oxygen therapy after discharge* | 12    | 10%    | 0 | 0%     | 0  | 0%     | 1  | 10%     | 0  | 0%      | 11 | 24%     | -  | -       |
| Requiring new RRT after discharge*            | 5     | 4%     | 0 | 0%     | 0  | 0%     | 0  | 0%      | 0  | 0%      | 5  | 11%     | -  | -       |

Data are shown in n (%) unless otherwise indicated. IQR – interquartile range, CCI – Charlson’s comorbidity index; CKD – chronic kidney disease; ACE-I – angiotensin-converting enzyme inhibitor, ARB - Angiotensin II receptor blockers, RRT – renal replacement therapy, ECMO – extracorporeal membrane oxygenation, DNI/DNR – do not intubate/do not resuscitate, i.e. patient’s wish not to receive mechanical ventilation, organ replacement therapy, or cardiopulmonary resuscitation - secondary DNR - secondary limitation of therapy in situation of probable unfavourable outcome and according to the presumed patient’s wish

\* deceased patients not included

\*\* patients with DNI/DNR not included

\*\*\* one patient died of non-COVID-19 related cause

**Supplementary Table 2. Baseline, treatment and outcome characteristics of patient cohort with COVID-19 at Charité - University hospital Berlin.** Patients are stratified according to the maximum grade on WHO ordinal scale.



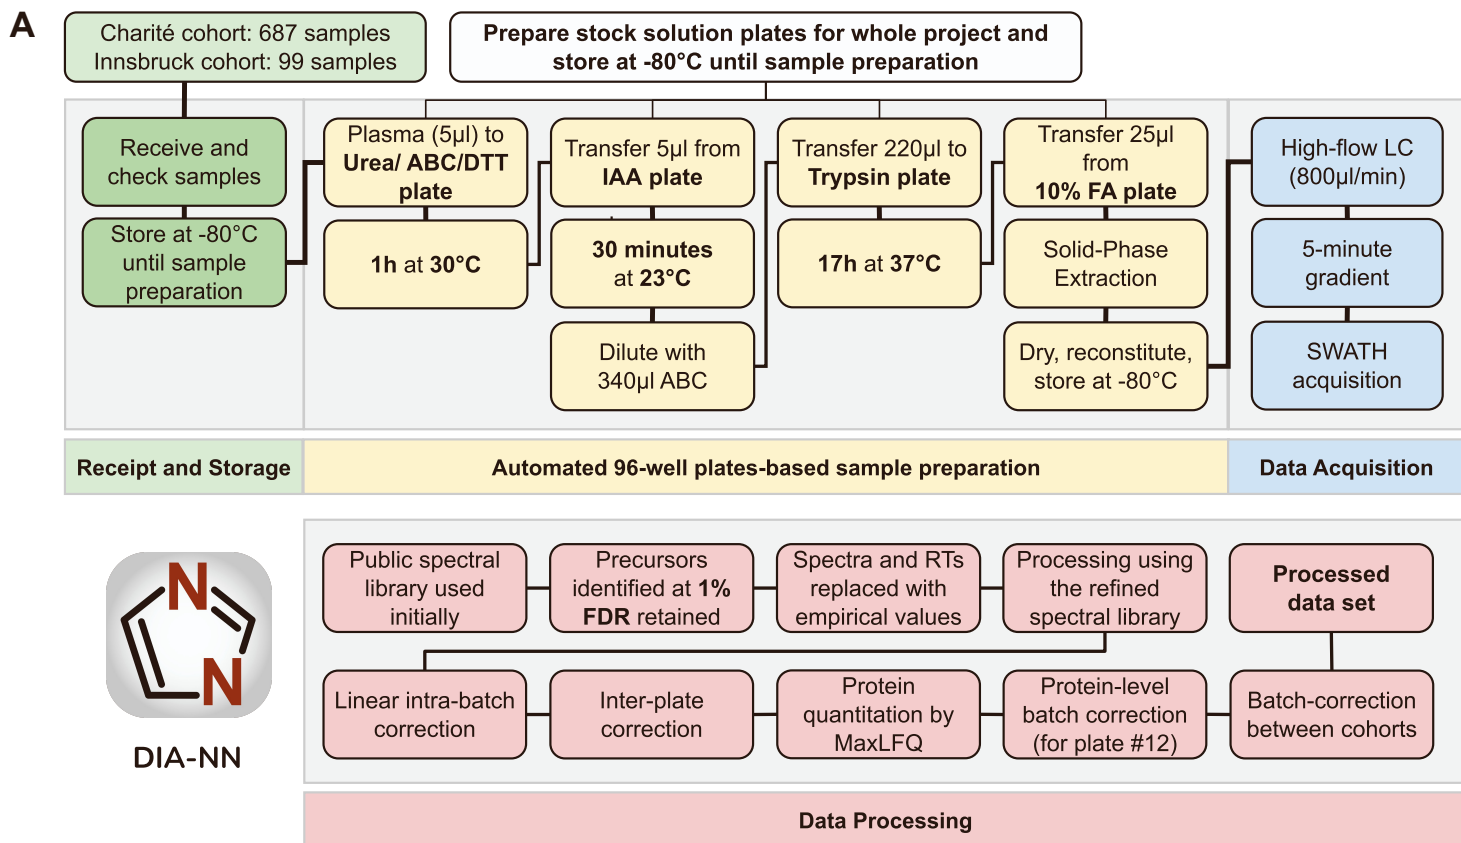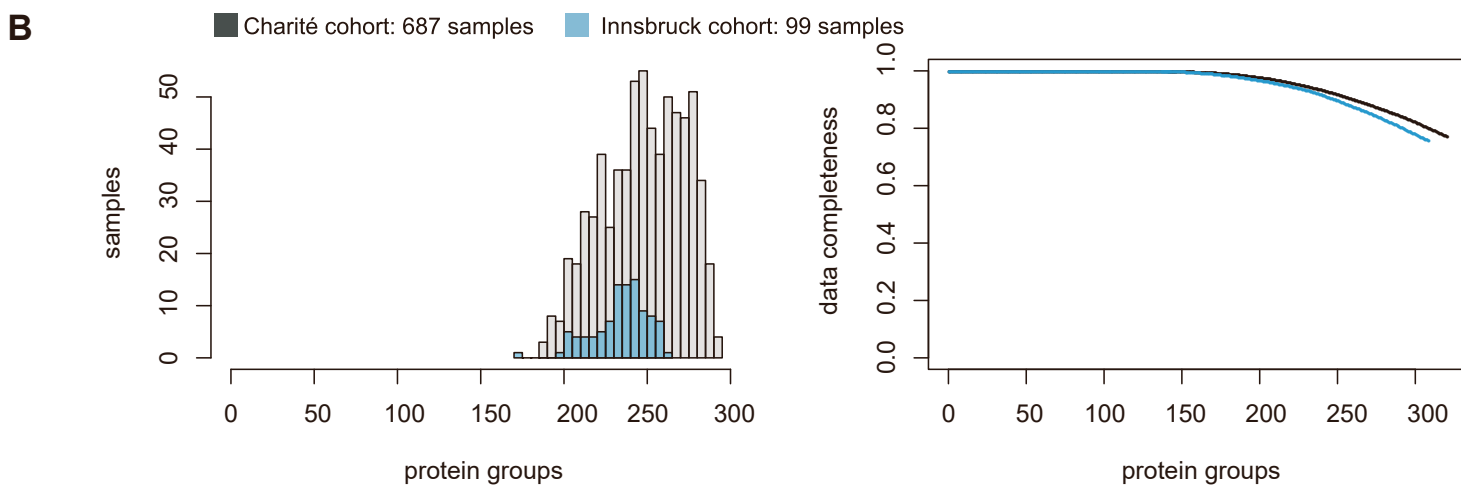

Figure S1. **Plasma proteomics workflow.** **A** The schematic of the 96-well plates-based sample preparation workflow (Messner et al., 2020), followed by mass spectrometry and raw data processing. The workflow results in normalised and batch-corrected protein quantities. Imputation of missing values is not performed per se, but might be required for certain downstream analyses. All statistical tests in the present work were applied without imputation, while imputation was performed for machine learning (Methods). **B** Distribution of the numbers of quantified protein groups across different samples in two cohorts (left) and the data completeness plotted against the number of protein groups (right).

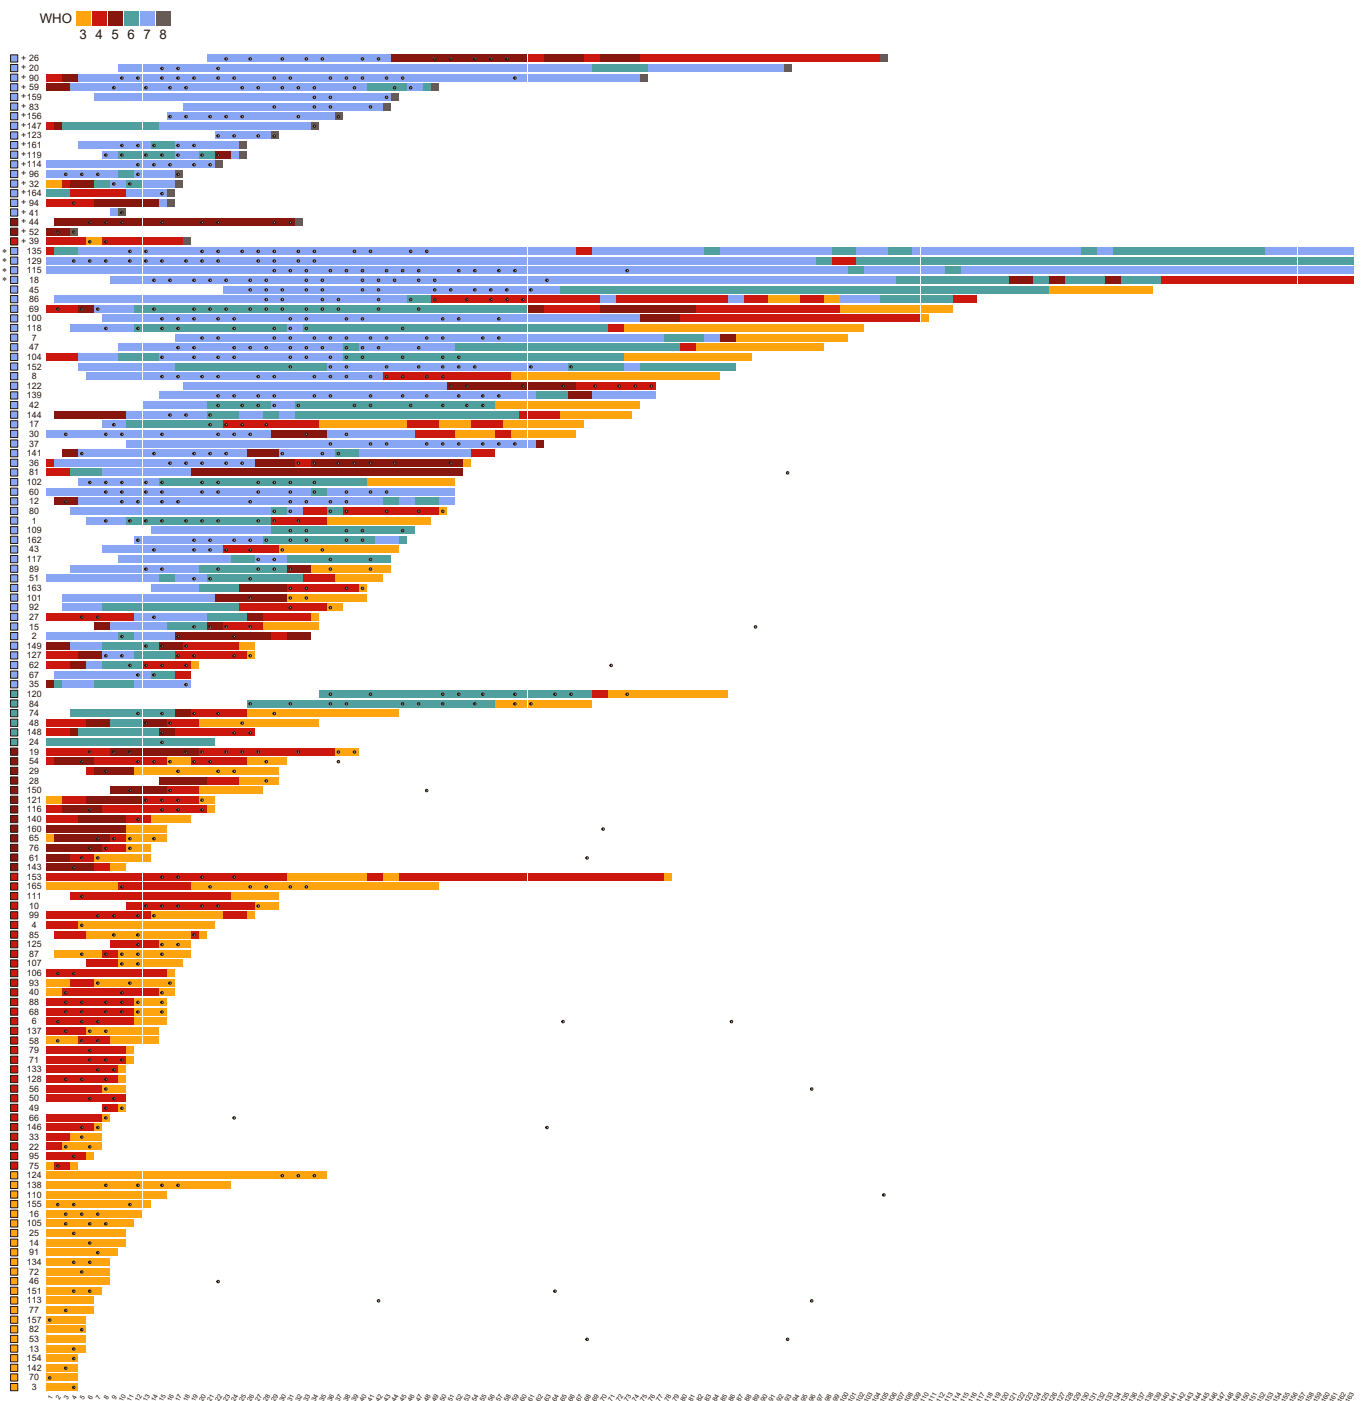

Figure S2. Disease trajectories from hospital admission onward. Patient IDs are given on the y-axis, number of days since admission on the x-axis, WHO severity grade is color-coded, starting with the day the patient was admitted to Charite or transferred from another hospital. Proteomic samples (including follow-up visits after discharge) are indicated with white points.

+ deceased  
 \* still in hospital on 30 August 2020

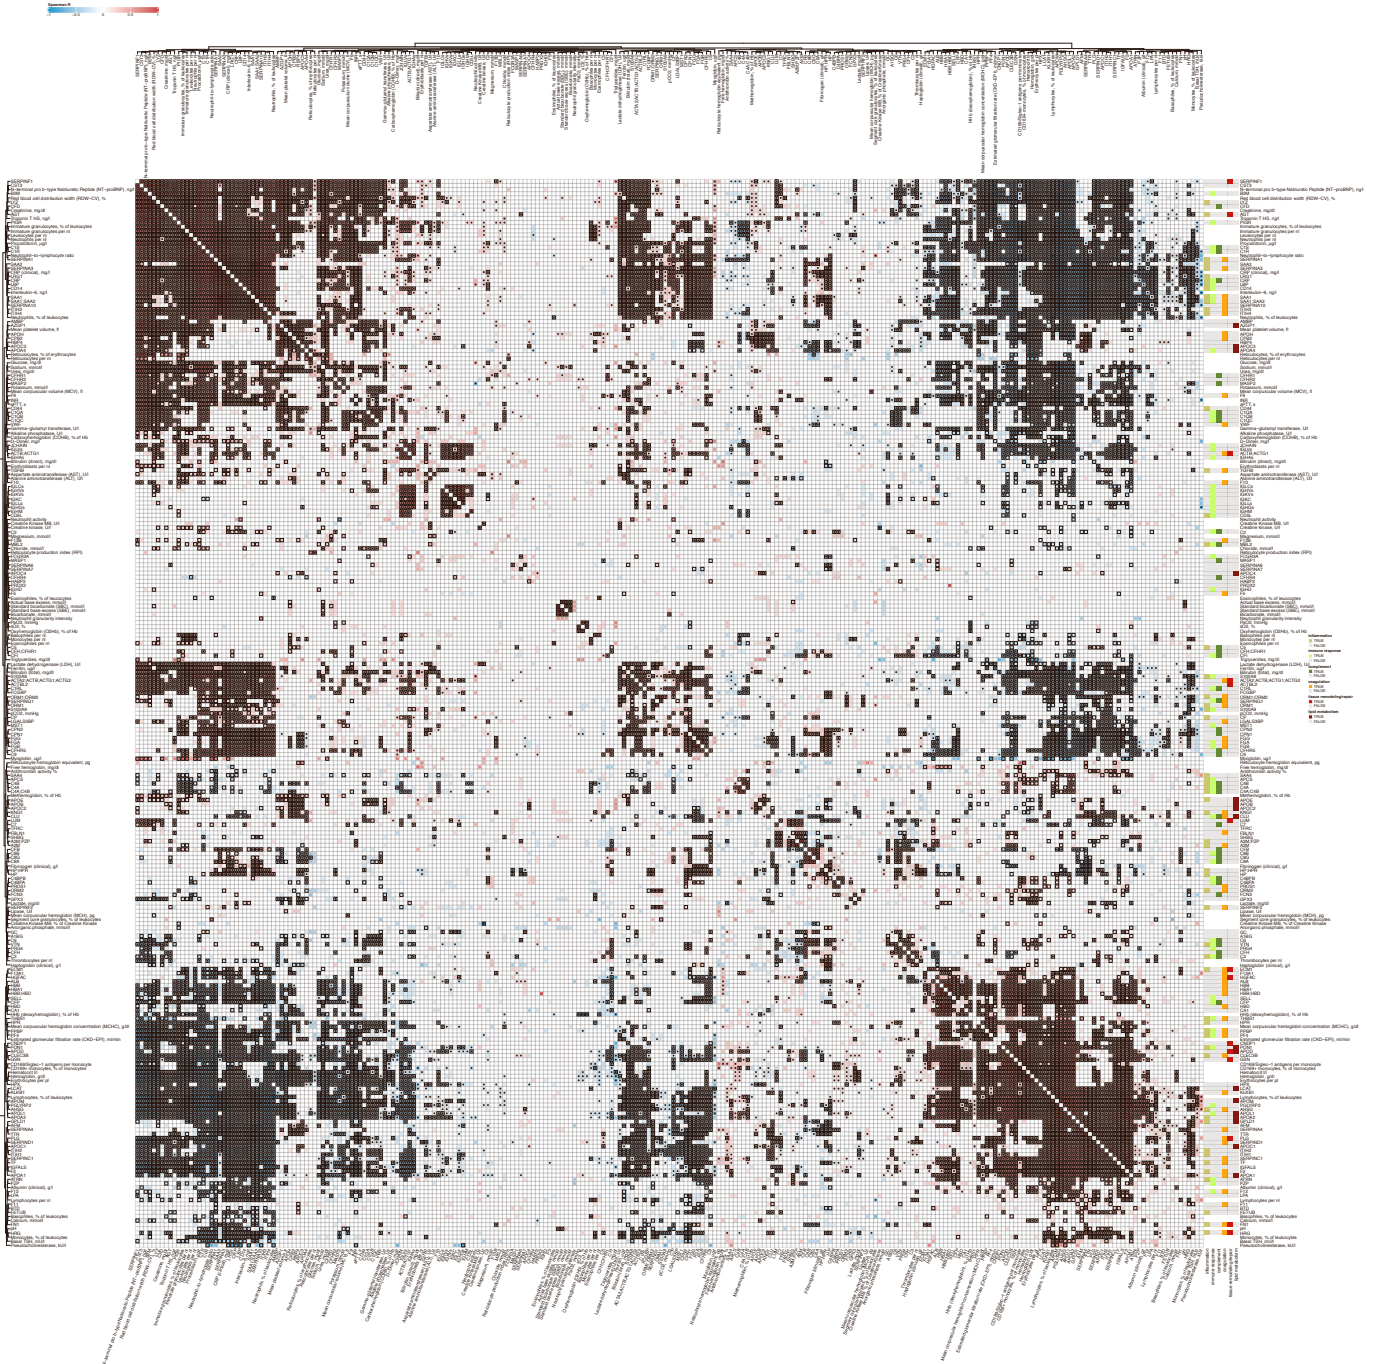

Figure S3. Map of all correlations between omics measurements

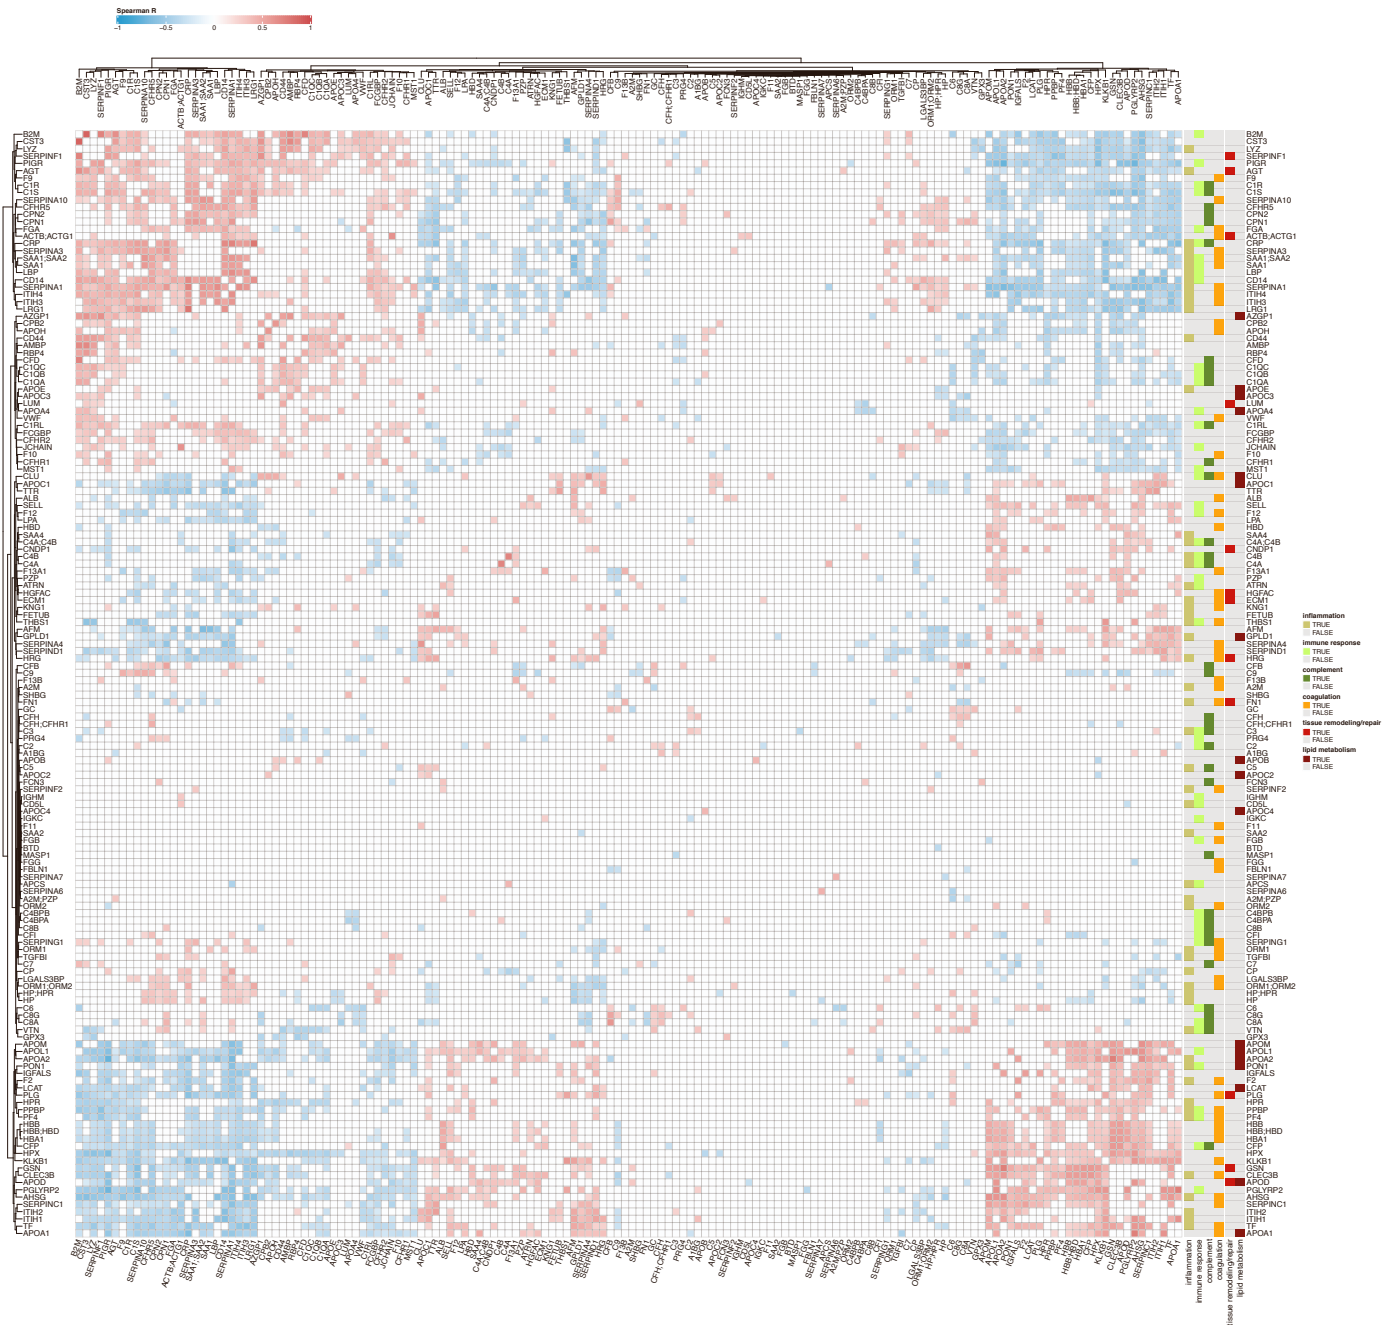

Figure S4. Map of COVID-19-specific protein-protein correlations





Figure S6 (following 5 pages). Omics features significantly regulated depending on COVID-19 severity

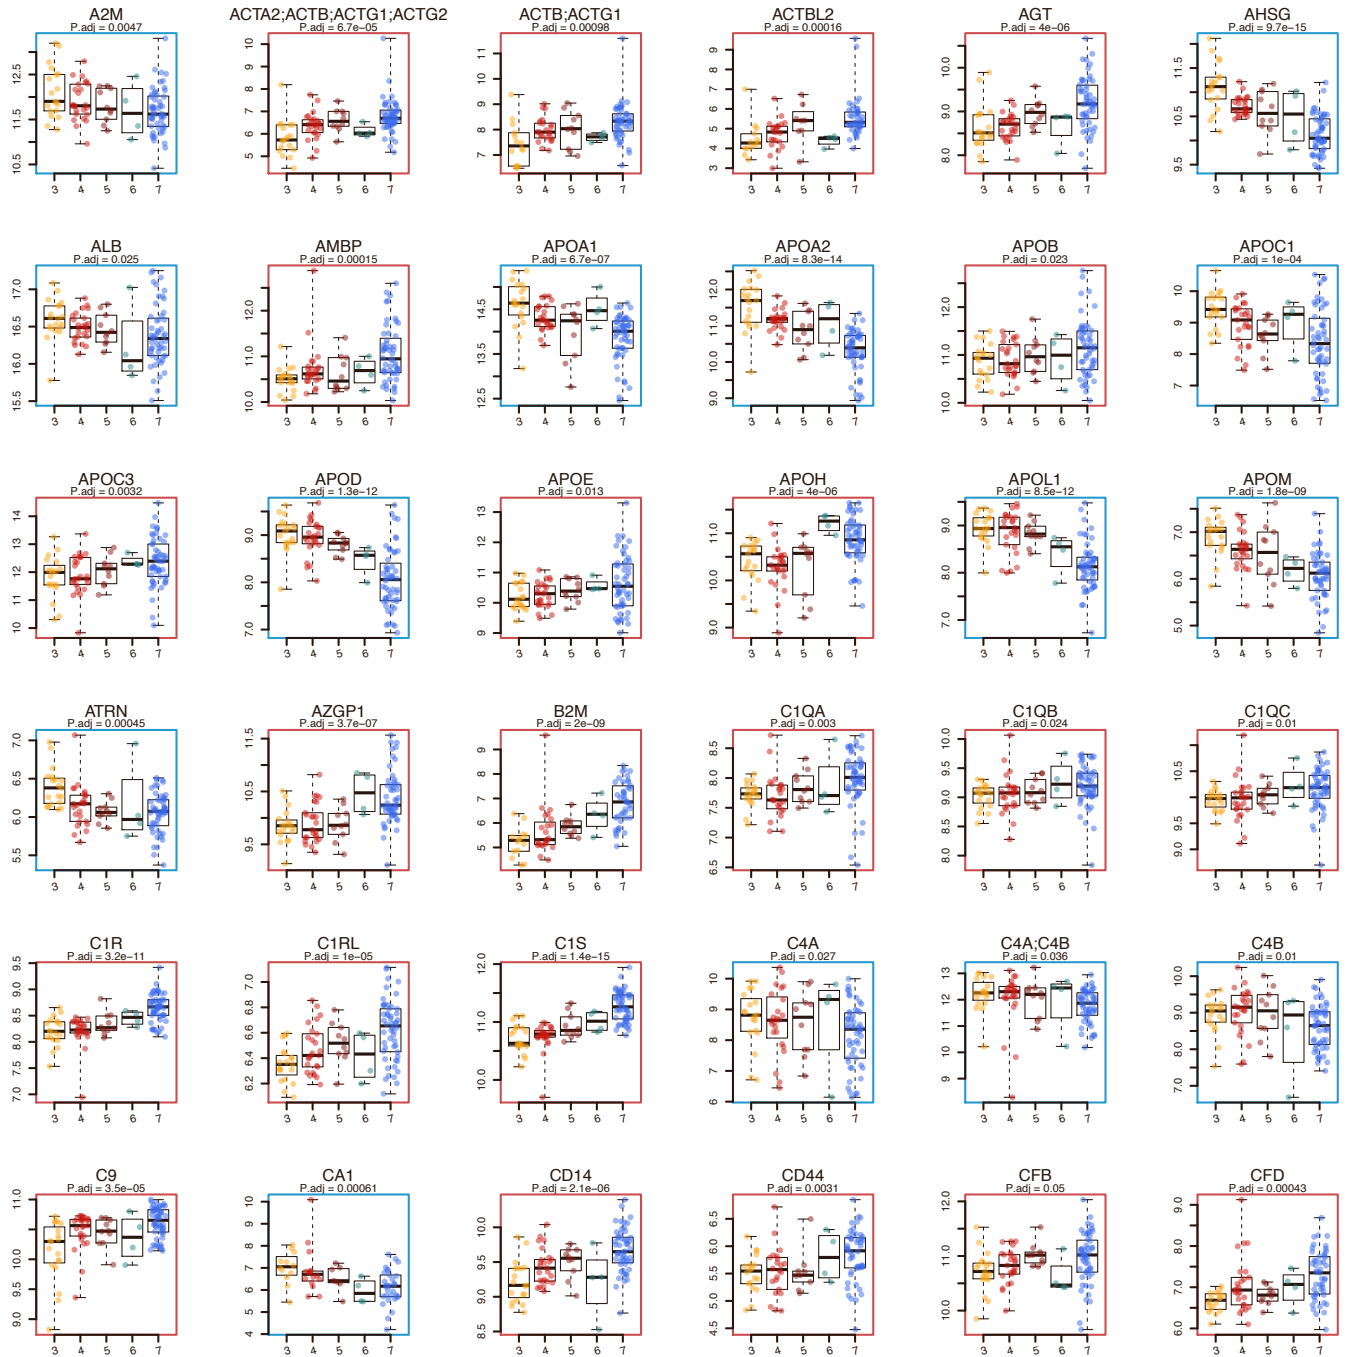

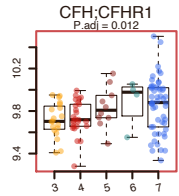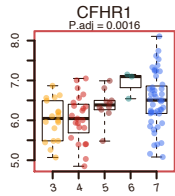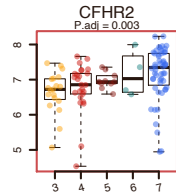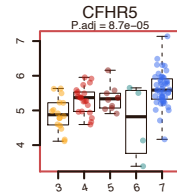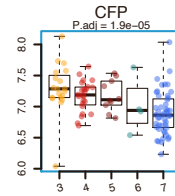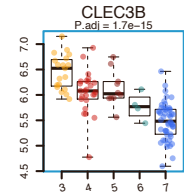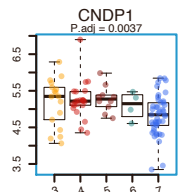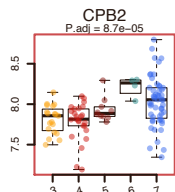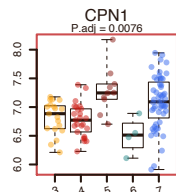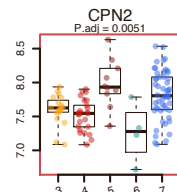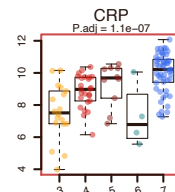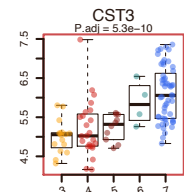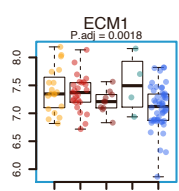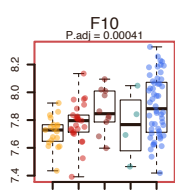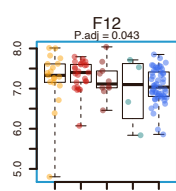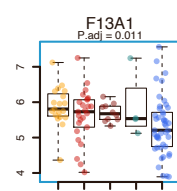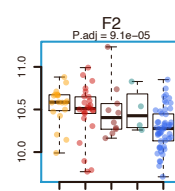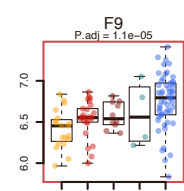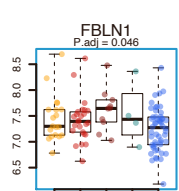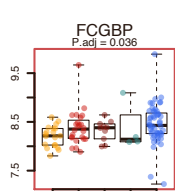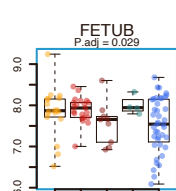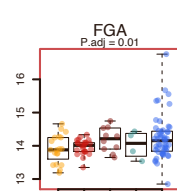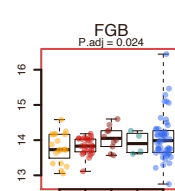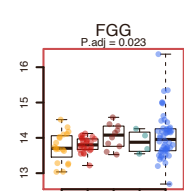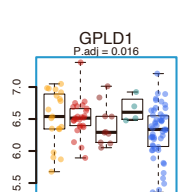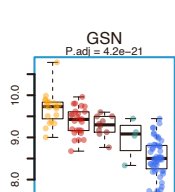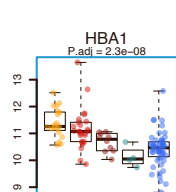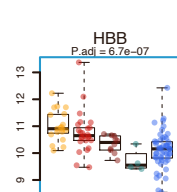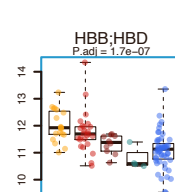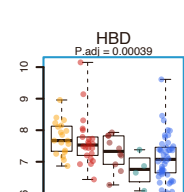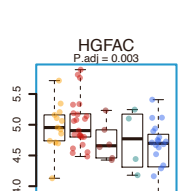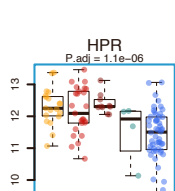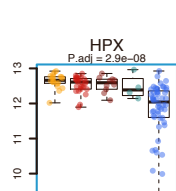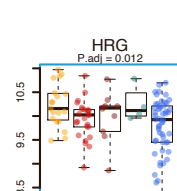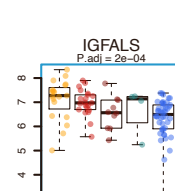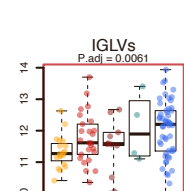

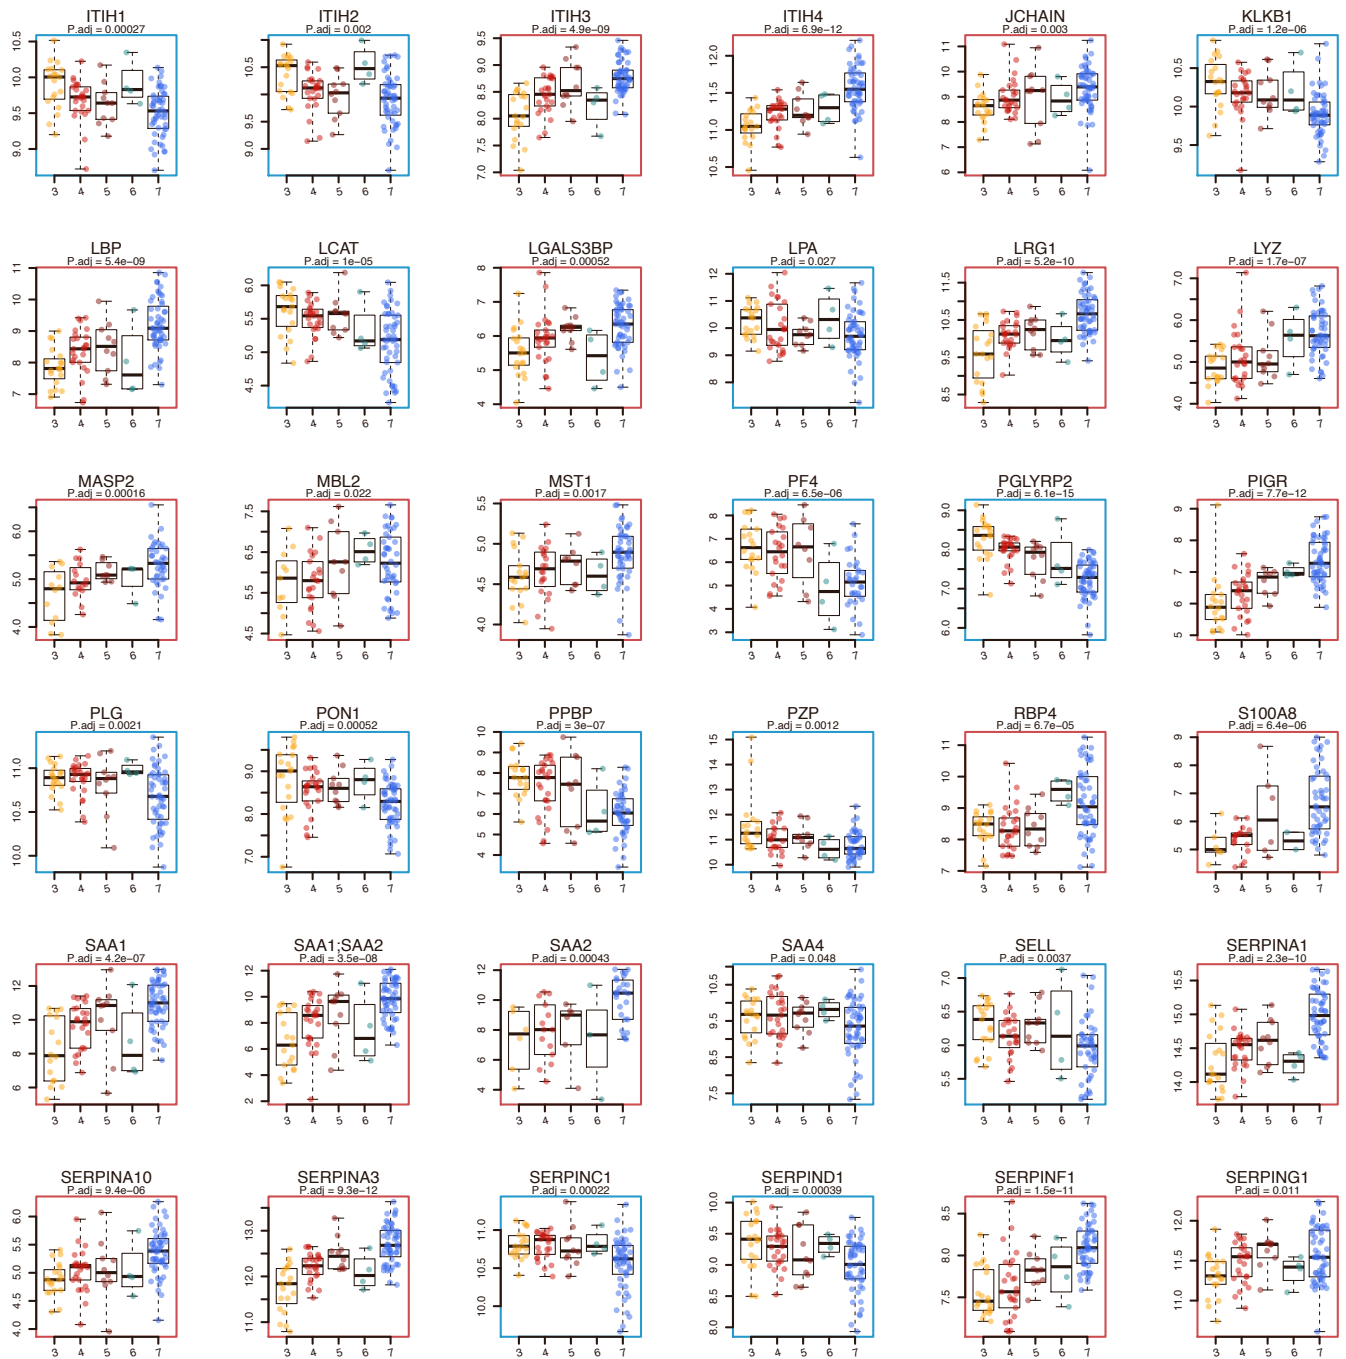



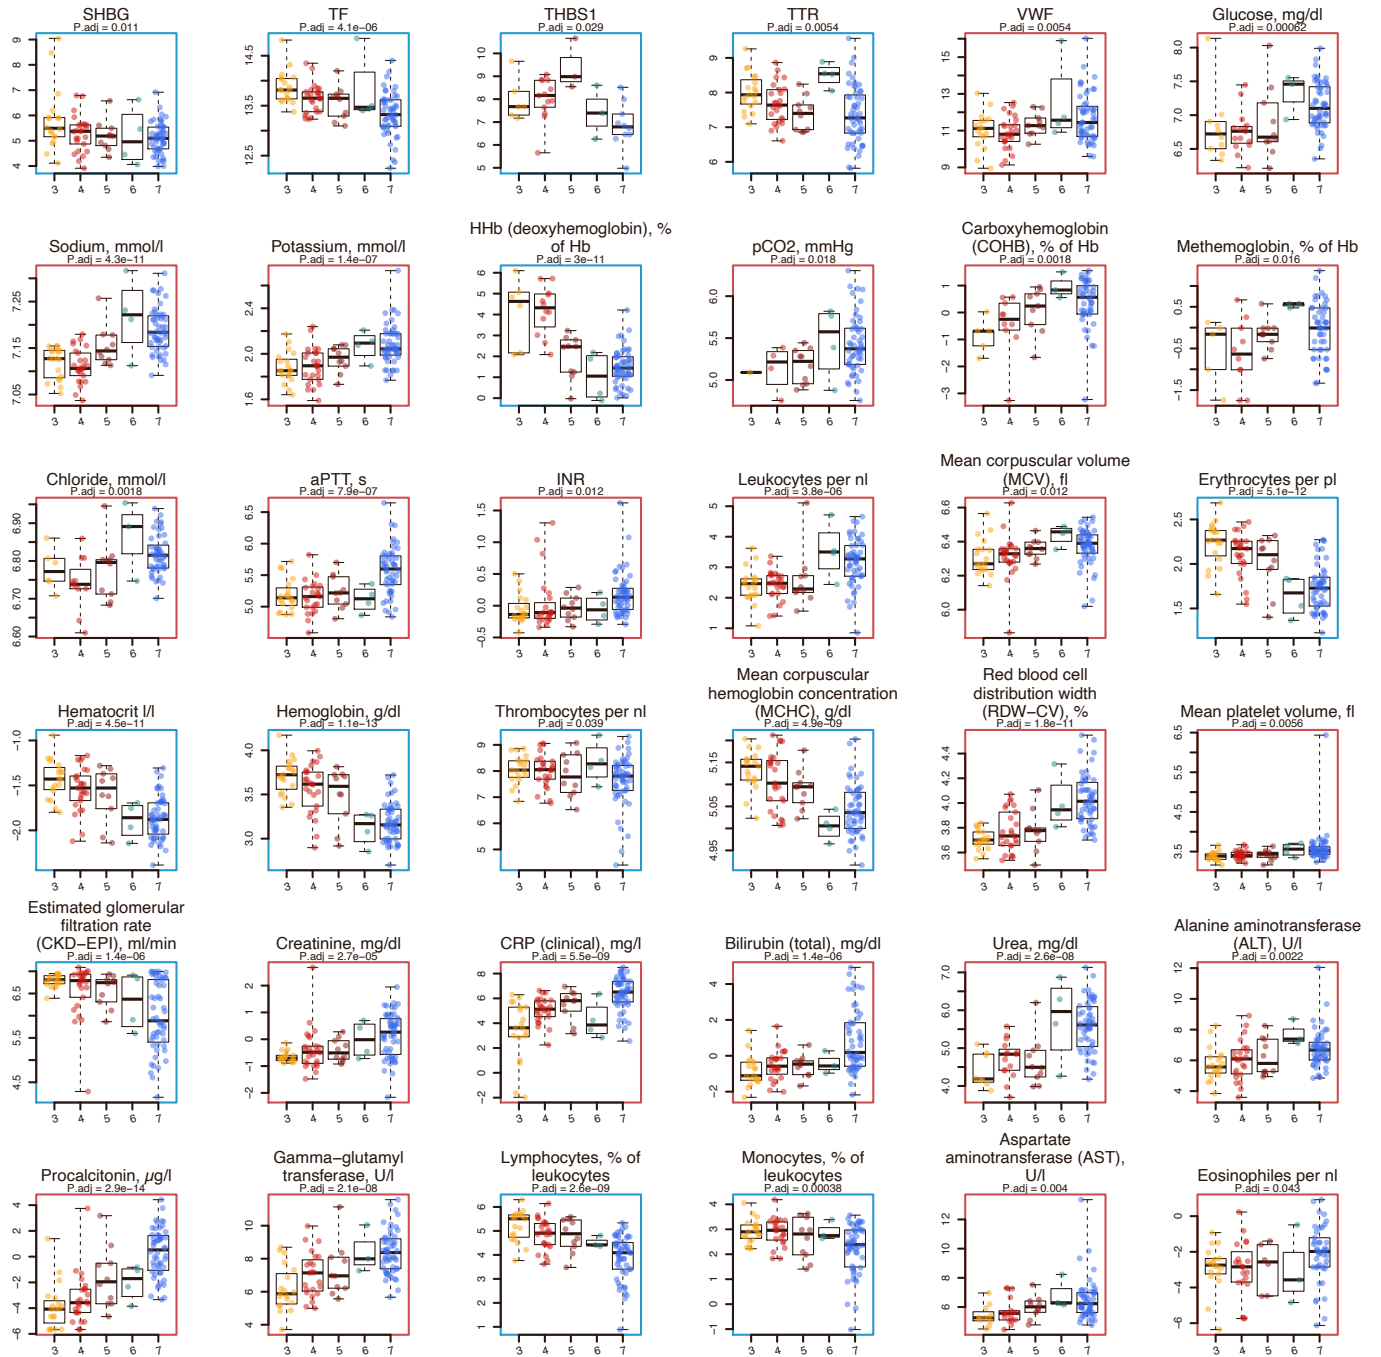

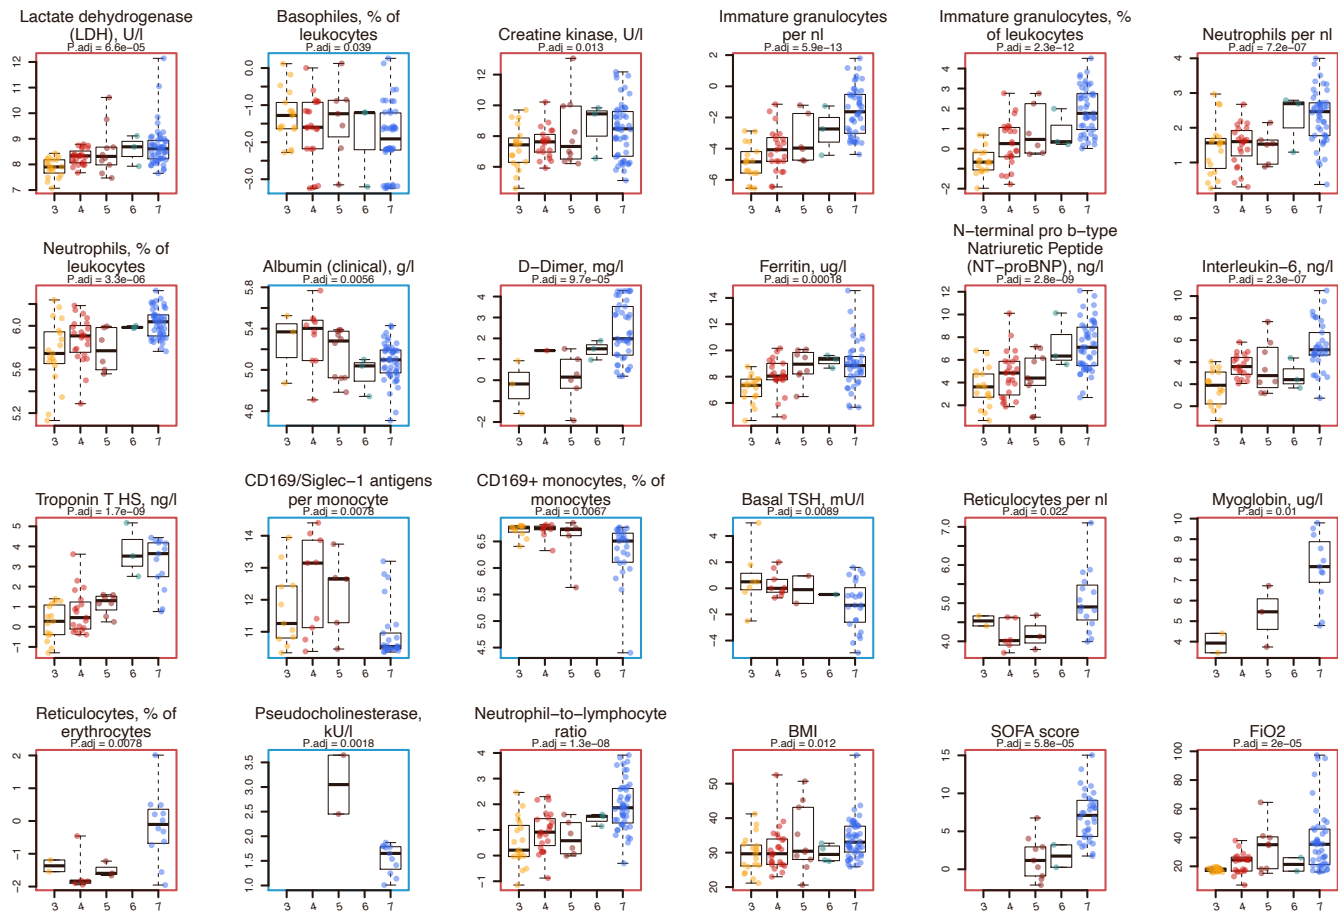

Figure S7. Omics features significantly regulated upon RRT

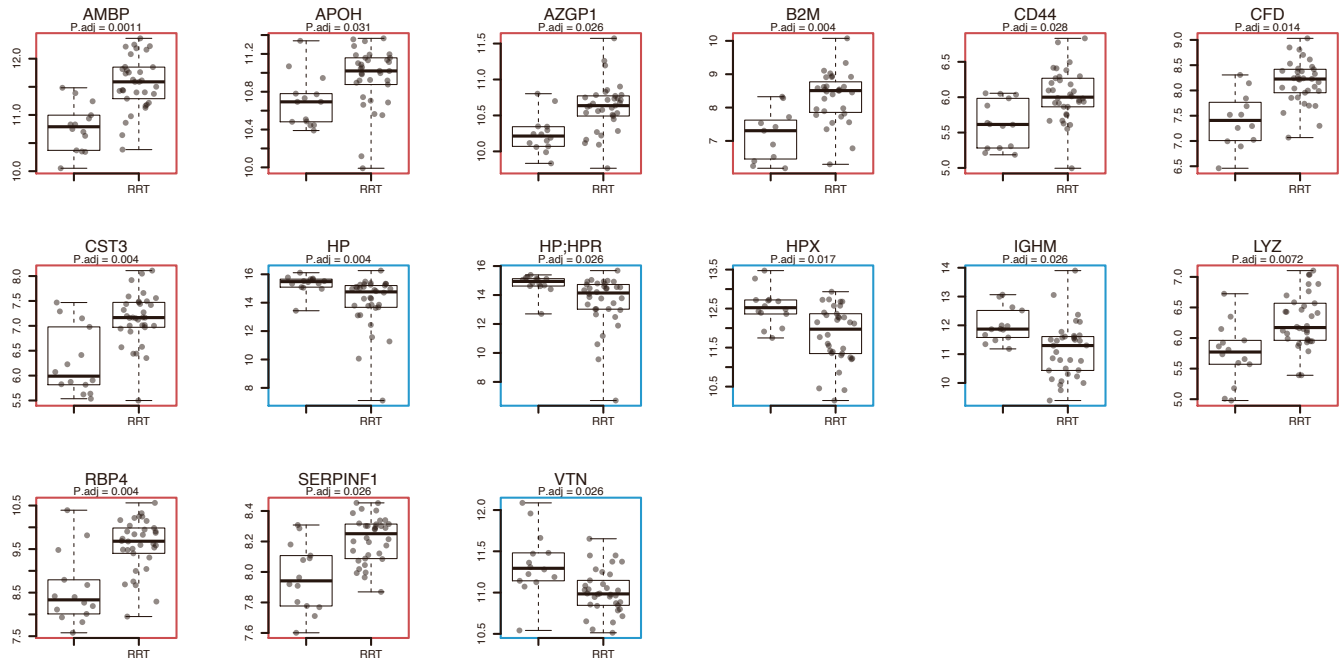

Figure S8. Omics features significantly regulated upon ECMO

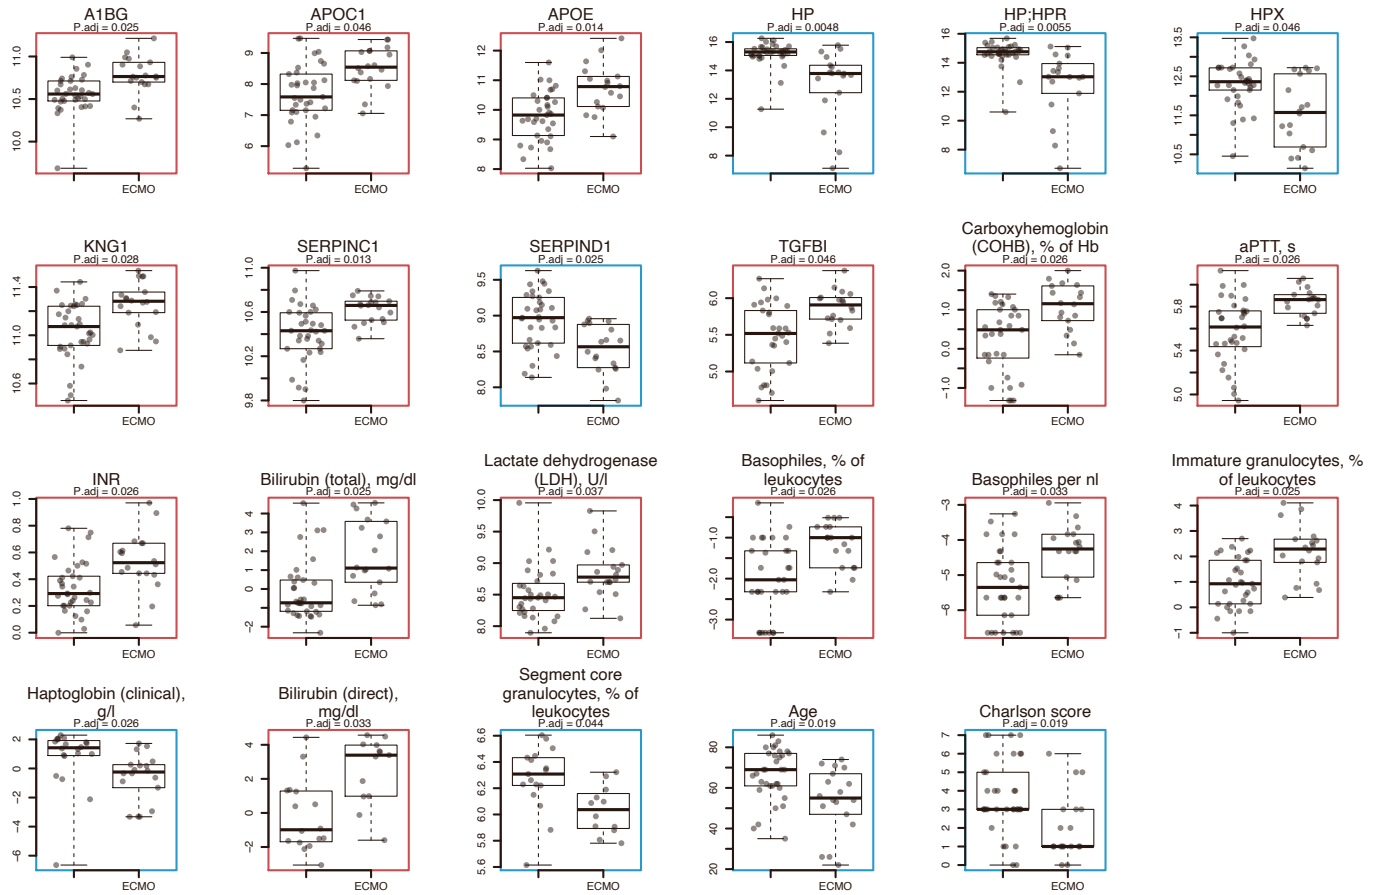

Figure S9 (following 3 pages). Omics features changing with age - test without accounting for the WHO grade as a covariate

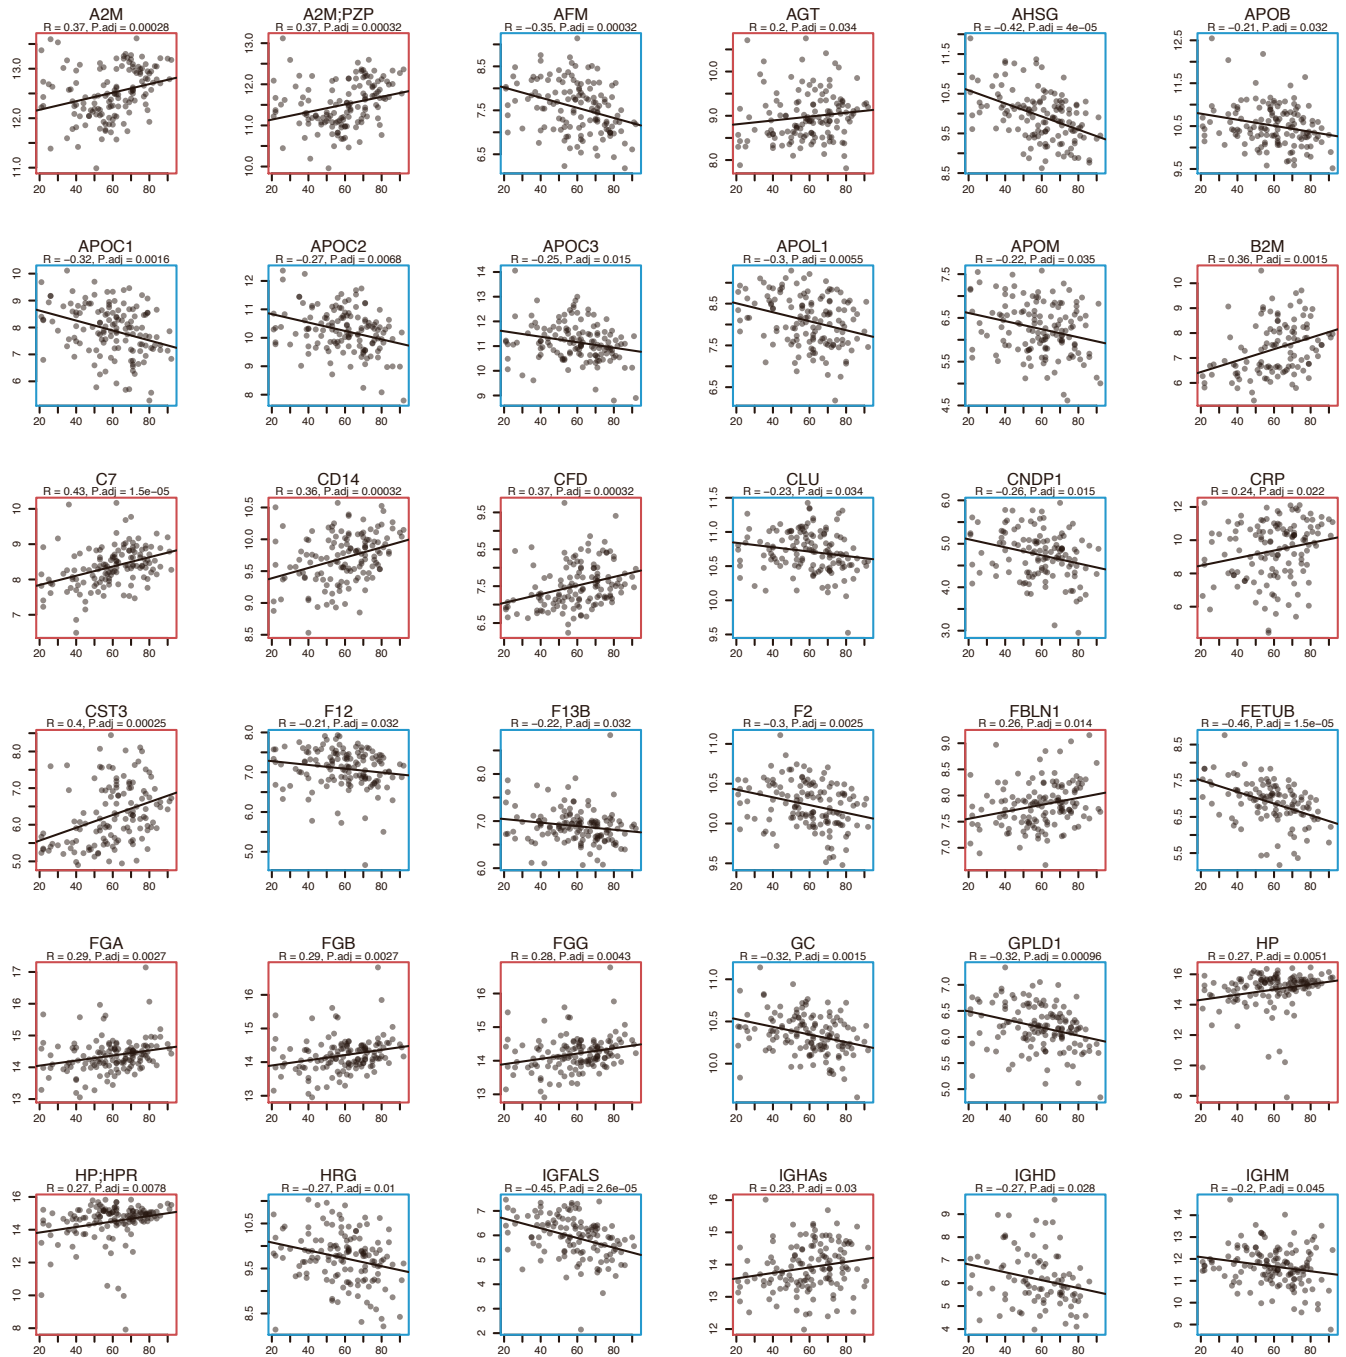

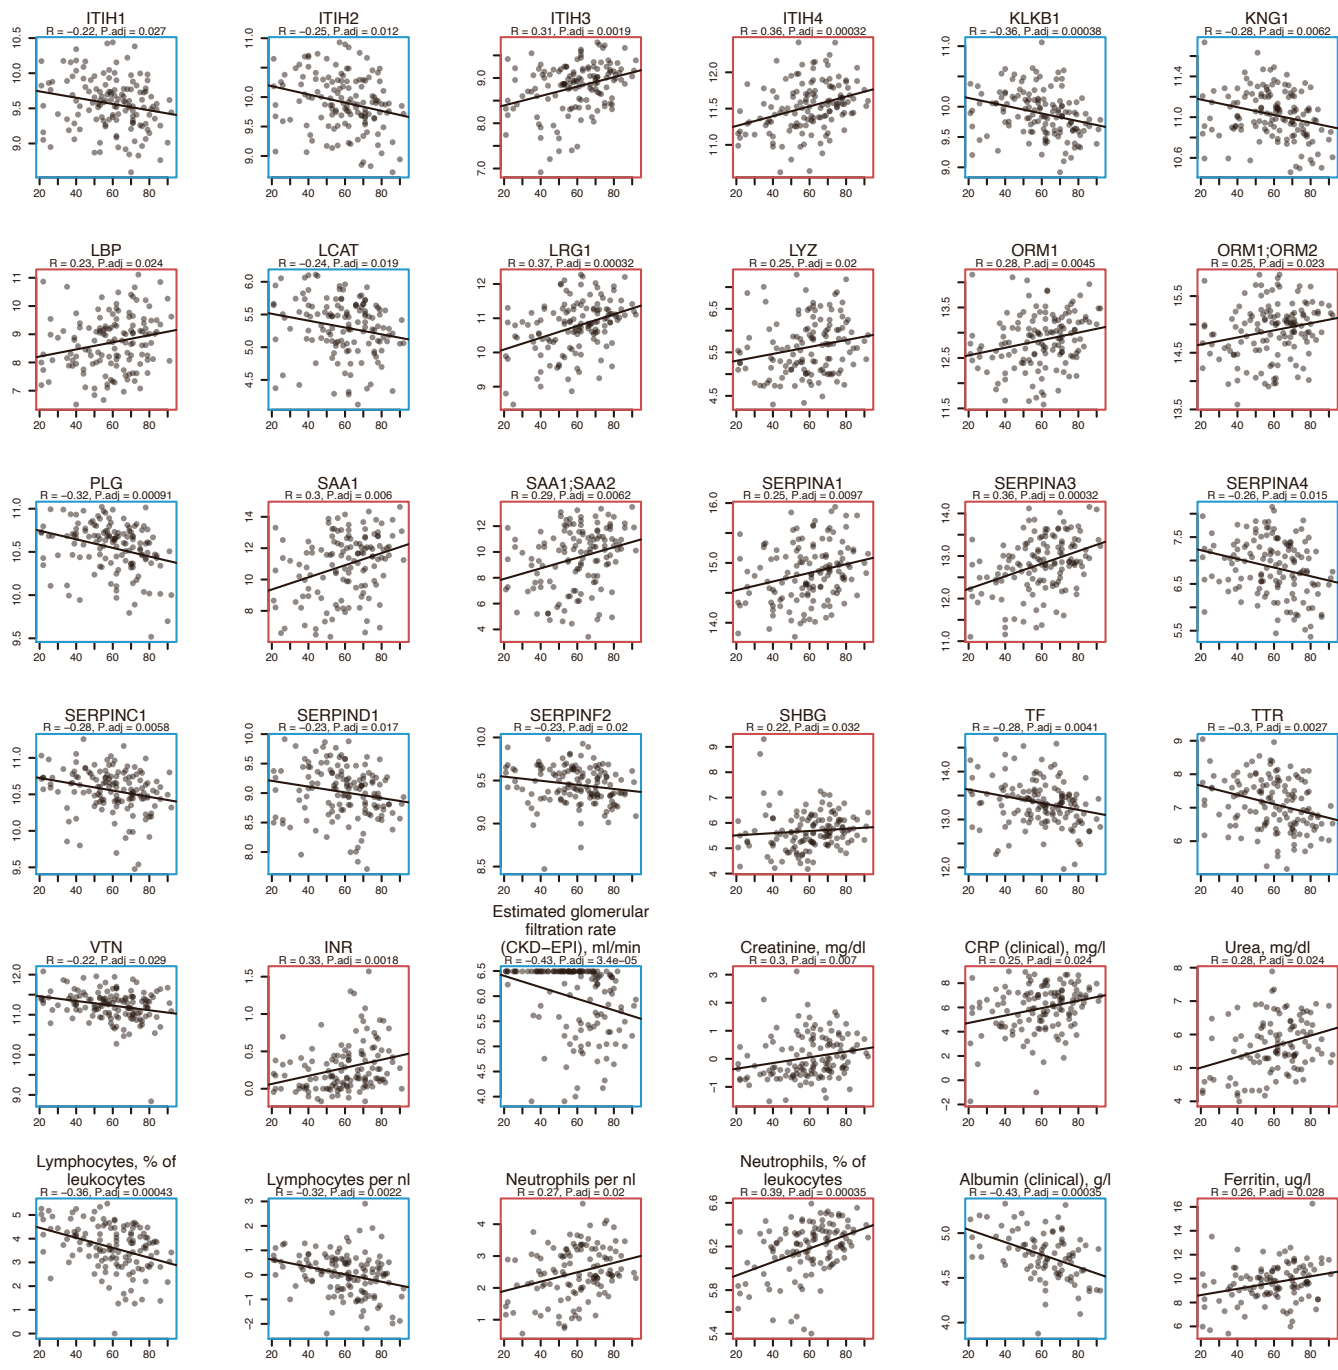

N-terminal pro b-type  
Natriuretic Peptide  
(NT-proBNP), ng/l  
R = 0.47, P,adj = 8.5e-06

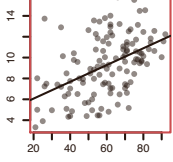

Creatine Kinase MB, % of  
Creatine Kinase  
R = 0.42, P,adj = 0.011

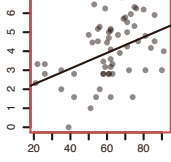

Antithrombin activity %  
R = -0.37, P,adj = 0.033

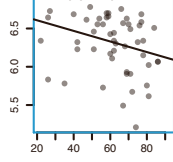

Interleukin-6, ng/l  
R = 0.31, P,adj = 0.02

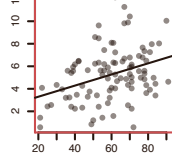

Troponin T HS, ng/l  
R = 0.58, P,adj = 7.7e-05

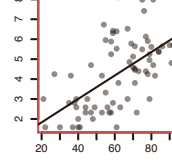

Neutrophil-to-lymphocyte  
ratio  
R = 0.39, P,adj = 0.00033

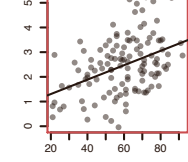

Charlson score  
R = 0.79, P,adj = 2e-24

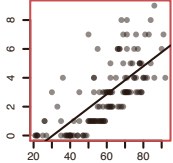

Figure S10 (following 9 pages). Plasma protein levels vs age in general population based on Generation Scotland cohort

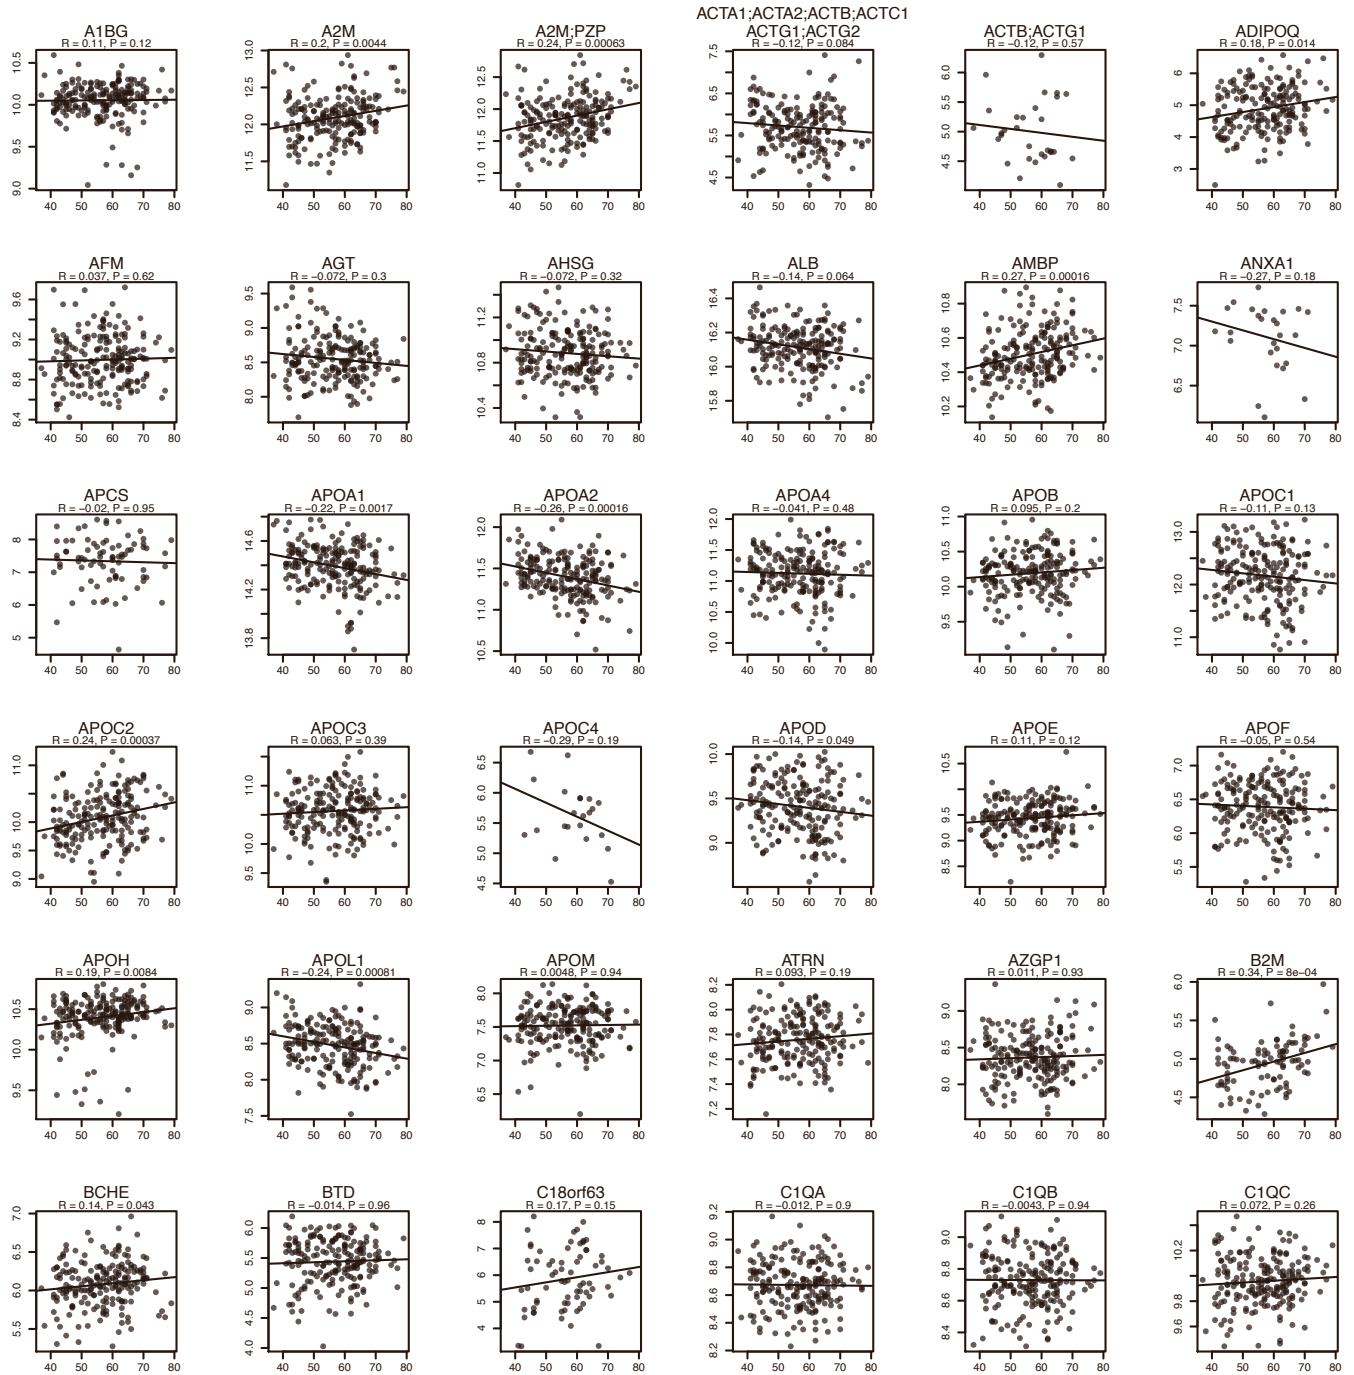



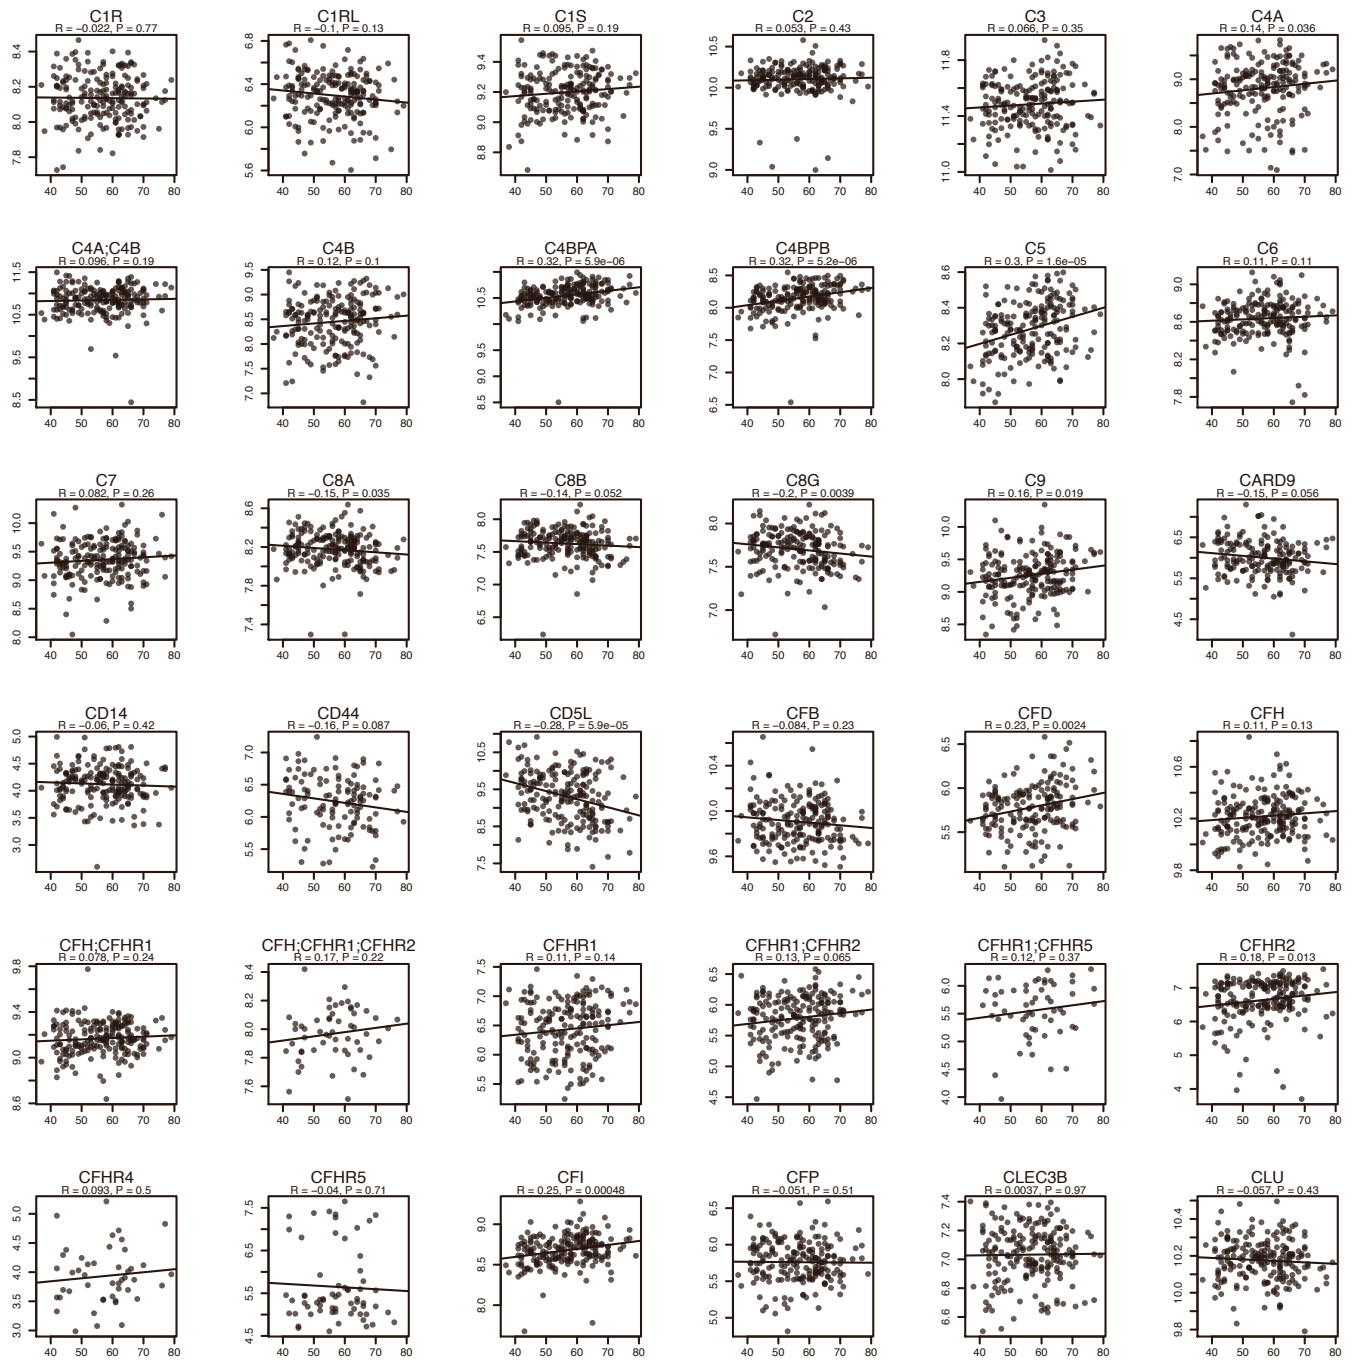

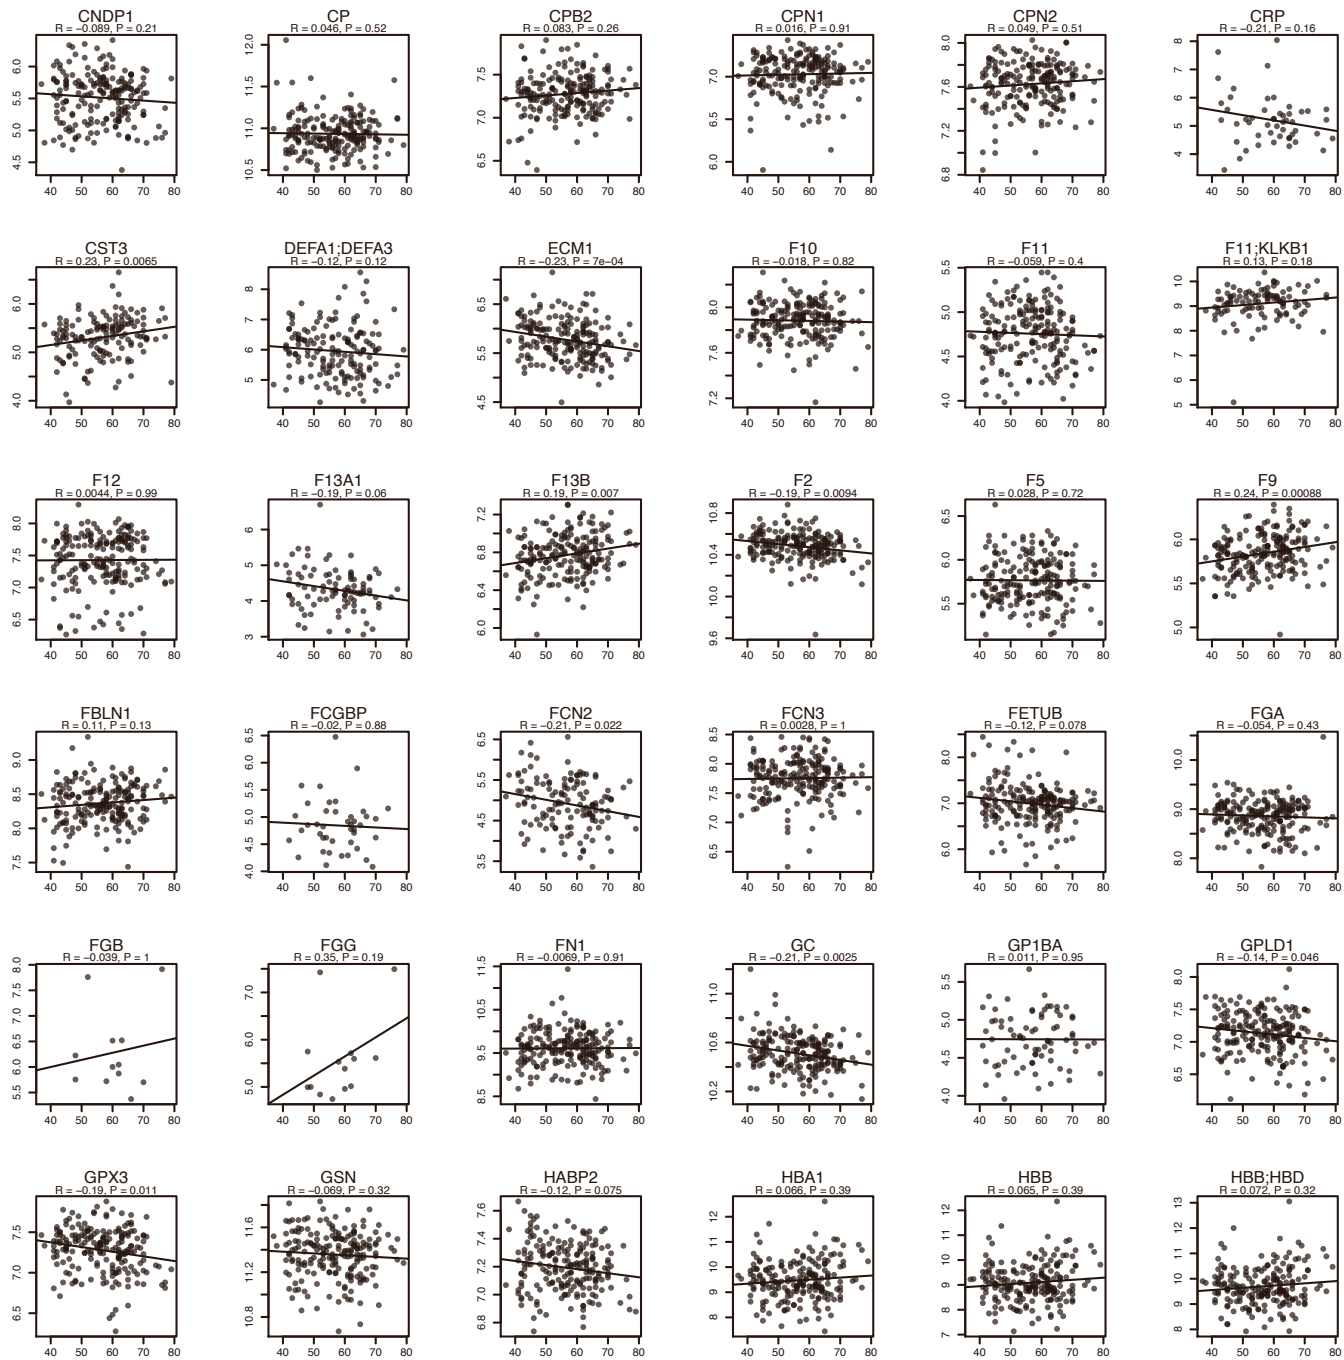

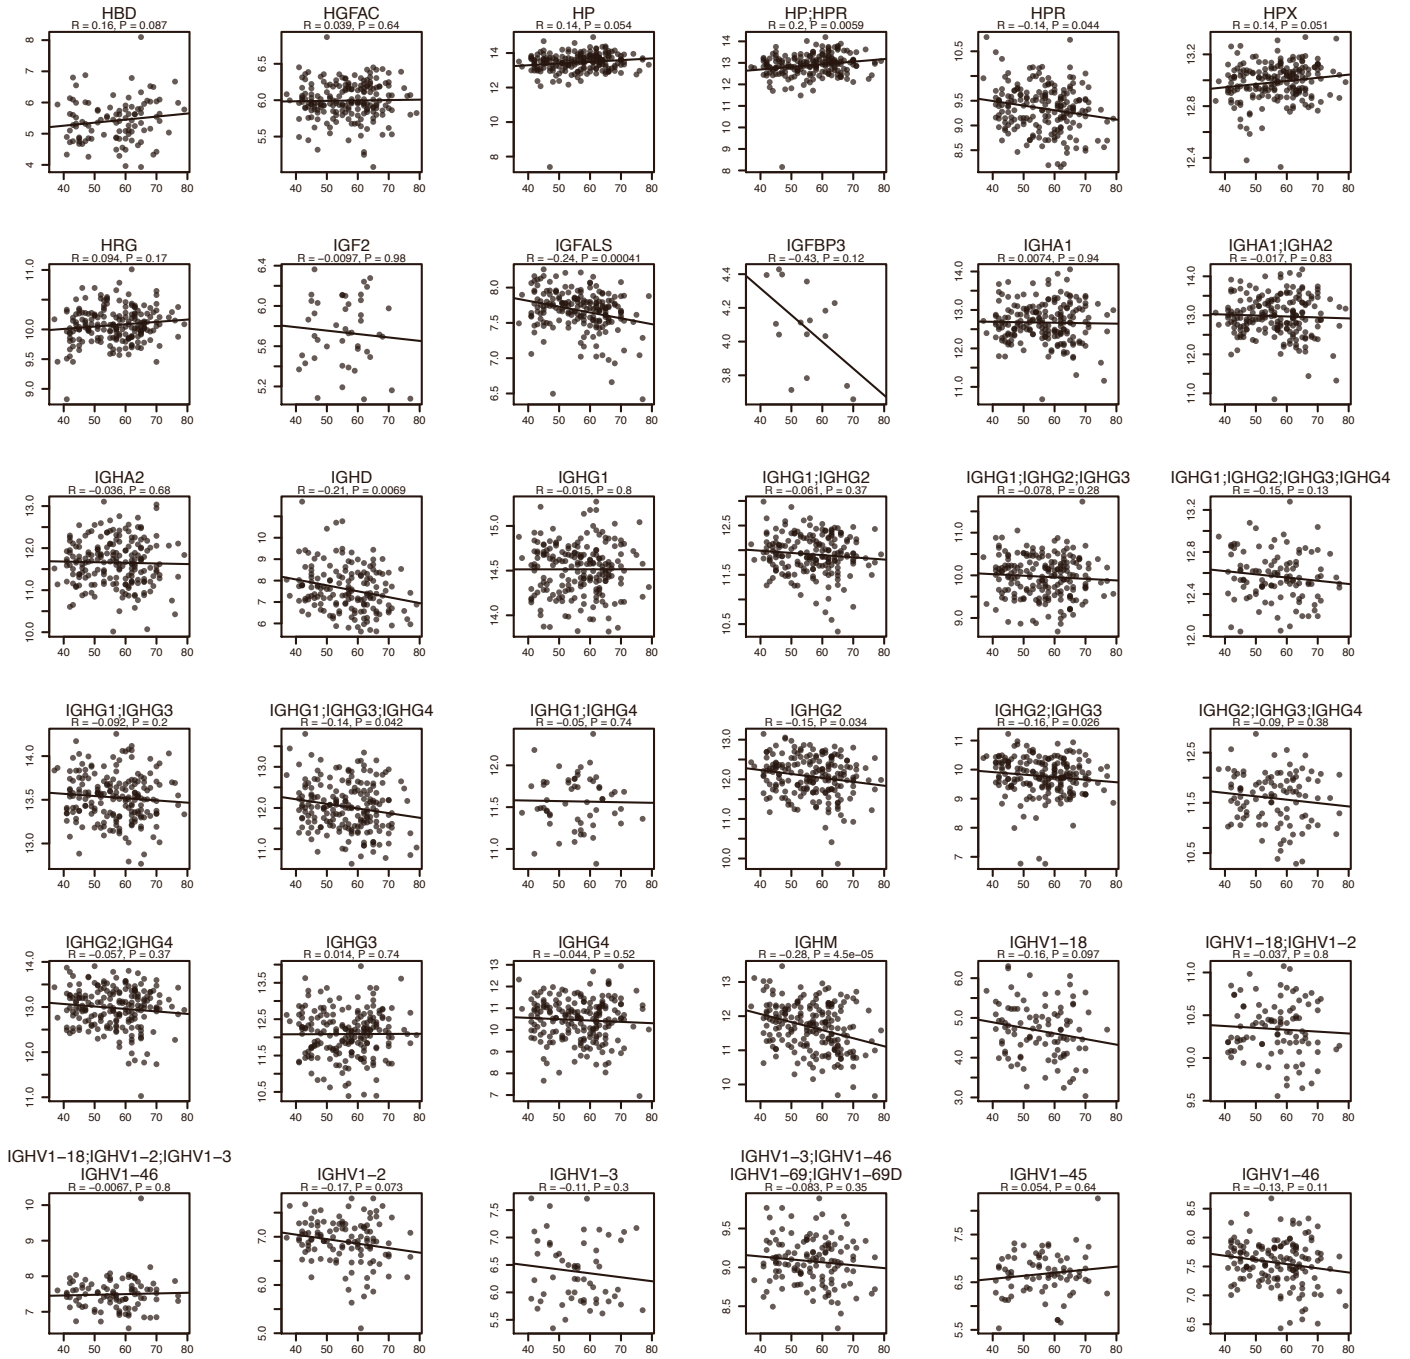

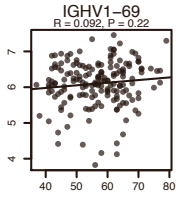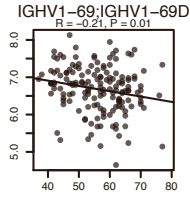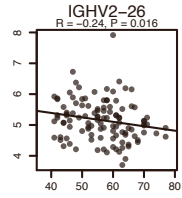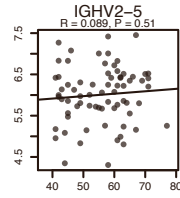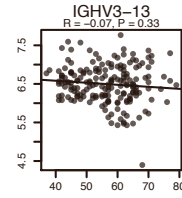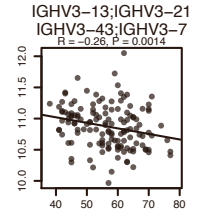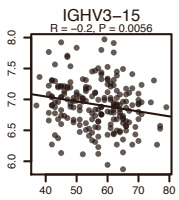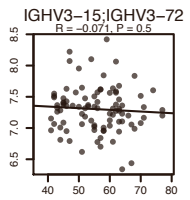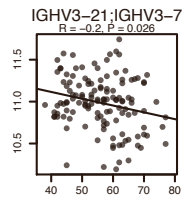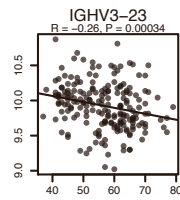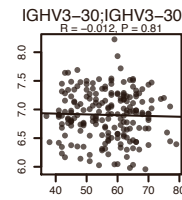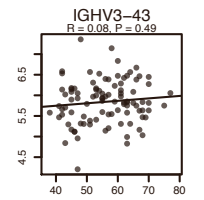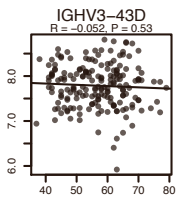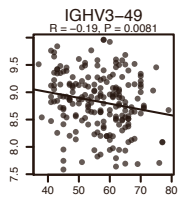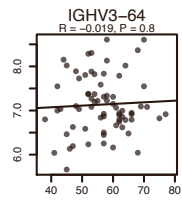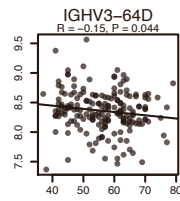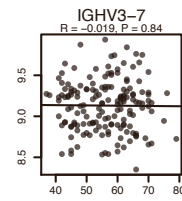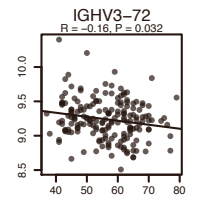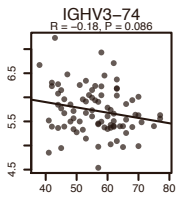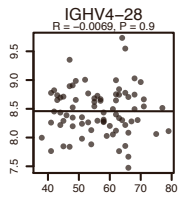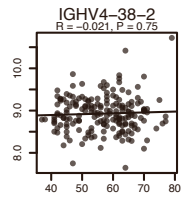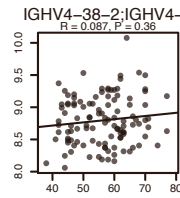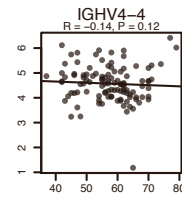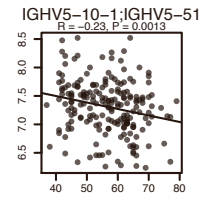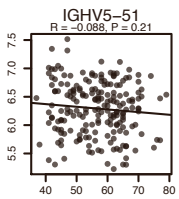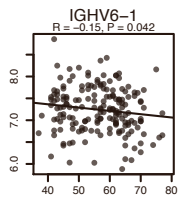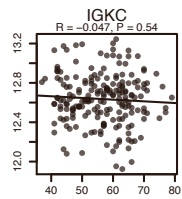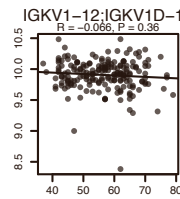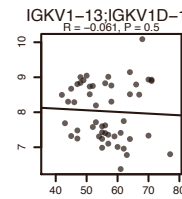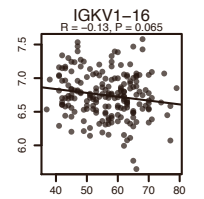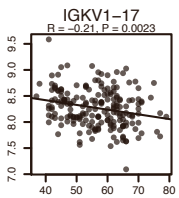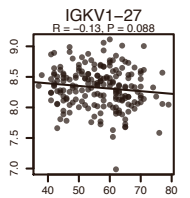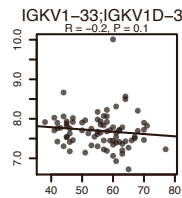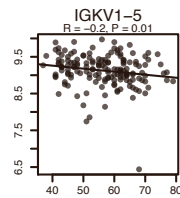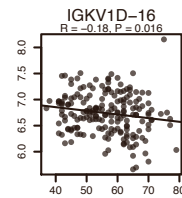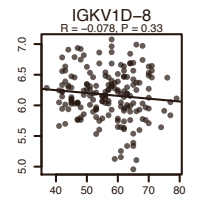

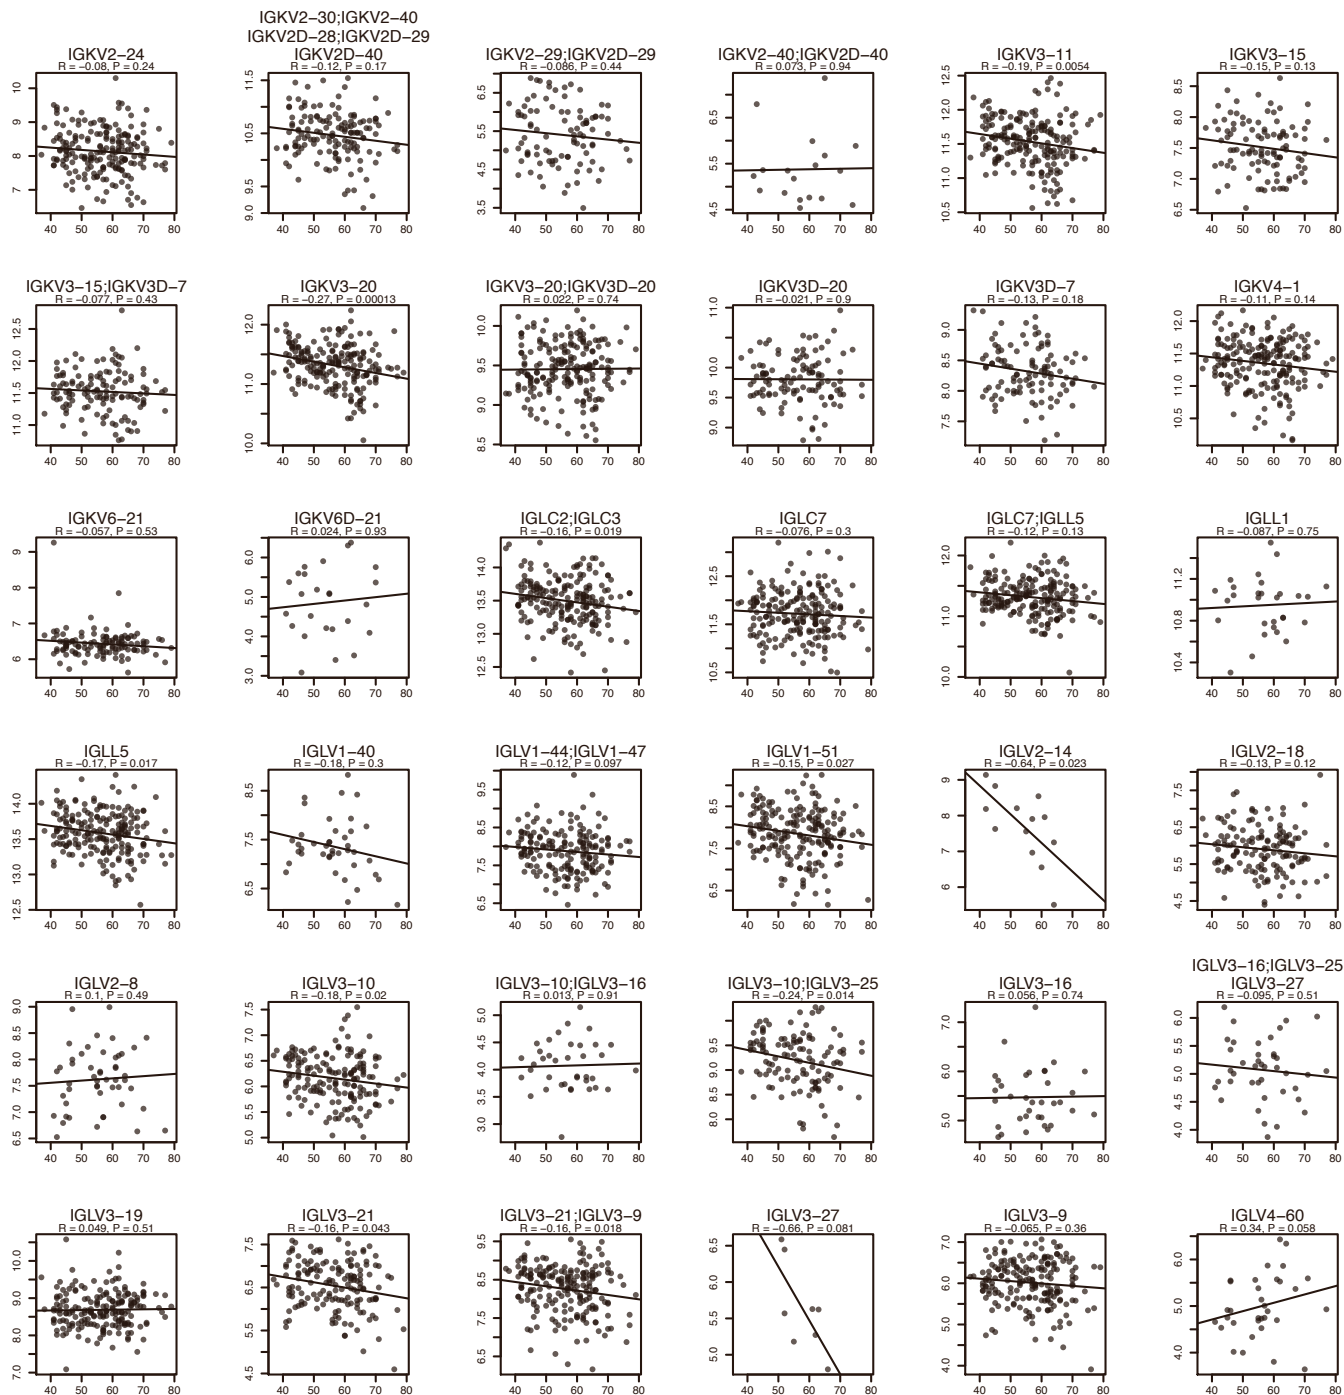

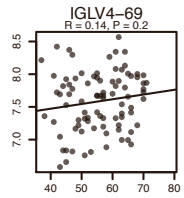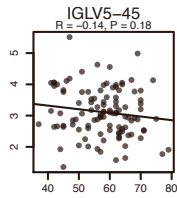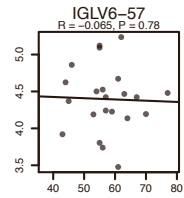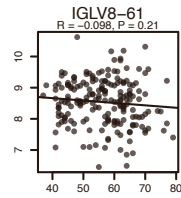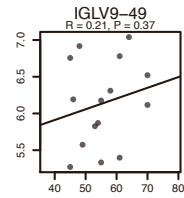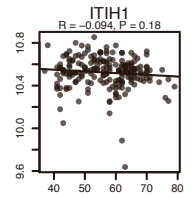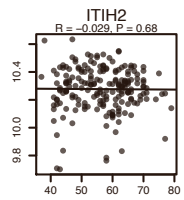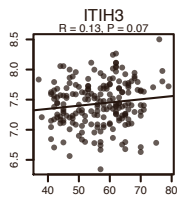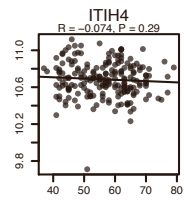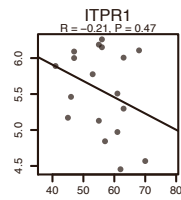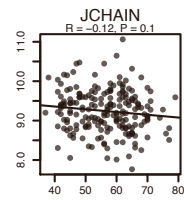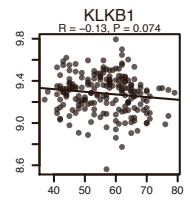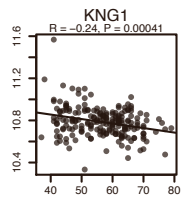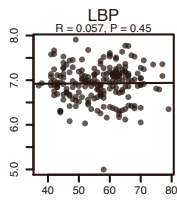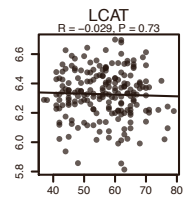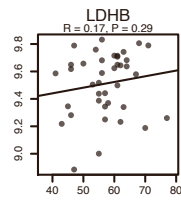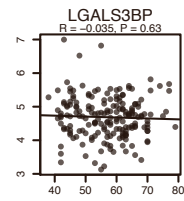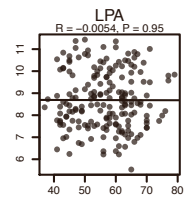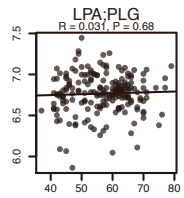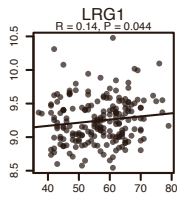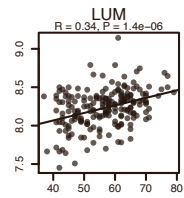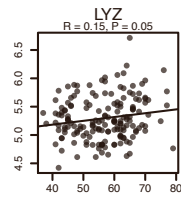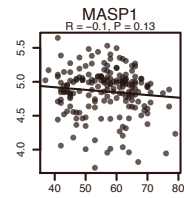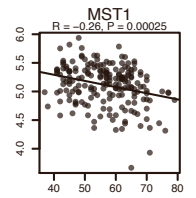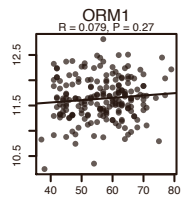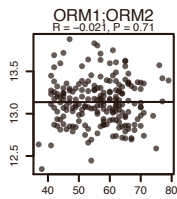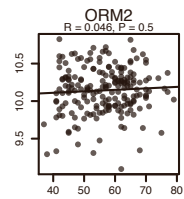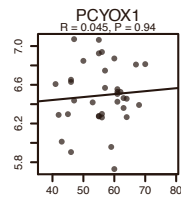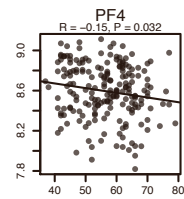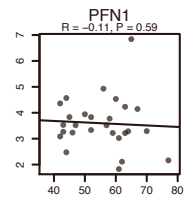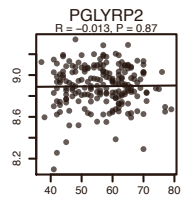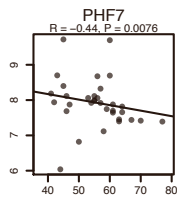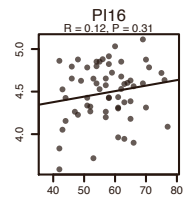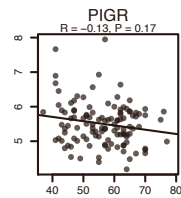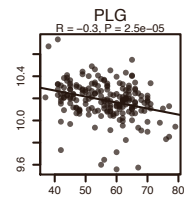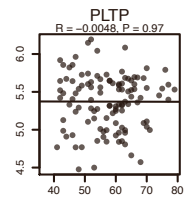



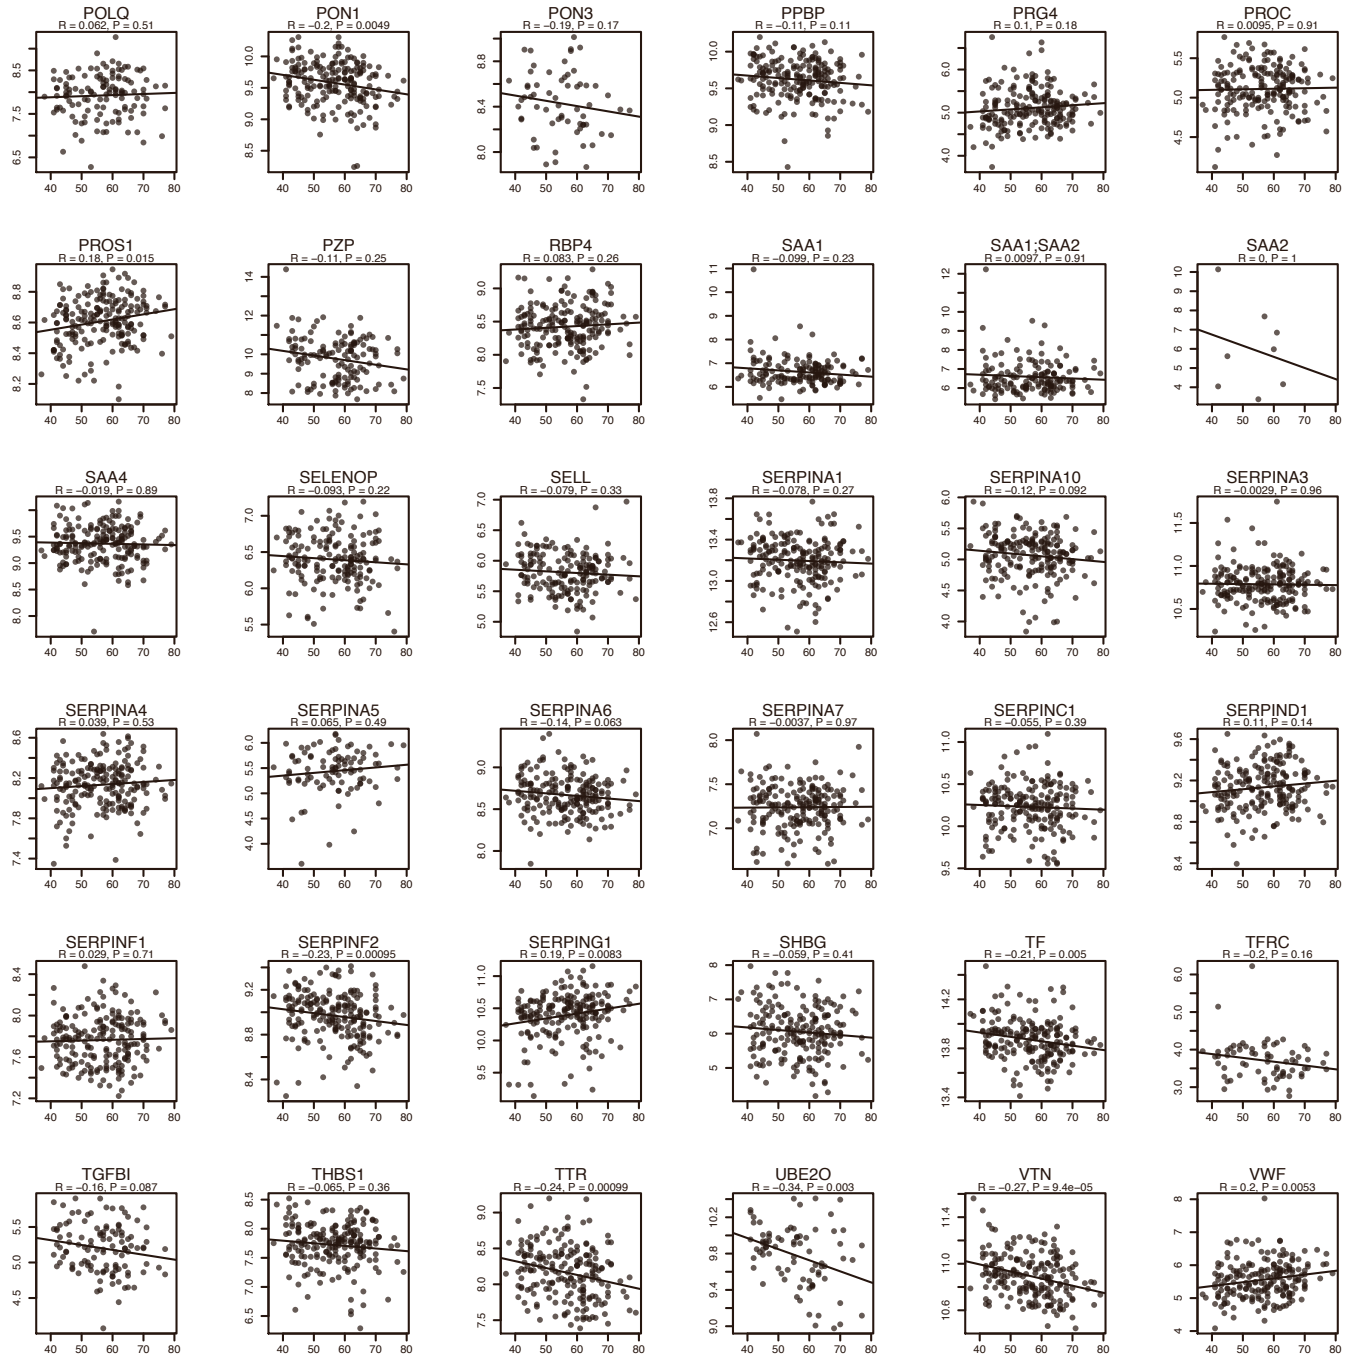

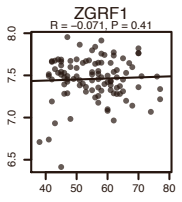



Figure S11 (following 2 pages). Omics features significantly regulated depending on age

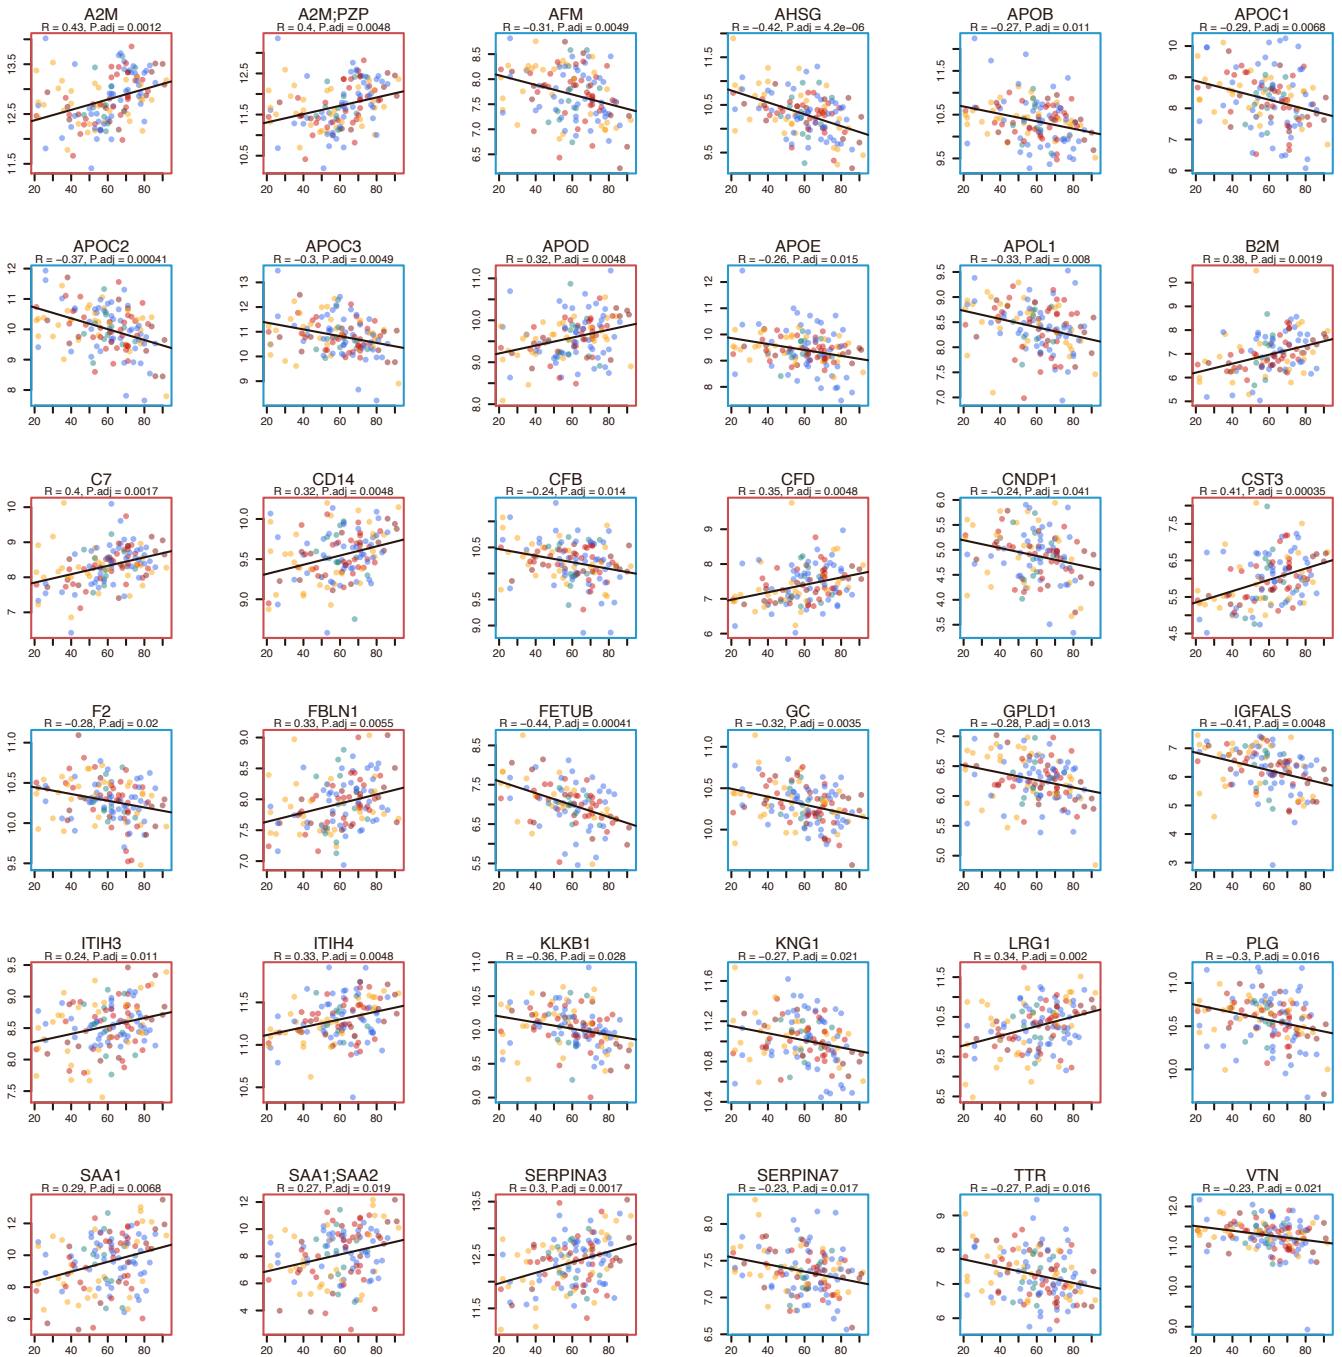

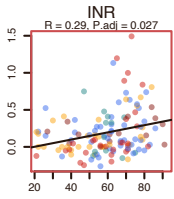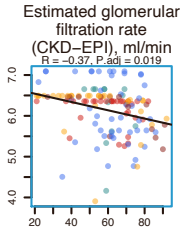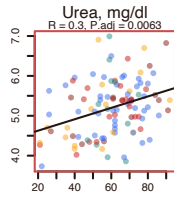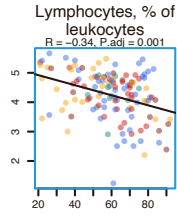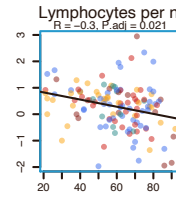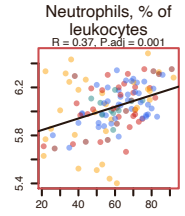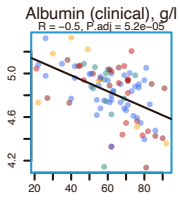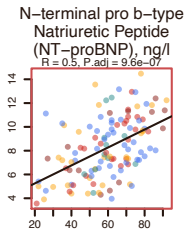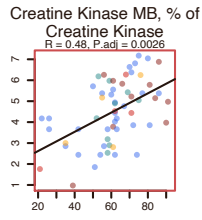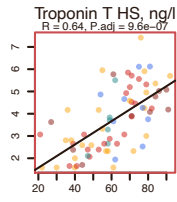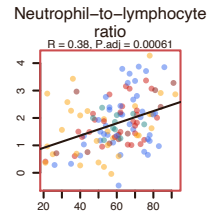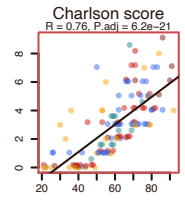

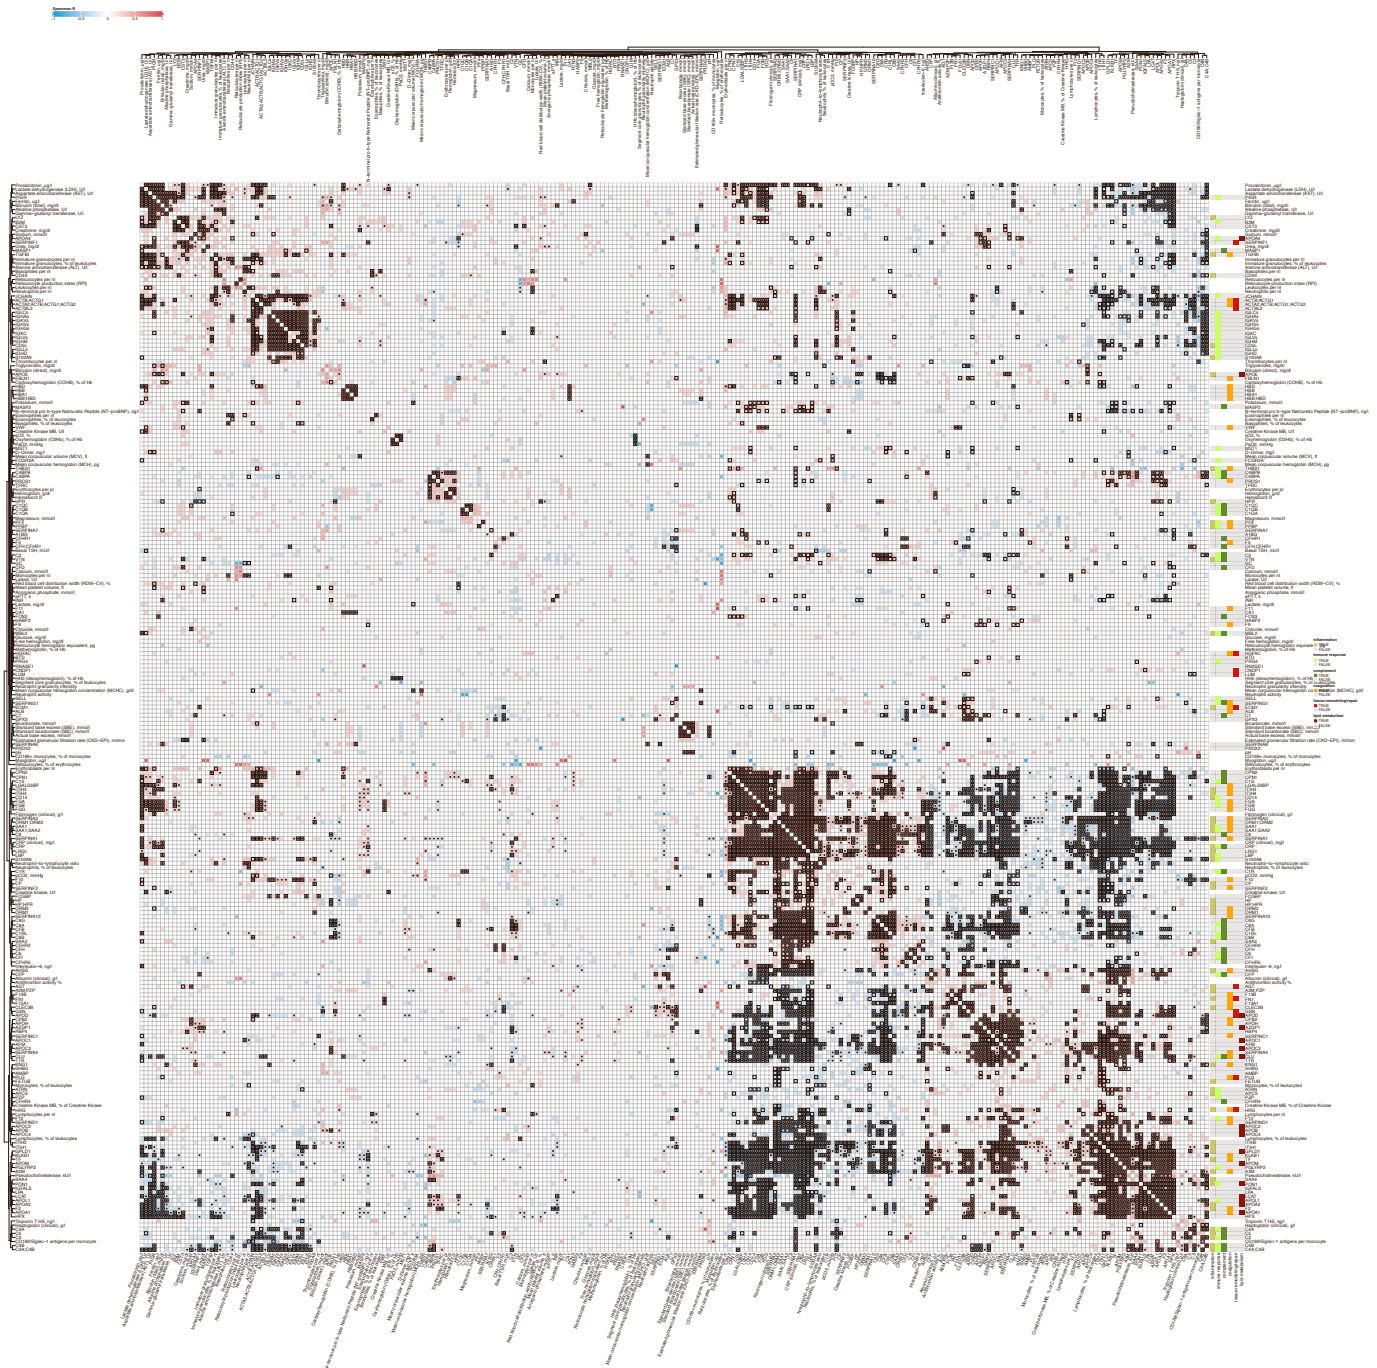

Figure S12. Map of correlations between dynamic changes in omics measurements during the peak period of the disease

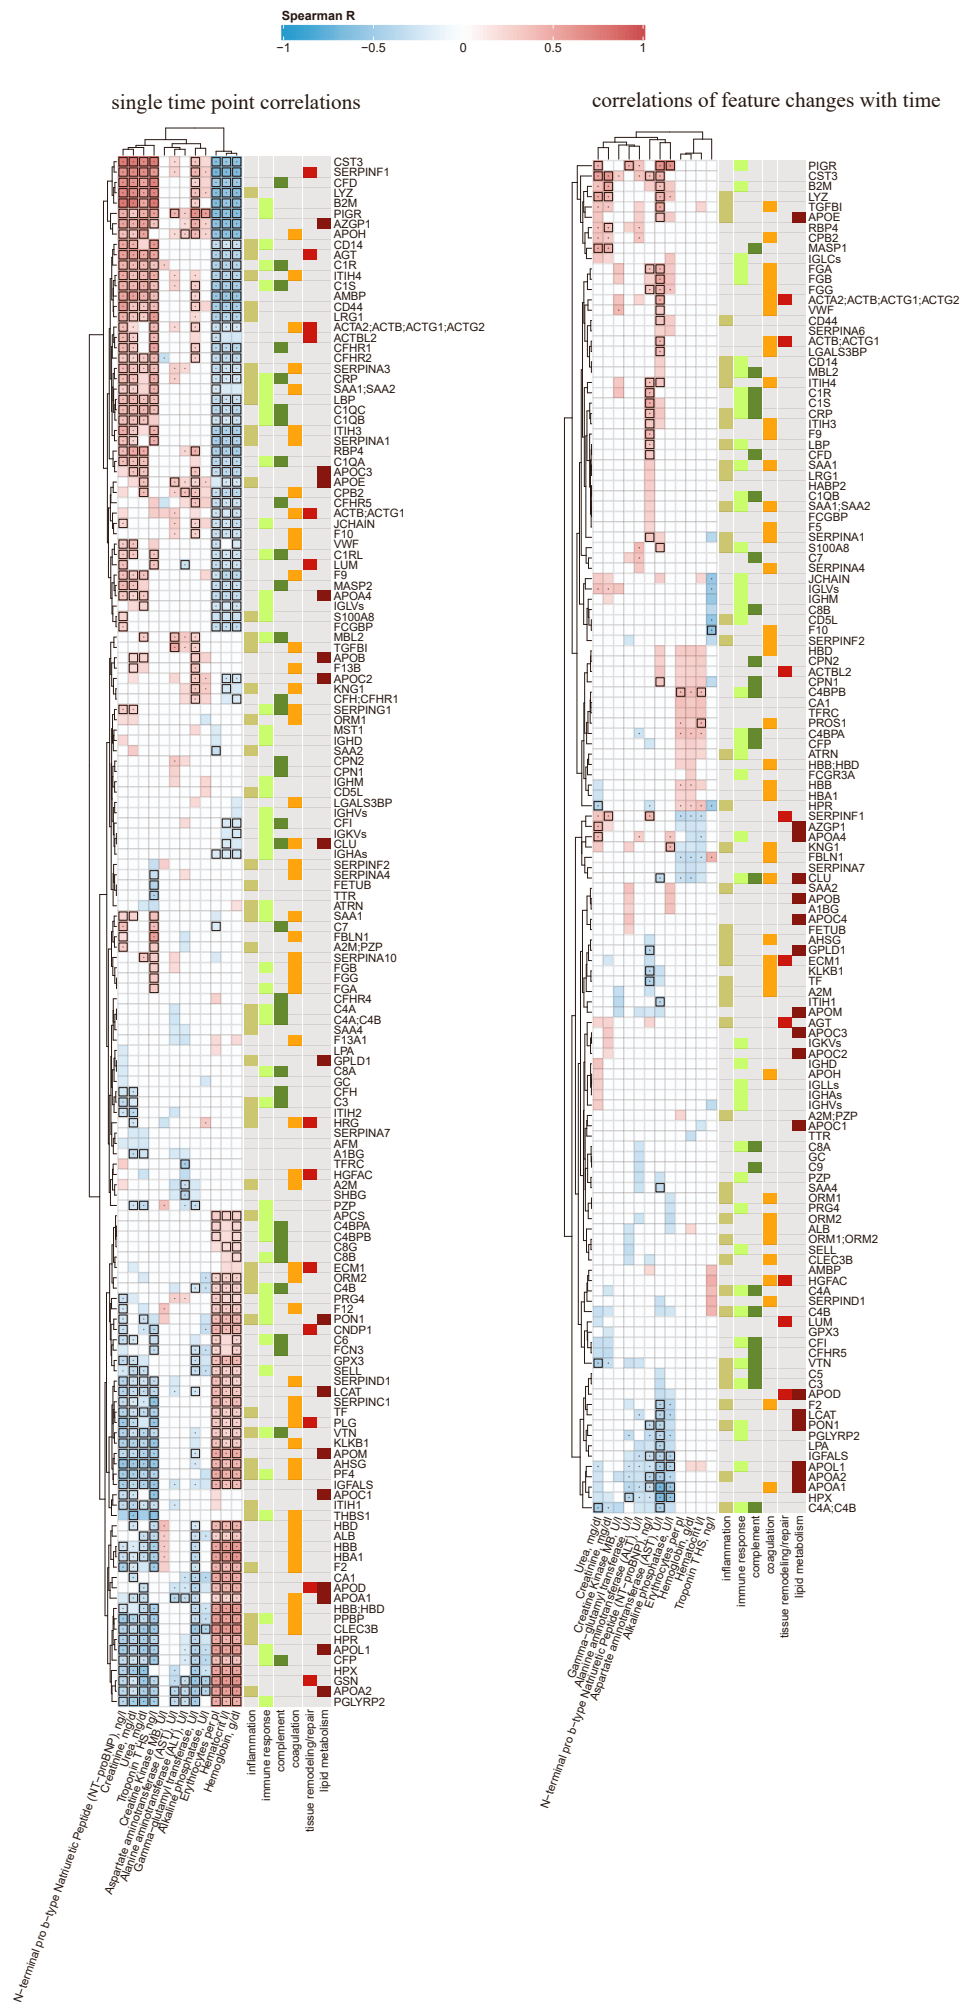

Figure S13. Covariation of organ function markers and plasma proteins

Figure S14 (following 4 pages). Omics features changing during the peak of the disease

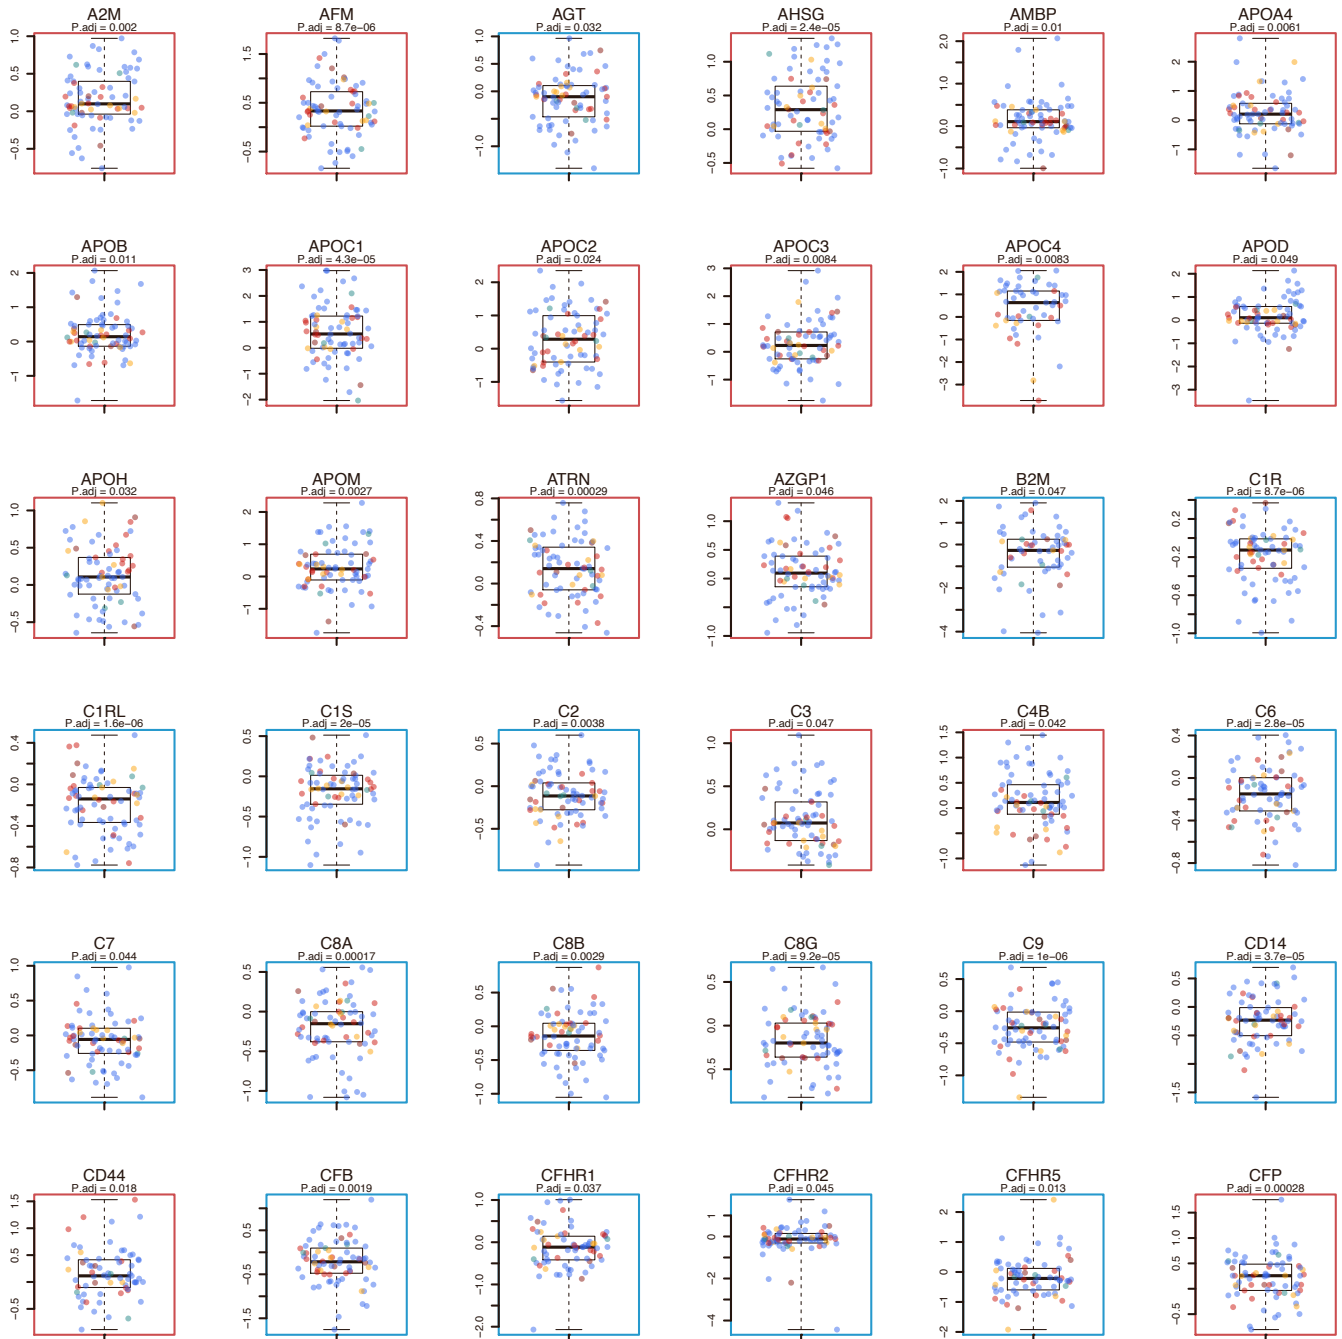

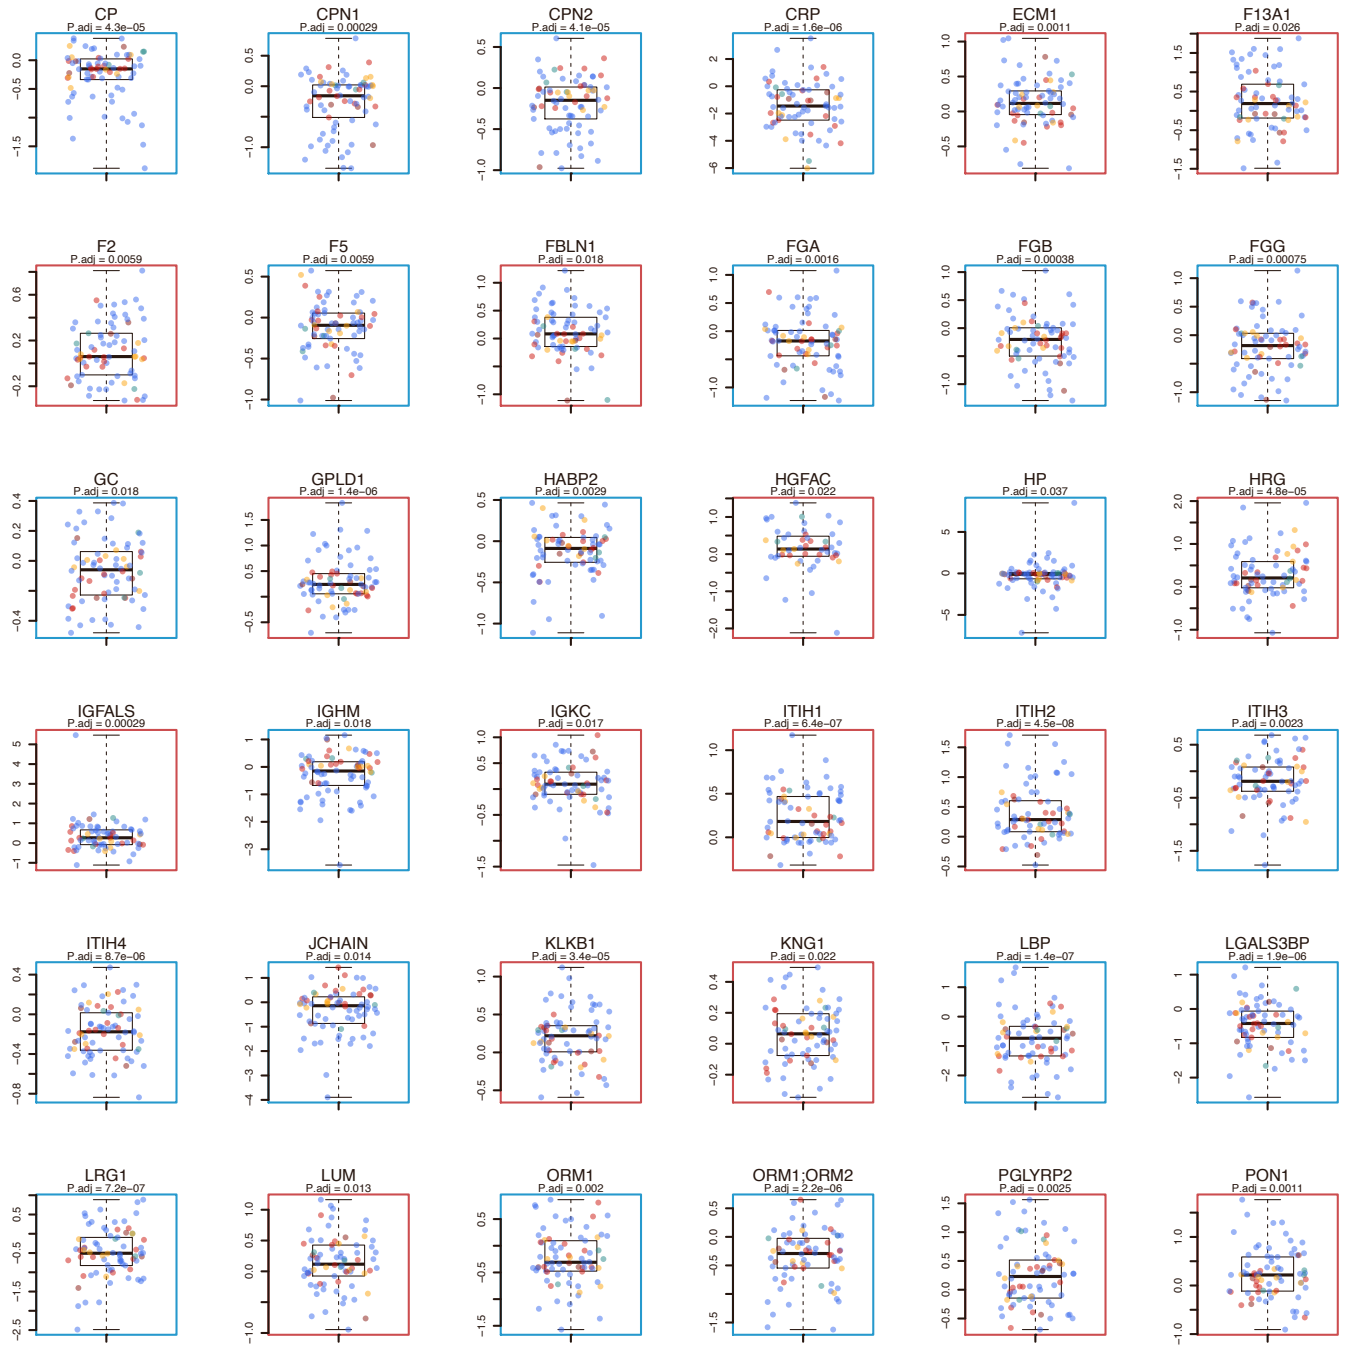

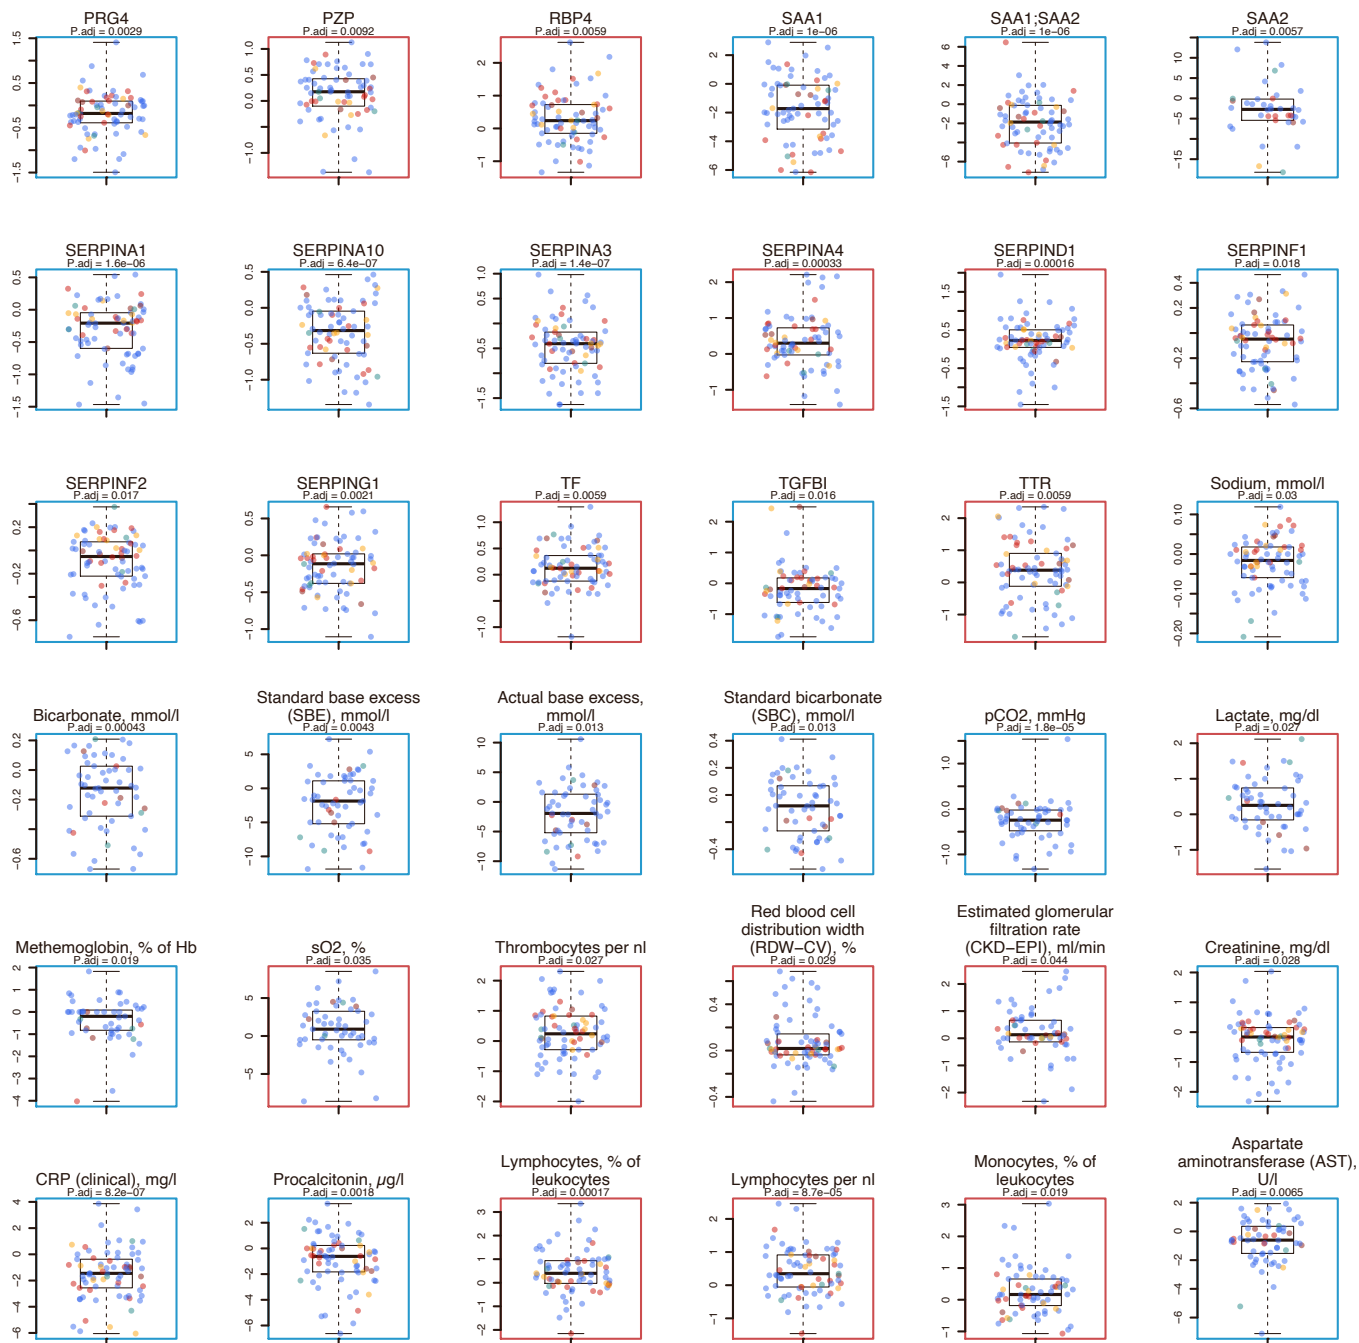



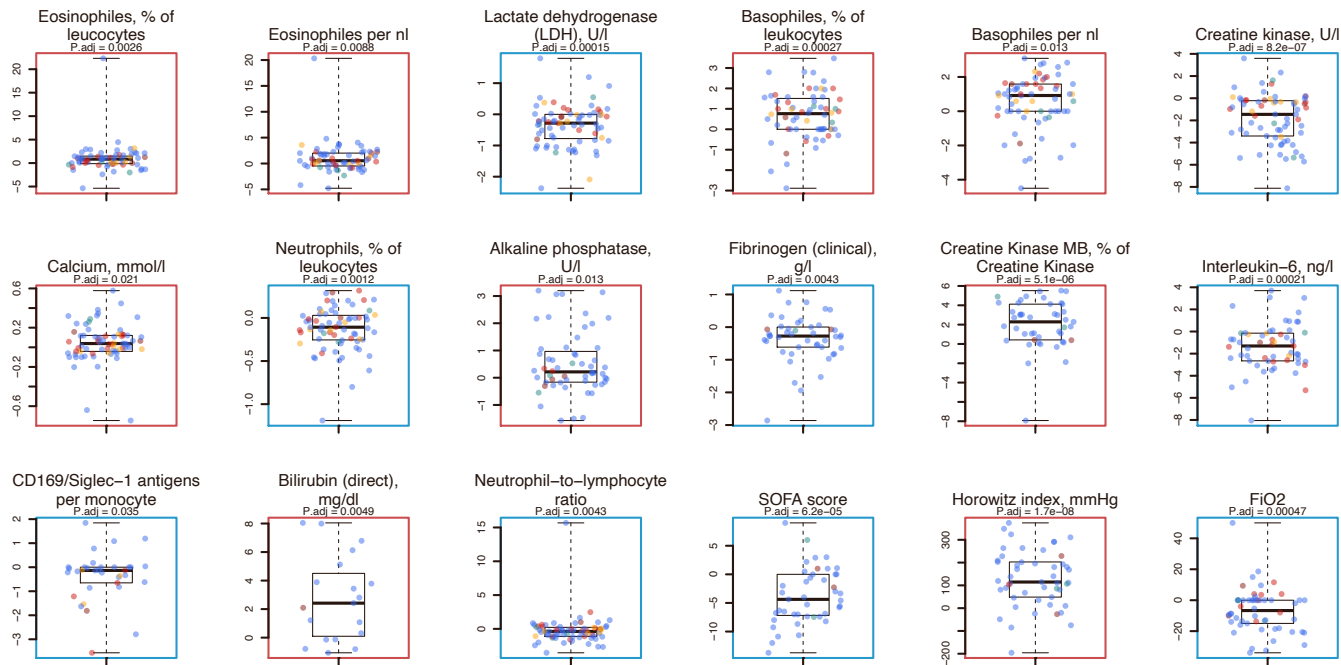



Figure S15. Omics features differentially changing during the peak of the disease depending on the severity

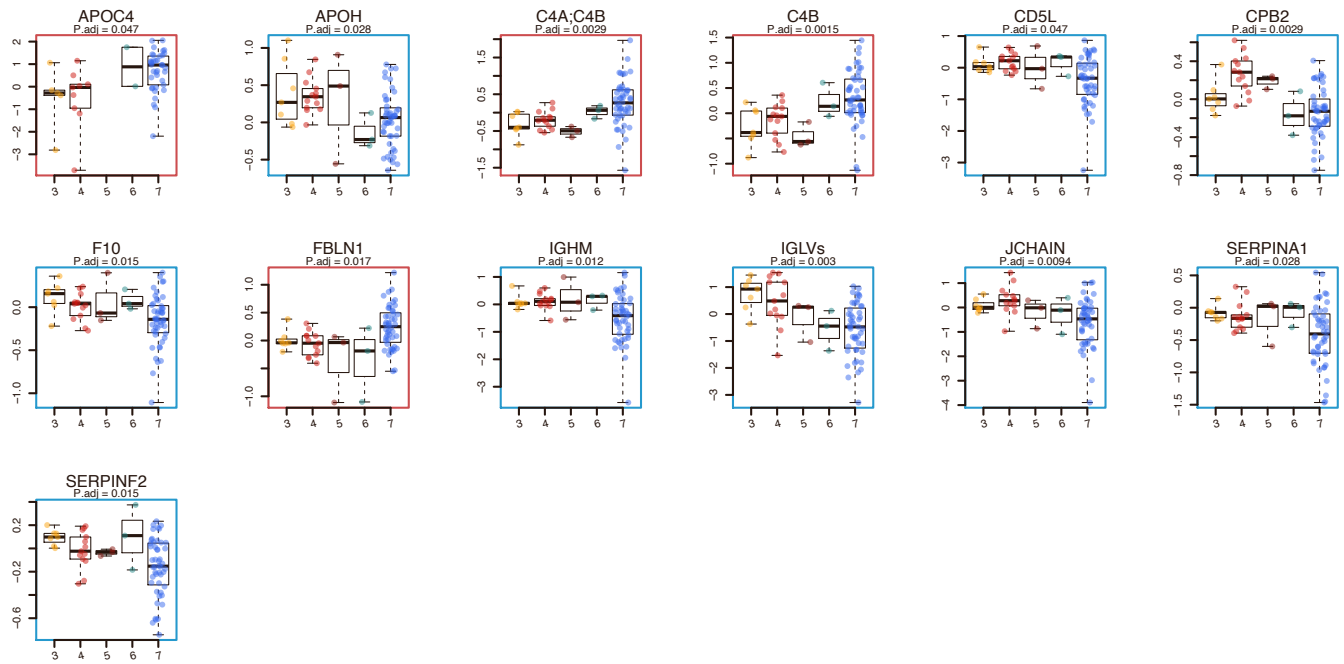

Figure S16 (following 9 pages). Trajectories at the peak of the disease

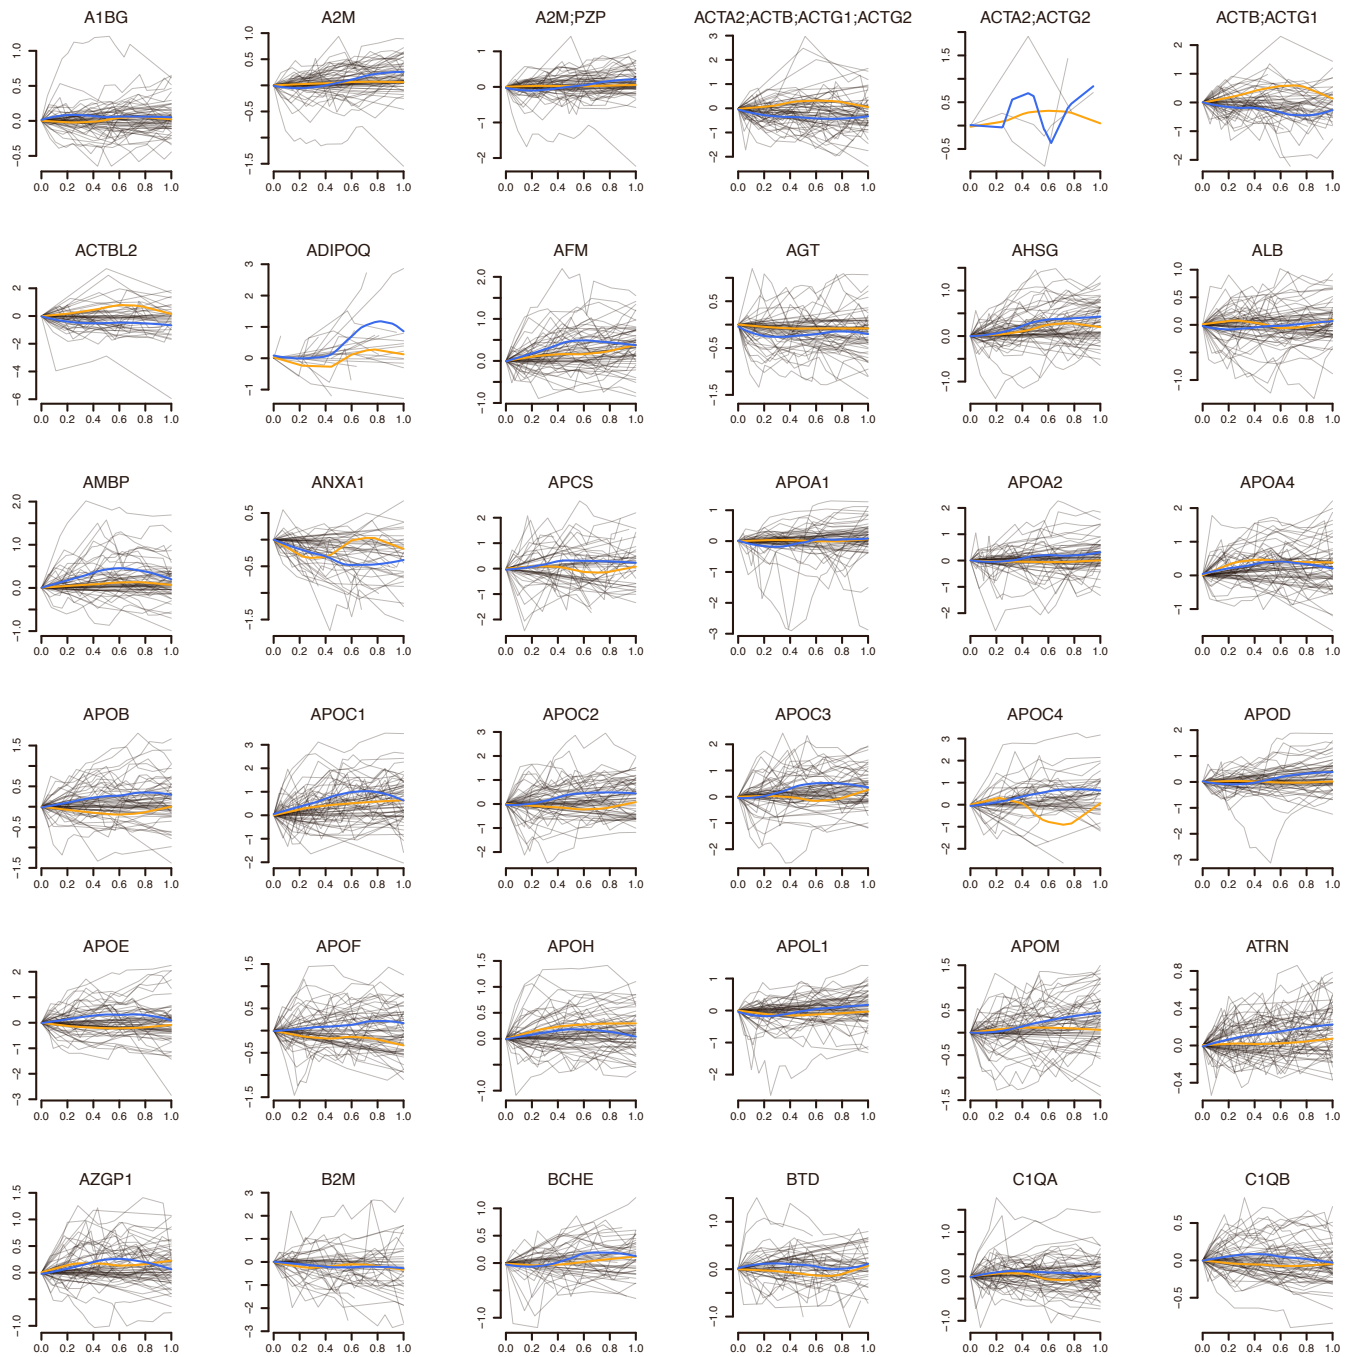

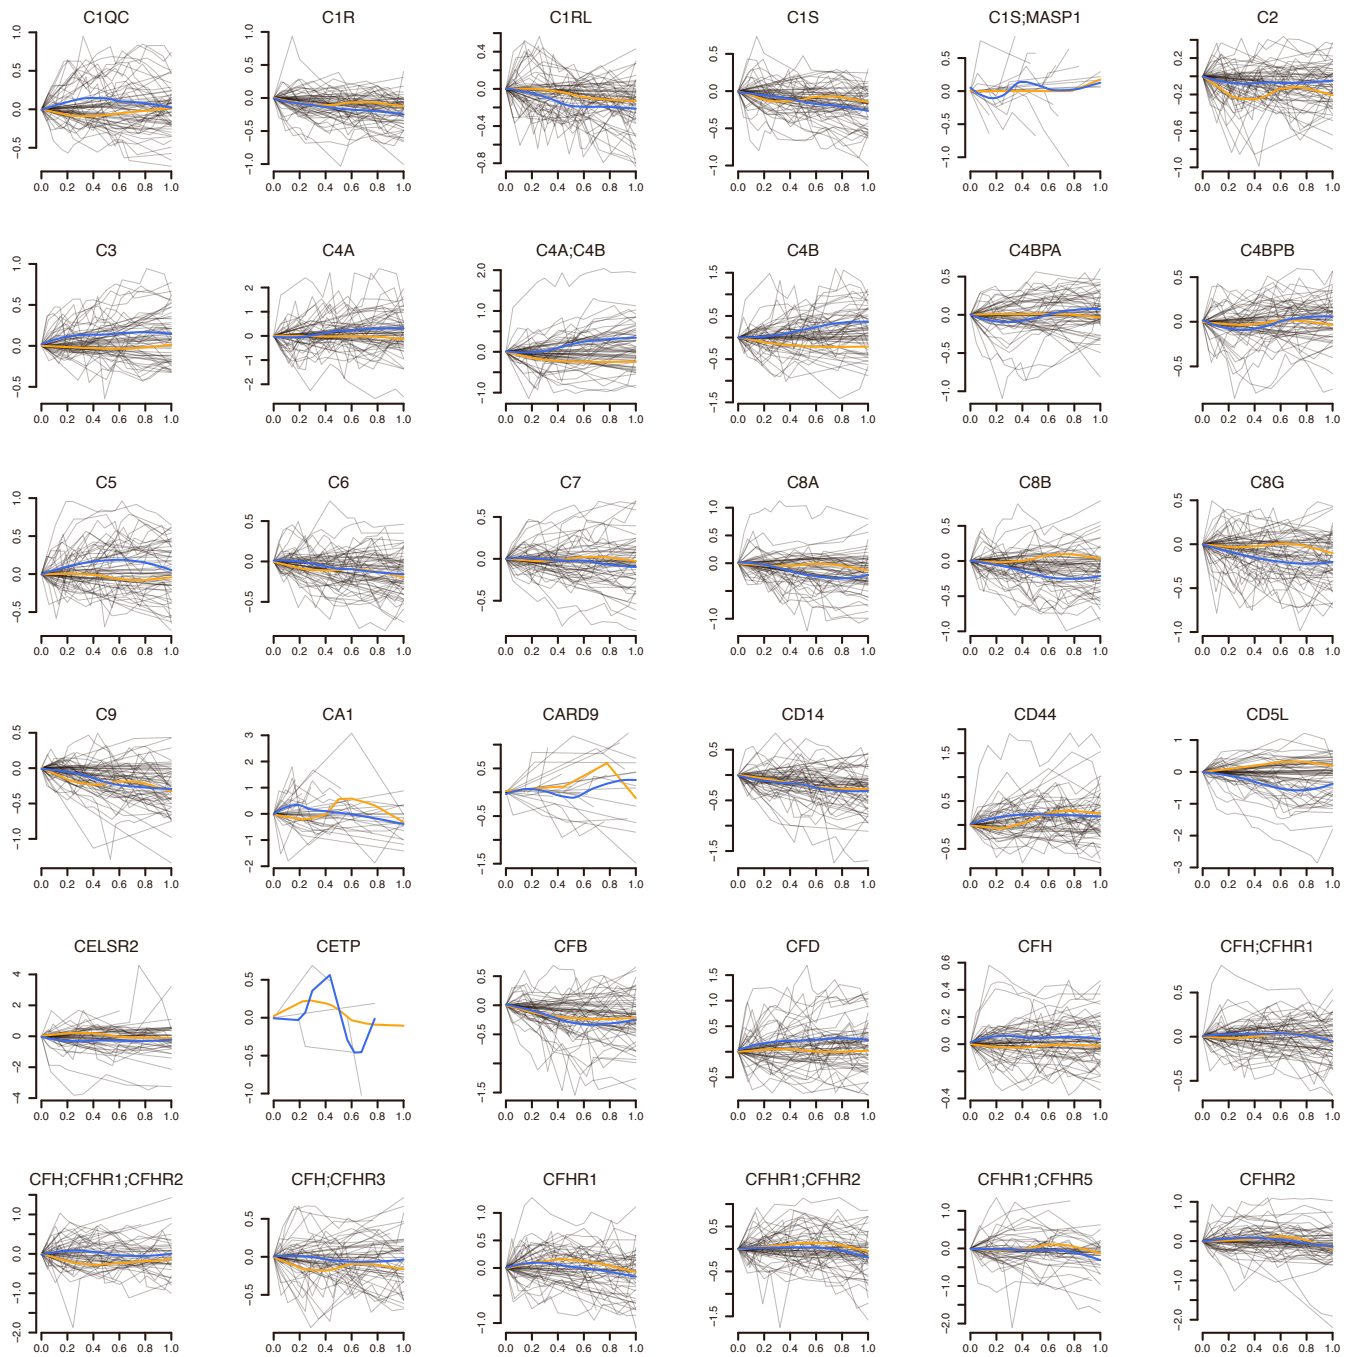

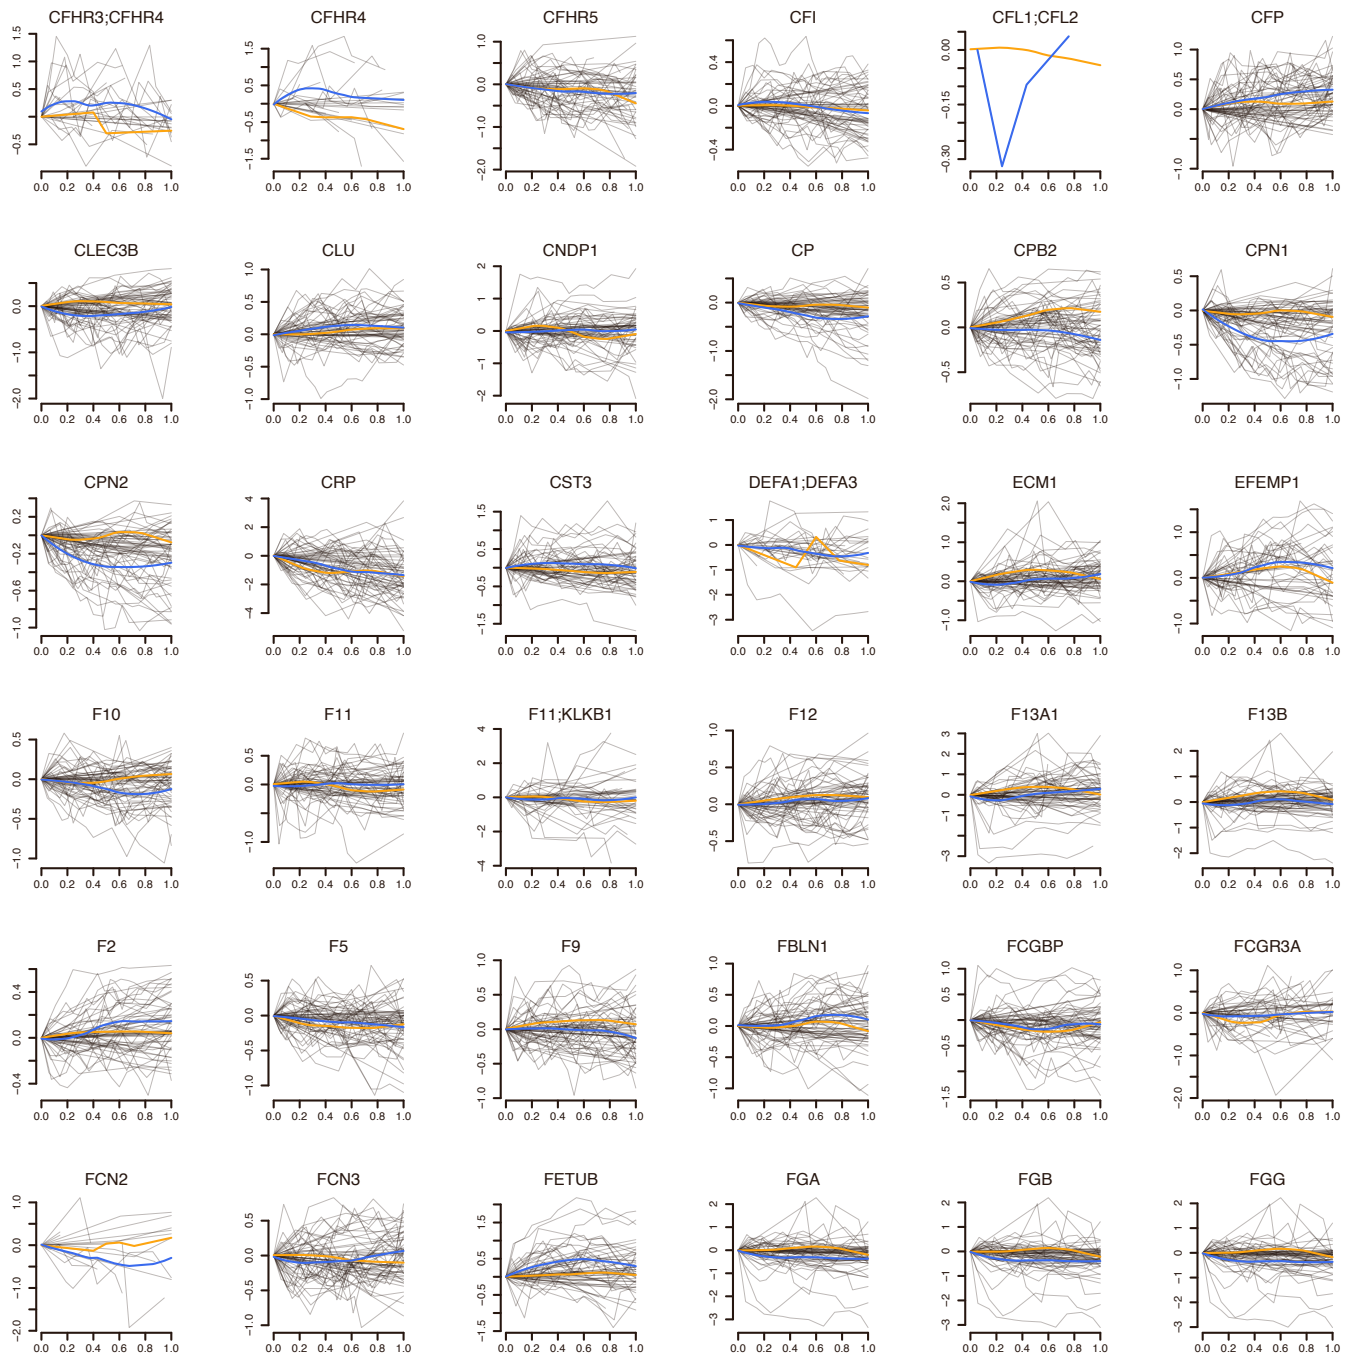

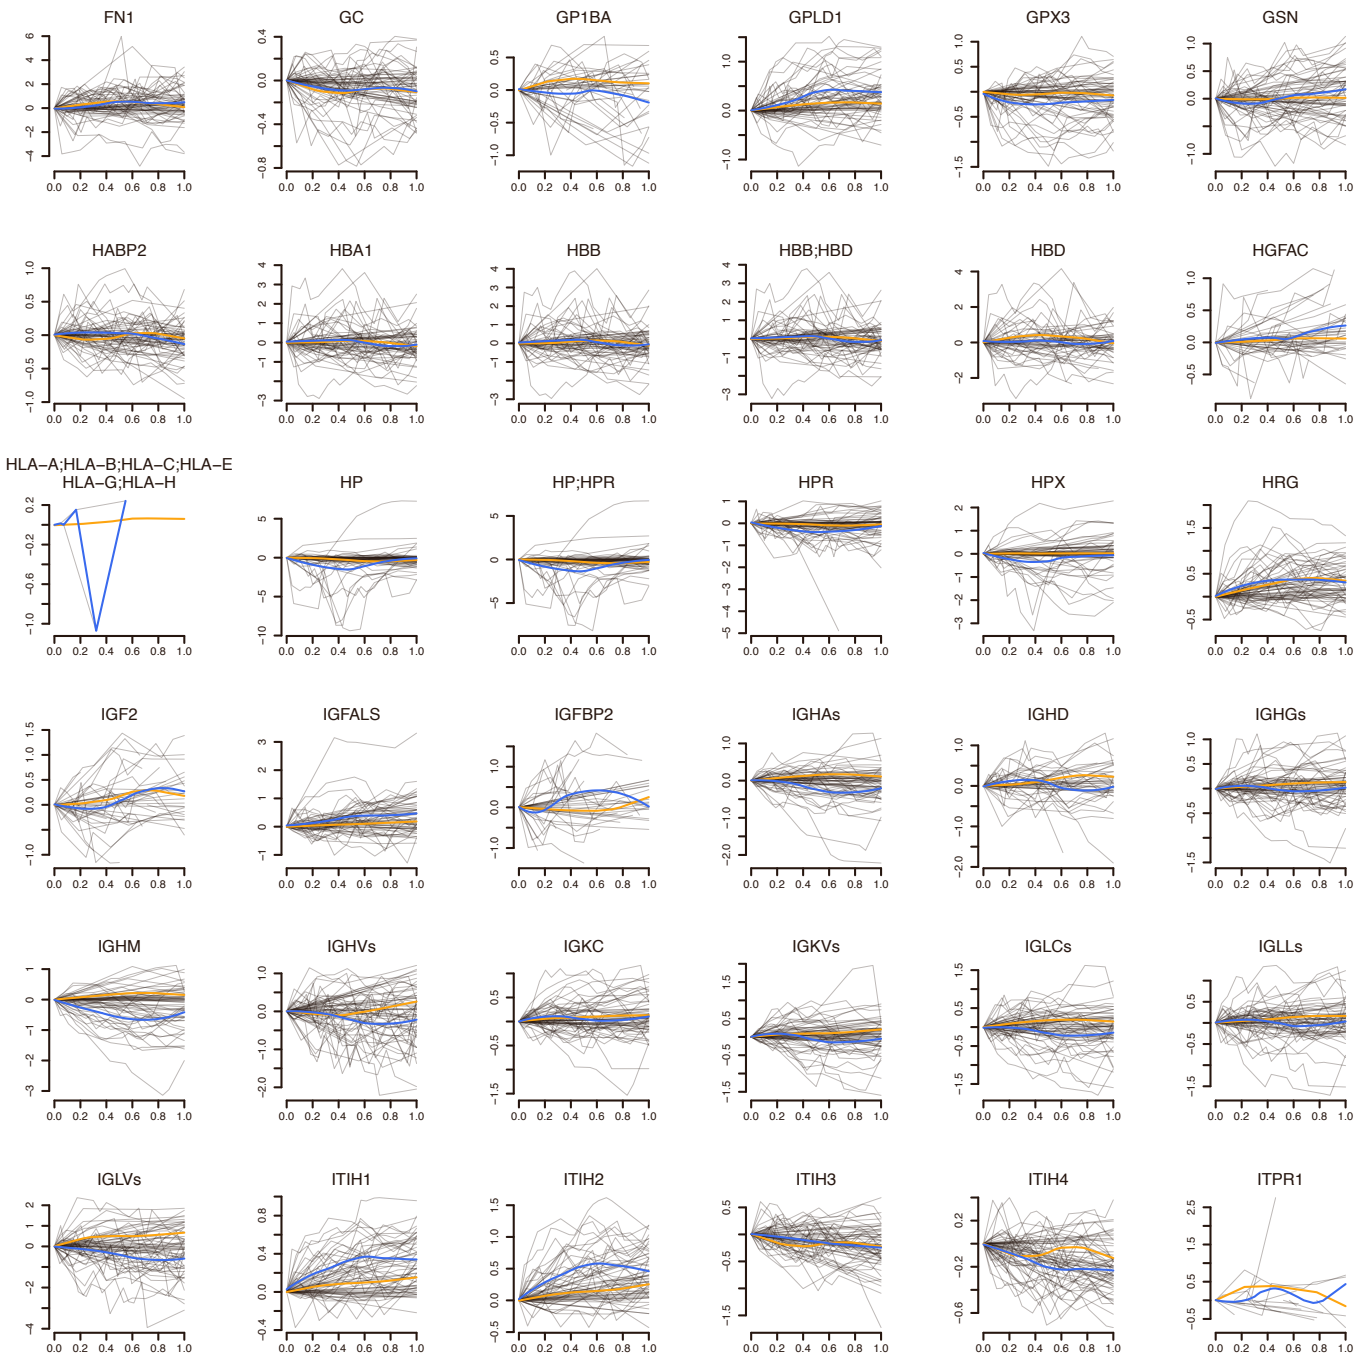



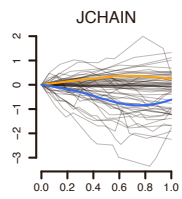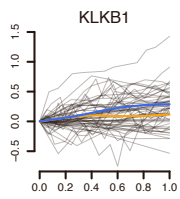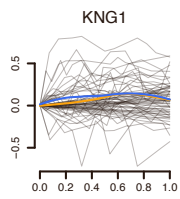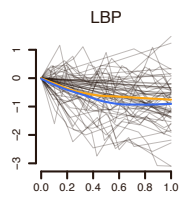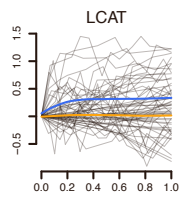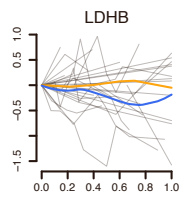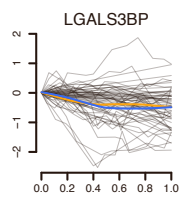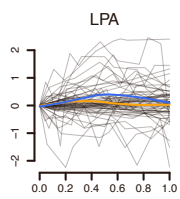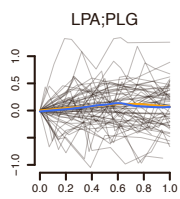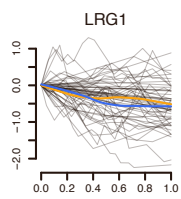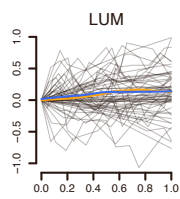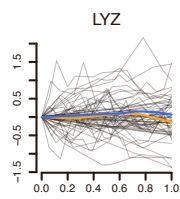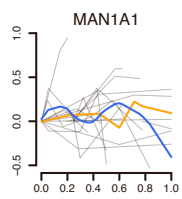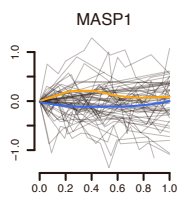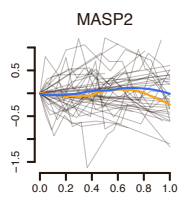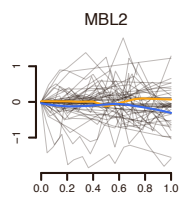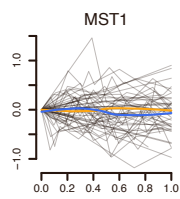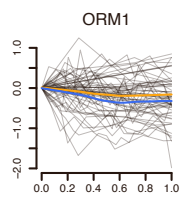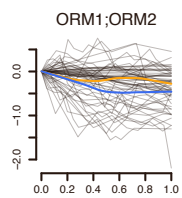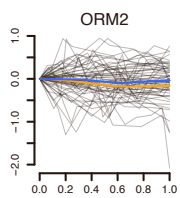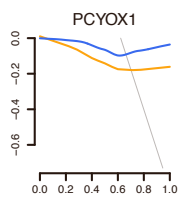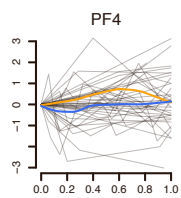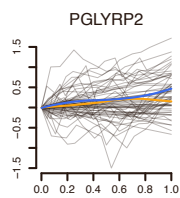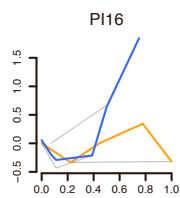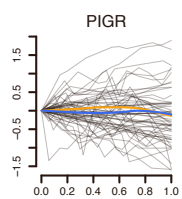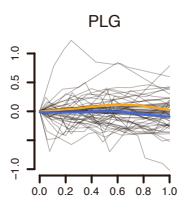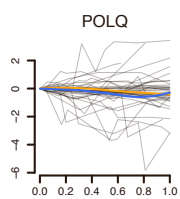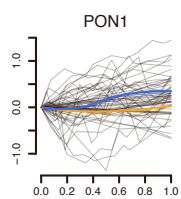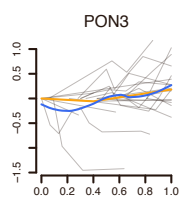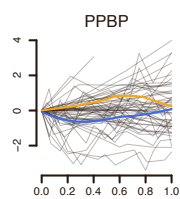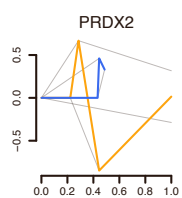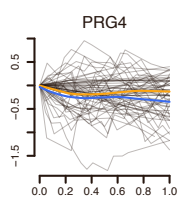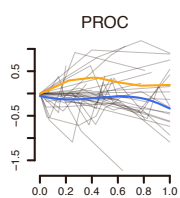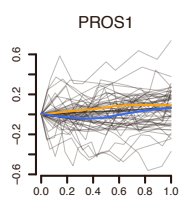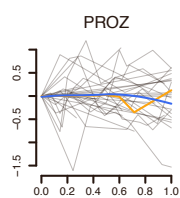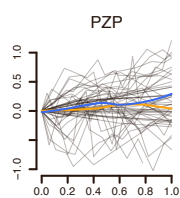

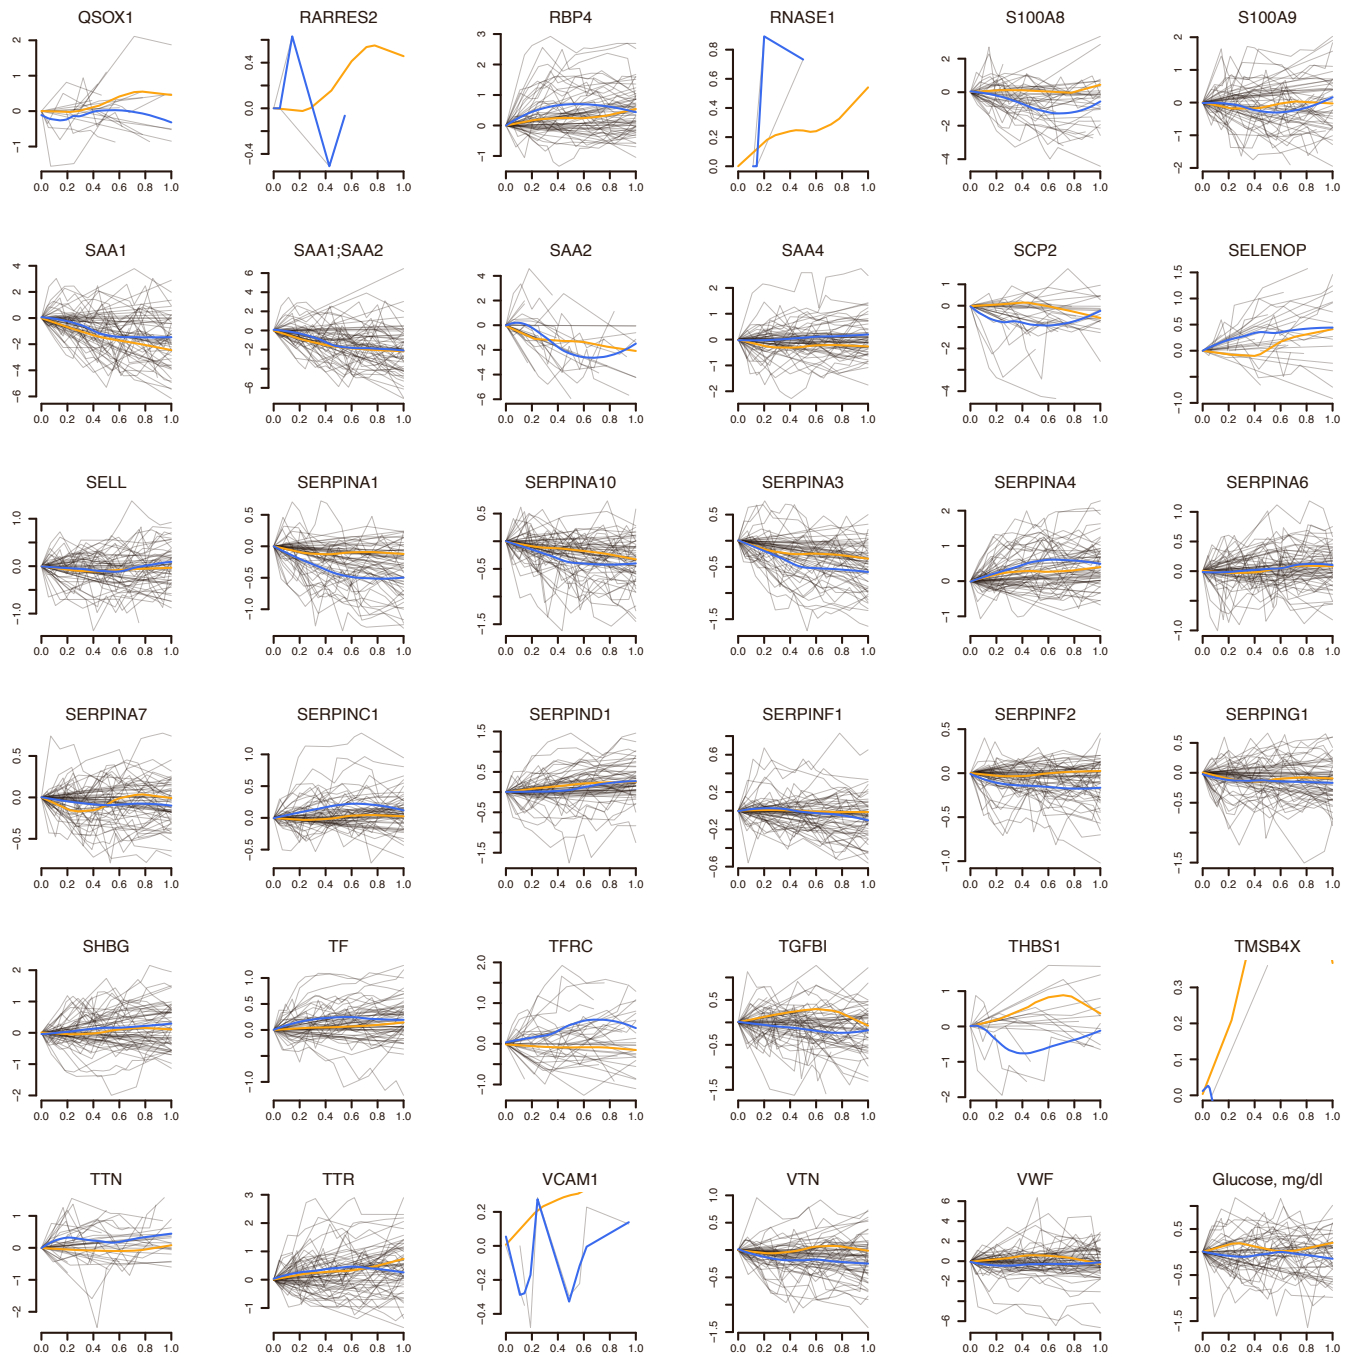



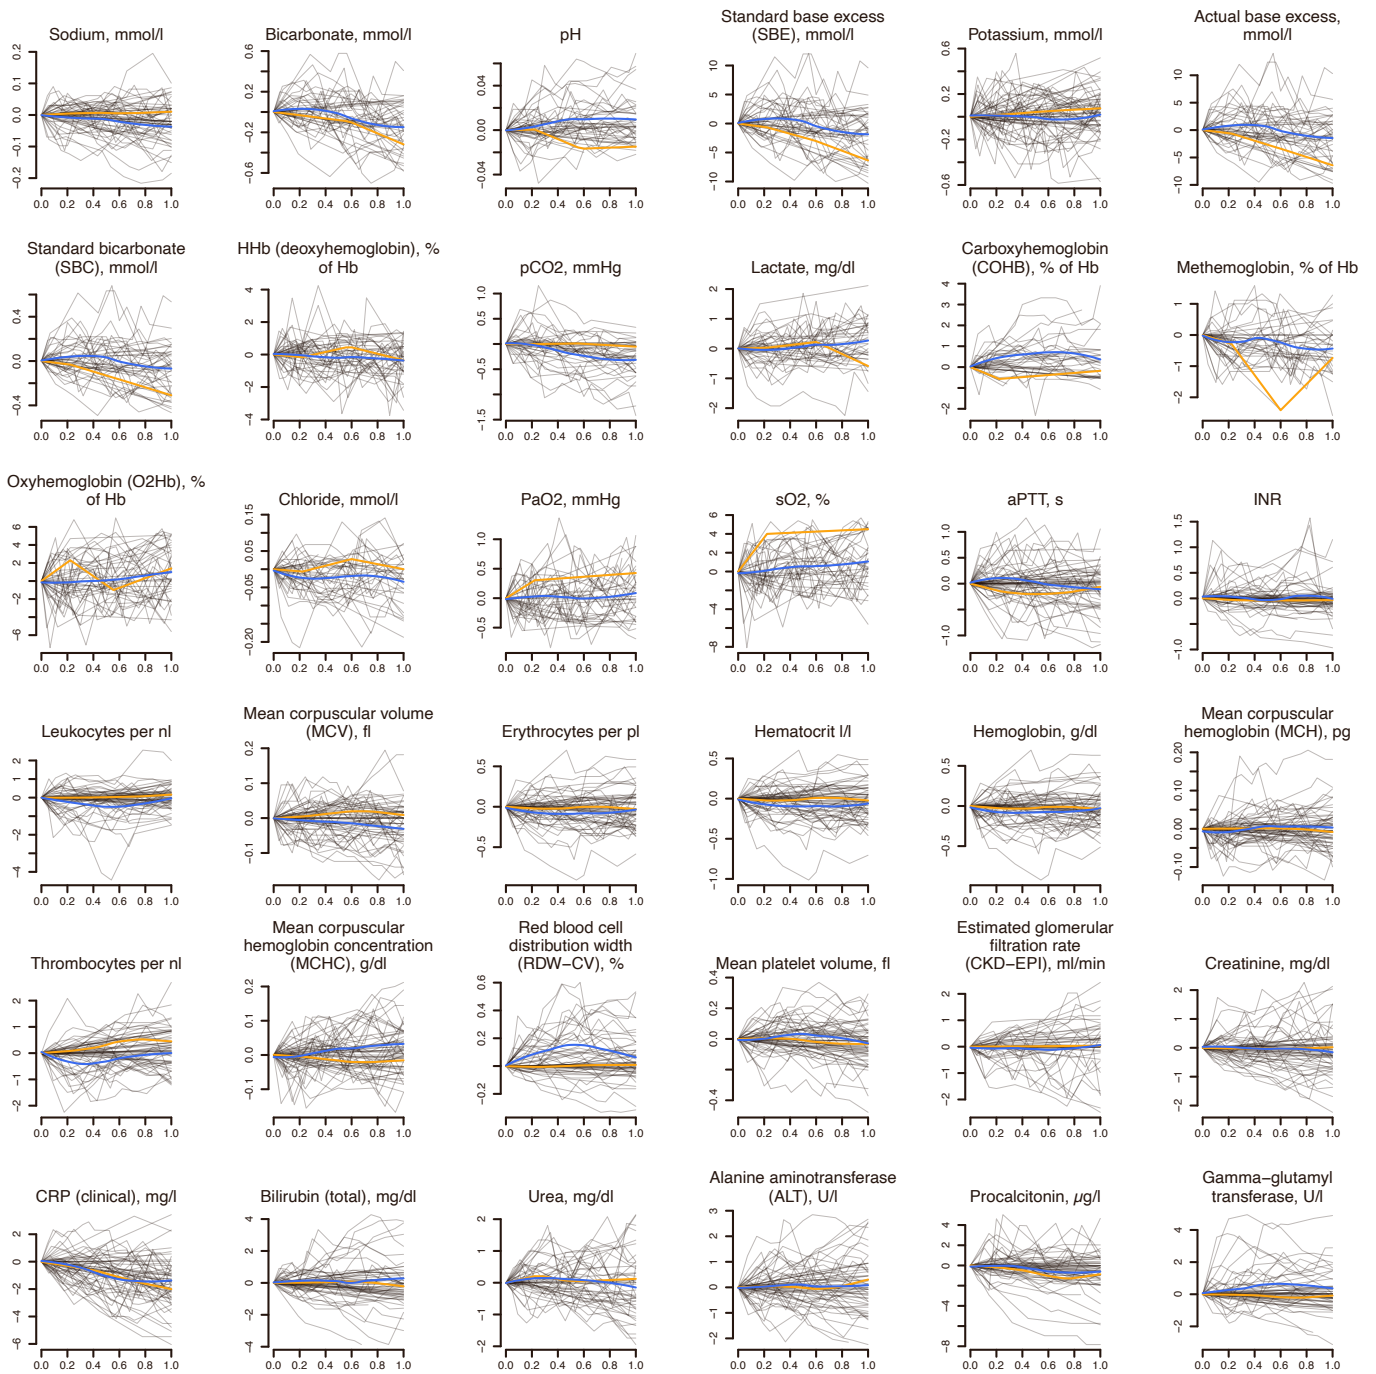

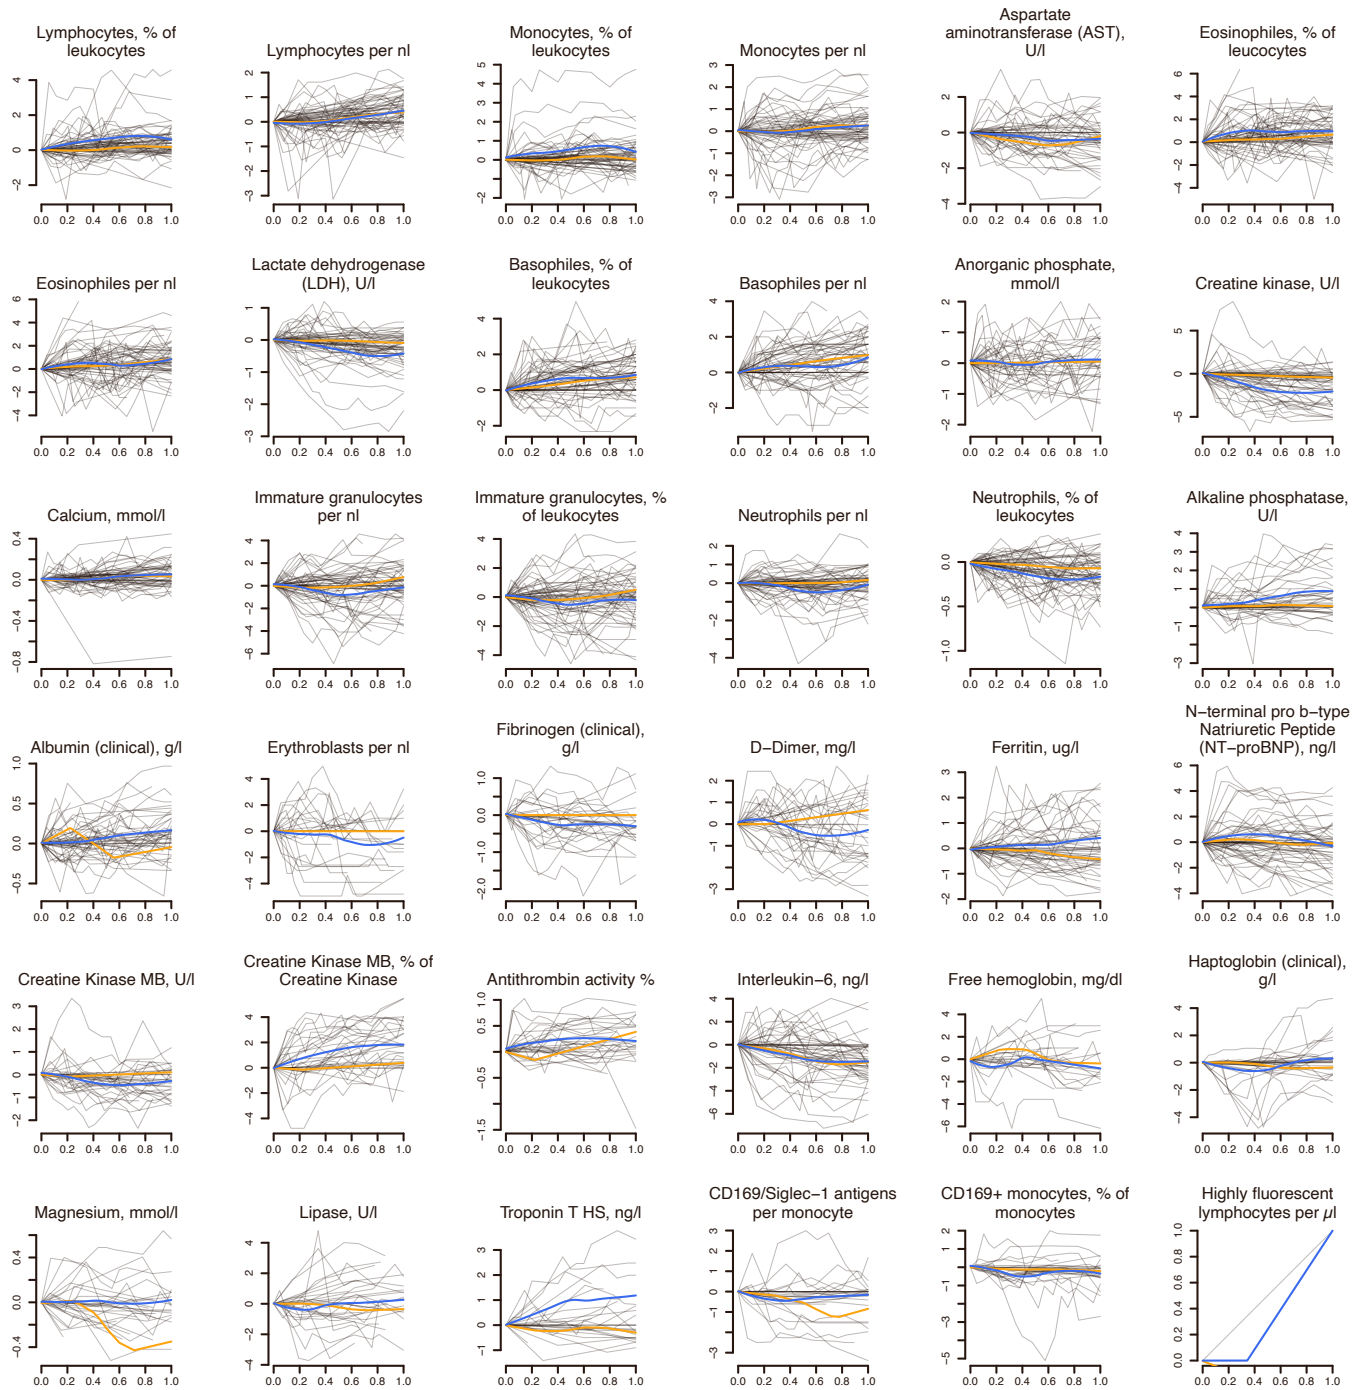

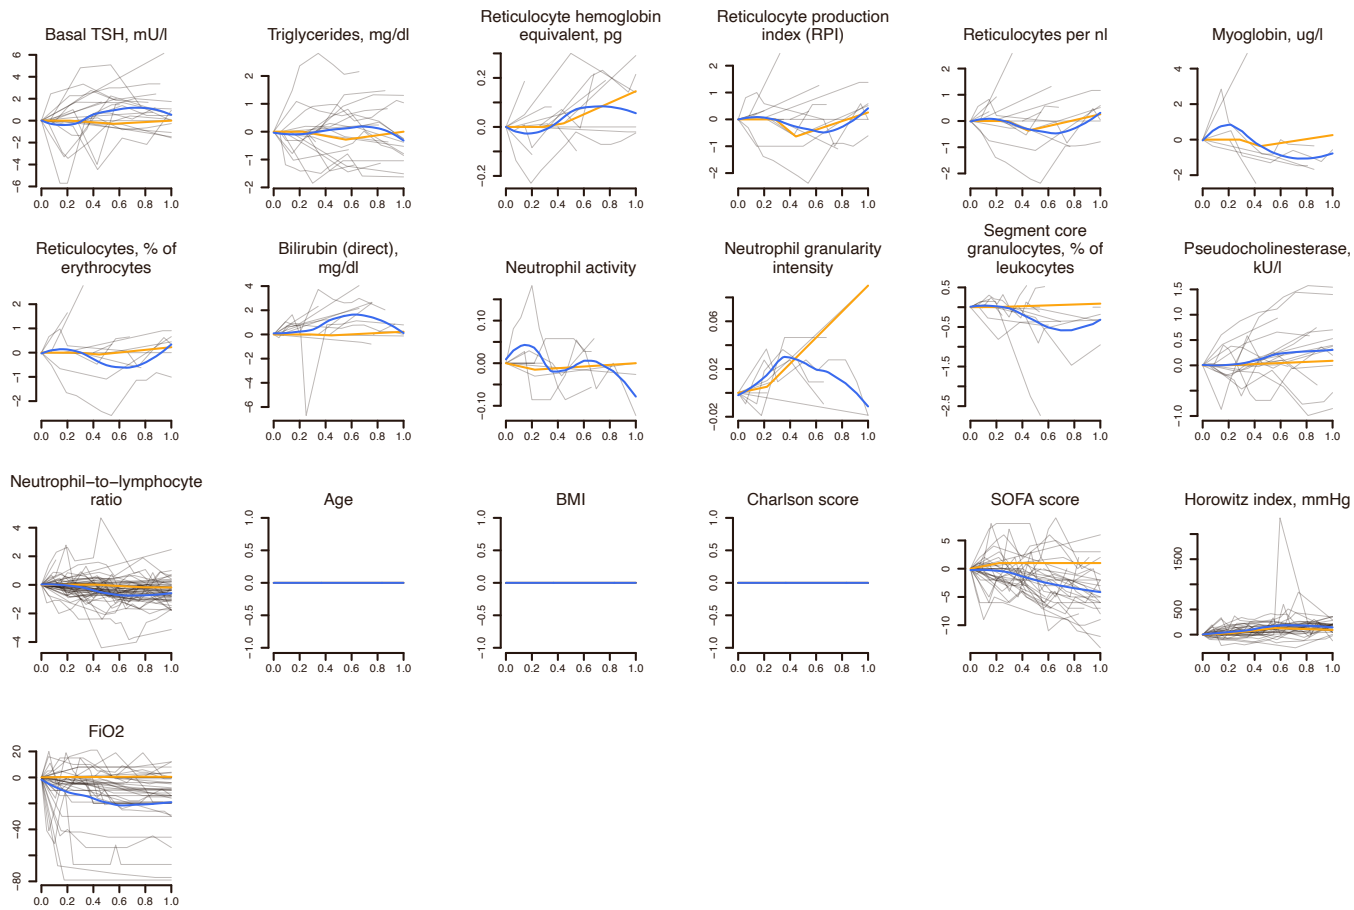

Figure S17. Omics features predictive of future disease worsening

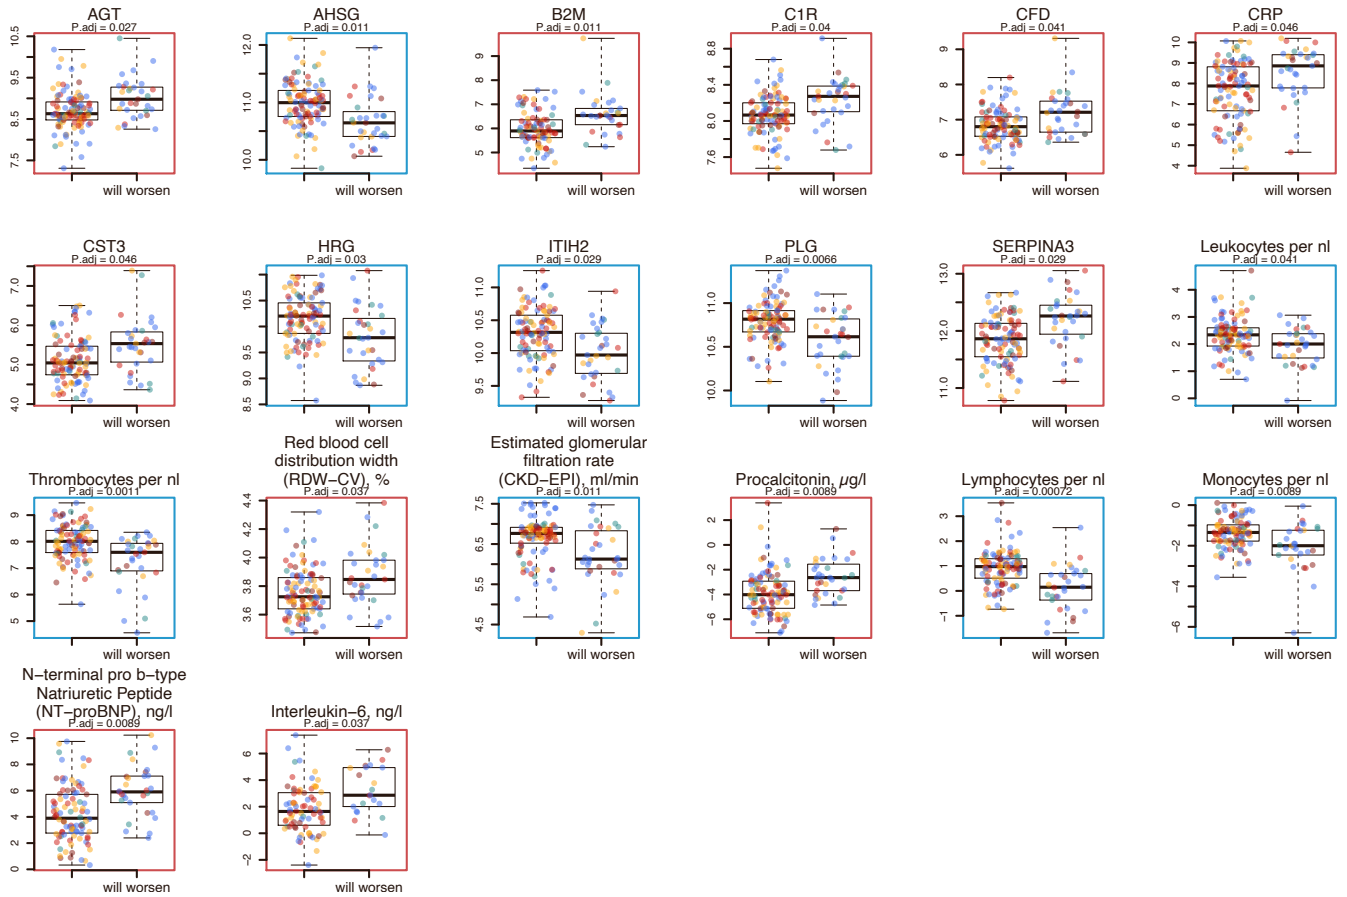

Figure S18 (following 2 pages). Omics features predictive of the remaining time in hospital for patients at WHO = 3

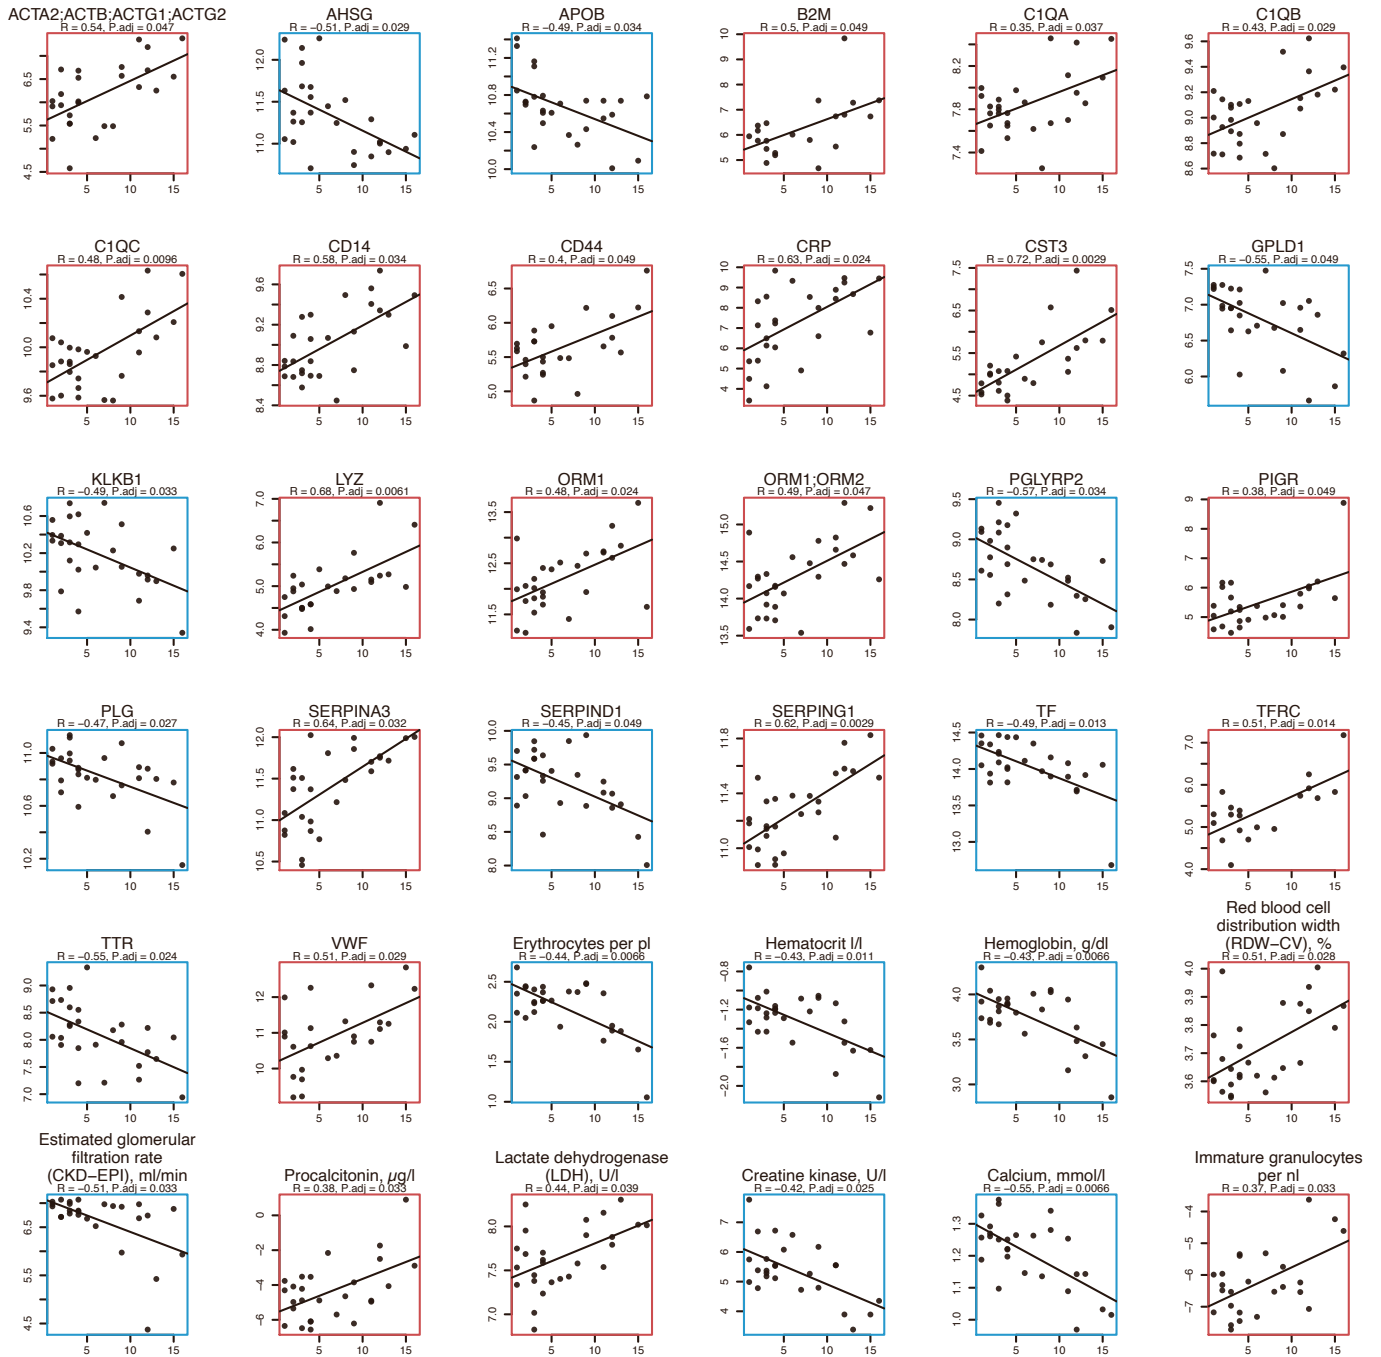

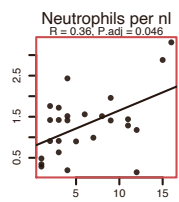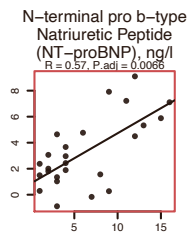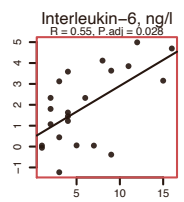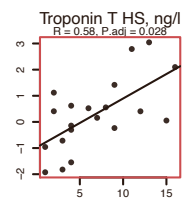

Supplement: mmc1.pdf [file mmc1.pdf]
